# Supplementary material
Source: PubMed Central journal article supplement (PMC5708352)

## Modular synthesis of thiazoline and thiazole derivatives by using a cascade protocol

Zakeyah A Alsharif,<sup>a</sup> Mohammad A. Alam<sup>a\*</sup>

Department of Chemistry and Physics, College of Science and Mathematics, Arkansas State University,  
Jonesboro, AR 72467

\*Corresponding author

Mohammad A Alam

E-mail: [malam@astate.edu](mailto:malam@astate.edu), Tel: +1-870-973-3319

### Materials and instrumentation

All commercial chemicals and solvents are reagent grade and were used without further treatment unless otherwise noted. <sup>1</sup>H NMR spectra were obtained with a Varian Mercury-300MHz with TMS as internal standard. <sup>13</sup>C NMR spectra were obtained with a Varian Mercury-75MHz with TMS as internal standard. The ESI-FTMS Mass spectra were recorded Bruker ApexII-FTMS system. Low resolution mass spectra were recorded in Shimadzu QQQ instrument.

## General Procedure

A mixture of thioamide derivative (1.0 mmol), Michael acceptor (1.1 mmol), and sodium acetate (1.1 mmol) in HFIP (5 mL) was for eight hours. Filtration to remove sodium bromide followed by evaporation gave the crude product. Recrystallization with ether or ethyl acetate followed by filtration afforded the pure product.

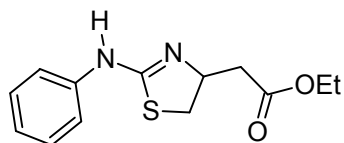

**Ethyl (2-anilino-4,5-dihydro-1,3-thiazol-4-yl)acetate (1)**

Beige powder, yield = 90%, m. p. = 158.8 °C, <sup>1</sup>H NMR (DMSO-d<sub>6</sub>, 300MHz): δ (ppm) 9.39 (s, 1H), 7.51 (s, 5H), 4.90 (s br, 1H), 3.95 (t, J = 9.0 Hz, 1H), 3.86 (q, J = 6.99 Hz, 1H), 3.50 – 3.45 (m, 1H), 2.81 (dd, J = 5.9, 16.2 Hz, 1H), 2.58-2.49 (m, 2H), 1.04 (t, J = 5.0 Hz, 3H); <sup>13</sup>C NMR (75MHz, DMSO-d<sub>6</sub>) δ = 170.1, 169.7, 134.9, 130.7, 130.3, 128.3, 65.0, 60.9, 36.3, 33.5, 14.3. HRMS (ESI-FTMS Mass (m/z): calcd for C<sub>13</sub>H<sub>17</sub>N<sub>2</sub>O<sub>2</sub>S [M + H]<sup>+</sup> 265.1005, found 265.1009.

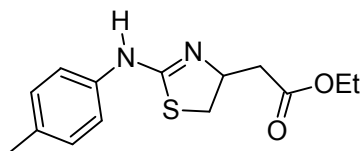

**Ethyl [2-(4-methylanilino)-4,5-dihydro-1,3-thiazol-4-yl]acetate (2)**

white powder, yield = 88%, m. p. = 140.0 °C, <sup>1</sup>H NMR (DMSO-d<sub>6</sub>, 300MHz): δ (ppm) 7.41 – 7.34 (m, 4H), 4.90 – 4.86 (m, 1H), 3.91 (q, J=7.74 Hz, 3H), 3.49 (dd, J = 6.6, 9.9 Hz, 1H), 2.79 (dd, , J = 9.3, 16.8 Hz, 1H), 2.60 – 2.59 (m, 1H), 2.61 (s, 3H), 2.49 (t, J = 1.5 Hz, 3H); <sup>13</sup>C NMR (75MHz, DMSO-d<sub>6</sub>) δ = 170.9, 169.6, 140.5, 131.9, 131.3, 128.1, 65.4, 60.9, 36.2, 33.3, 21.2, 14.2. HRMS (ESI-FTMS Mass (m/z): calcd for C<sub>14</sub>H<sub>19</sub>N<sub>2</sub>O<sub>2</sub>S [M + H]<sup>+</sup> 279.1162, found 279.1165.

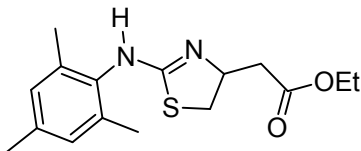

**Ethyl [2-(2,4,6-trimethylanilino)-4,5-dihydro-1,3-thiazol-4-yl]acetate (3)**

White powder, yield = 95%, m. p. = 154.8 °C, <sup>1</sup>H NMR (DMSO-d<sub>6</sub>, 300MHz): δ (ppm) 8.81 (s br, 1H), 7.06 (d, J = 5.2 Hz, 2H), 4.86 – 4.81 (m, 1H), 3.93 (dd, J = 7.2, 11.1Hz, 1H), 3.79 – 3.73 (m, 2H), 3.66 (t, J = 10.8 Hz, 1H), 2.92 (dd, J = 6.4, 16.4 Hz, 1H), 2.42 (d, J = 4.7 Hz, 1H), 2.50 – 2.41 (m, 3H), 2.13 (d, J = 4.1 Hz, 6H), 1.01 (t, J = 6.9 Hz, 3H); <sup>13</sup>C NMR (75MHz, DMSO-d<sub>6</sub>) δ = 170.6, 169.3, 140.4, 137.0, 136.6, 130.5, 130.4, 128.8, 63.9, 60.9, 36.2, 33.9, 21.0, 18.0, 17.8, 14.1. HRMS (ESI-FTMS Mass (m/z): calcd for C<sub>16</sub>H<sub>23</sub>N<sub>2</sub>O<sub>2</sub>S [M + H]<sup>+</sup> 307.1475, found 307.1478.

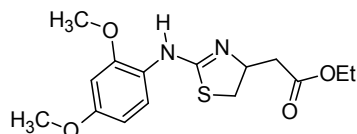

**Ethyl [2-(2,4-dimethoxyanilino)-4,5-dihydro-1,3-thiazol-4-yl]acetate (4)**

White powder, yield = 96%, m. p. = 190.0 °C, <sup>1</sup>H NMR (DMSO-d<sub>6</sub>, 300MHz): δ (ppm) 7.30 (br s, 1H), 6.75 (d, J = 2.4 Hz, 1H), 6.68 (dd, J = 2.4, 8.7 Hz, 1H), 4.73 (br s, 1H), 4.05 – 3.82 (m, 2H), 3.81 (s, 6H), 3.52 – 3.45 (m, 3H), 2.80 (dd, J = 6.5, 16.5 Hz, 1H), 1.09 (t, J = 7.0 Hz, 3H); <sup>13</sup>C NMR (75MHz, DMSO-d<sub>6</sub>) δ = 169.6, 162.5, 156.7, 130.2, 114.7, 106.5, 106.2, 100.3, 99.5, 41.9, 60.9, 56.6, 56.2, 36.5, 33.3, 14.2. HRMS (ESI-FTMS Mass (m/z): calcd for C<sub>15</sub>H<sub>21</sub>N<sub>2</sub>O<sub>4</sub>S [M + H]<sup>+</sup> 325.1217, found 325.1220.

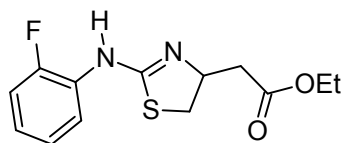

### Ethyl [2-(2-fluoroanilino)-4,5-dihydro-1,3-thiazol-4-yl]acetate (5)

White powder, yield = 95%, m. p. = 183.1 °C, <sup>1</sup>H NMR (DMSO-d<sub>6</sub>, 300MHz): δ (ppm) 9.18 (s, 1H), 7.66 – 7.59 (m 2H), 7.53 – 7.46 (m, 1H), 7.43 – 7.38 (m, 1H), 4.89 (br s, 1H), 3.96 (t, J = 10.4 Hz, 1H), 3.85 – 3.83 (m, 2H), 3.60 – 3.53 (m, 1H), 2.88 (d, J = 11.4 Hz, 1H), 2.5 (br s, 1H), 1.05 (t, J = 7.0 Hz, 3H); <sup>13</sup>C NMR (75MHz, DMSO-d<sub>6</sub>) δ = 172.0, 169.4, 158.1 (<sup>1</sup>J<sub>C-F</sub> = 249.4 Hz), 133.4 (<sup>3</sup>J<sub>C-F</sub> = 7.4 Hz), 130.7, 126.6, 121.6 (<sup>3</sup>J<sub>C-F</sub> = 12.90 Hz), 117.9 (<sup>2</sup>J<sub>C-F</sub> = 18.9 Hz), 64.9, 60.9, 36.3, 33.8, 14.2. HRMS (ESI-FTMS Mass (m/z): calcd for C<sub>13</sub>H<sub>16</sub>FN<sub>2</sub>O<sub>2</sub>S [M + H]<sup>+</sup> 283.0911, found 283.0914.

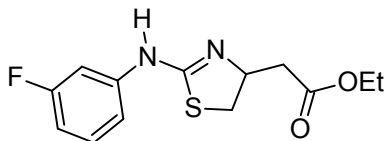

### Ethyl [2-(3-fluoroanilino)-4,5-dihydro-1,3-thiazol-4-yl]acetate (6)

Brownish powder, yield = 95%, m. p. = 135.0 °C, <sup>1</sup>H NMR (DMSO-d<sub>6</sub>, 300MHz): δ (ppm) 7.59 – 7.55 (m, 3H), 7.48 – 7.43 (m, 1H), 4.10 (q, J = 7.1 Hz, 3H), 3.73 (dd, J = 8.7, 11.2 Hz, 1H), 3.30 (dd, J = 8.0, 11.2 Hz, 1H), 2.79 (dd, J = 1.7, 6.6 Hz, 2H), 1.18 (t, J = 6.9 Hz, 3H); <sup>13</sup>C NMR (75MHz, DMSO-d<sub>6</sub>) δ = 170.8, 168.8, 162.3 (<sup>1</sup>J<sub>C-F</sub> = 243.6 Hz), 133.9, 131.7 (<sup>3</sup>J<sub>C-F</sub> = 8.1 Hz), 125.1, 119.7 (<sup>2</sup>J<sub>C-F</sub> = 20.7 Hz), 114.8 (<sup>2</sup>J<sub>C-F</sub> = 23.0 Hz), 72.3, 60.6, 38.7, 37.9, 14.5. HRMS (ESI-FTMS Mass (m/z): calcd for C<sub>13</sub>H<sub>16</sub>FN<sub>2</sub>O<sub>2</sub>S [M + H]<sup>+</sup> 283.0911, found 283.0913.

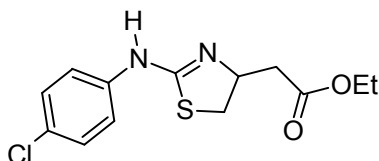

### Ethyl [2-(4-chloroanilino)-4,5-dihydro-1,3-thiazol-4-yl]acetate (7)

White powder, yield = 95%, m. p. = 202.3 °C, <sup>1</sup>H NMR (DMSO-d<sub>6</sub>, 300MHz): δ (ppm) 7.68 (d, J = 7.41 Hz, 2H), 7.54 (d, J = 7.5 Hz, 2H), 4.96 – 4.87 (m, 1H), 3.96 – 3.89 (m, 3H), 3.52 – 3.35 (m, 1H), 2.84 (dd, J = 9.3, 16.3, 1H), 2.53 (dd, J = 5.2, 16.6 Hz, 1H), 1.10 (t, J = 1.53 Hz, 3H); <sup>13</sup>C NMR (75MHz, DMSO-d<sub>6</sub>) δ = 171.2, 169.7, 135.4, 133.4, 130.9, 130.6, 65.2, 60.9, 36.3, 33.6, 14.2. HRMS (ESI-FTMS Mass (m/z): calcd for C<sub>13</sub>H<sub>16</sub>ClN<sub>2</sub>O<sub>2</sub>S [M + H]<sup>+</sup> 301.0586, found 301.0588.

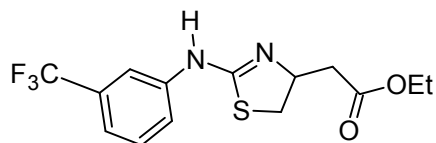

### Ethyl [2-[3-(trifluoromethyl)anilino]-4,5-dihydro-1,3-thiazol-4-yl]acetate (8)

White powder, yield = 93%, m. p. = 210.1 °C, <sup>1</sup>H NMR (DMSO-d<sub>6</sub>, 300MHz): δ (ppm) 8.92 (br s, 1H), 8.02 (s, 1H), 7.93 (s, 1H), 7.83 – 7.79 (m, 2H), 5.00 (quint, J = 6.9 Hz, 1H), 3.96 (dd, J = 7.8, 11.3 Hz, 1H), 3.86 (q, J = 6.7 Hz, 2H), 3.50 (dd, J = 6.7, 11.3 Hz, 1H), 2.86 (dd, J = 6.7, 16.7 Hz, 1H), 2.66 (dd, J = 5.6, 16.8 Hz, 1H), 1.05 (t, J = 7.0 Hz, 3H); <sup>13</sup>C NMR (75MHz, DMSO-d<sub>6</sub>) δ = 171.6, 169.6, 135.3, 133.2, 132.1, 131.3 (q, <sup>2</sup>J<sub>C-F</sub> = 32.1 Hz), 127.7, 126.1, 123.9 (<sup>1</sup>J<sub>C-F</sub> = 270 Hz), 65.4, 60.9, 36.3, 33.8, 14.2. HRMS (ESI-FTMS Mass (m/z): calcd for C<sub>14</sub>H<sub>16</sub>F<sub>3</sub>N<sub>2</sub>O<sub>2</sub>S [M + H]<sup>+</sup> 333.0879, found 333.0882.

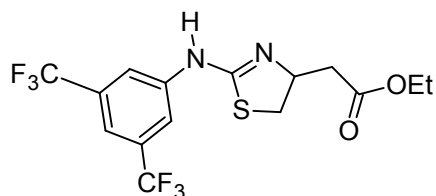

### Ethyl {2-[3,5-bis(trifluoromethyl)anilino]-4,5-dihydro-1,3-thiazol-4-yl}acetate (9)

White powder, yield = 87%, m. p. = 148.1 °C, <sup>1</sup>H NMR (DMSO-d<sub>6</sub>, 300MHz): δ (ppm) 9.08 (s, 1H), 8.40 (s, 2H), 8.36 (s, 1H), 5.04 (quint, J = 6.5 Hz, 1H), 3.96 (dd, J = 7.7, 11.1 Hz, 1H), 3.82 (q, J = 7.0 Hz, 2H), 3.49 (dd, J = 6.7, 11.2 Hz, 1H), 2.94 (dd, J = 6.4, 16.9 Hz, 1H), 2.76 (dd, J = 6.0, 16.8 Hz, 1H), 1.03 (t, J = 1.2 Hz, 3H); <sup>13</sup>C NMR (75MHz, DMSO-d<sub>6</sub>) δ = 172.1, 169.8, 136.5, 132.6 (<sup>2</sup>J<sub>C-F</sub> = 33.6), 131.0, 125.0, 121.4, 65.3, 60.9, 36.3, 34.1, 14.1. HRMS (ESI-FTMS Mass (m/z): calcd for C<sub>15</sub>H<sub>15</sub>F<sub>6</sub>N<sub>2</sub>O<sub>2</sub>S [M + H]<sup>+</sup> 401.0753, found 401.0754.

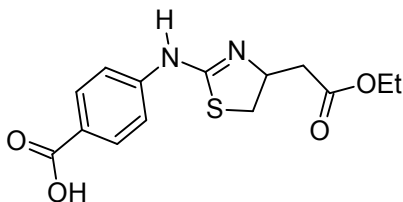

### 4-{{4-(2-Ethoxy-2-oxoethyl)-4,5-dihydro-1,3-thiazol-2-yl}amino}benzoic acid (10)

White powder, yield = 92%, m. p. = 250.0 °C, <sup>1</sup>H NMR (DMSO-d<sub>6</sub>, 300MHz): δ (ppm) 8.09 (d, J = 8.4 Hz, 2H), 7.64 (d, J = 8.4 Hz, 2H), 5.00 – 4.96 (m, 1H), 3.97 – 3.86 (m, 3H), 3.50 (dd, J = 6.3, 11.3 Hz, 1H), 2.85 (dd, J = 7.4, 16.6 Hz, 1H), 2.64 (dd, J = 4.9, 16.5 Hz, 1H), 1.07 (t, J = 7.0 Hz, 3H); <sup>13</sup>C NMR (75MHz, DMSO-d<sub>6</sub>) δ = 170.4, 169.7, 166.9, 138.7, 132.3, 131.6, 128.5, 64.9, 60.9, 36.2, 33.5, 14.2. HRMS (ESI-FTMS Mass (m/z): calcd for C<sub>14</sub>H<sub>17</sub>N<sub>2</sub>O<sub>4</sub>S [M + H]<sup>+</sup> 309.0904, found 309.0907.

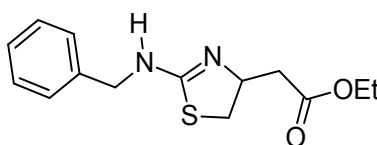

### Ethyl [2-(benzylamino)-4,5-dihydro-1,3-thiazol-4-yl]acetate (11)

White powder, yield = 97%, m. p. = 139.3 °C, <sup>1</sup>H NMR (DMSO-d<sub>6</sub>, 300MHz): δ (ppm) 9.78 (s, 1H), 7.44 – 7.36 (m, 3H), 7.30 (d, J = 7.5 Hz, 2H), 4.94 (d, J = 16.5 Hz, 1H), 4.69 (d, J = 16.4 Hz, 1H), 4.44 (s br, 1H), 4.04 (q, J = 7.2 Hz, 2H), 3.84 (dd, J = 8.07, 11.19 Hz, 1H), 3.35 (dd, J = 3, 11.4 Hz, 1H), 2.85 – 2.83 (m, 2H), 1.18 (t, J = 7.0 Hz, 3H); <sup>13</sup>C NMR (75MHz, DMSO-d<sub>6</sub>) δ = 170.6, 170.1, 134.3, 129.4, 128.5, 127.7, 62.3, 61.0, 48.4, 35.0, 33.3, 14.3. HRMS (ESI-FTMS Mass (m/z): calcd for C<sub>14</sub>H<sub>19</sub>N<sub>2</sub>O<sub>2</sub>S [M + H]<sup>+</sup> 279.1162, found 279.1165.

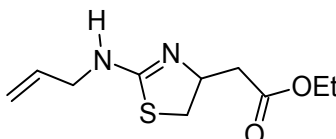

### Ethyl {2-[(prop-2-en-1-yl)amino]-4,5-dihydro-1,3-thiazol-4-yl}acetate (12)

White powder, m. p. = 90.4 °C, yield = 78%, <sup>1</sup>H NMR (DMSO-d<sub>6</sub>, 300MHz): δ (ppm) 9.56 (s, 1H), 5.86 – 5.76 (m, 1H), 5.29 (t, J = 16.9 Hz, 2H), 4.54 – 4.51 (m, 1H), 4.30 (d, J = 16.8 Hz, 1H), 4.12 – 4.05 (m, 3H), 3.82 (dd, J = 7.9, 11.4 Hz, 1H), 3.37-3.34 (m, 1H), 2.91 – 2.77 (m, 2H), 1.19 (t, J = 7.1 Hz, 3H); <sup>13</sup>C NMR (75MHz, DMSO-d<sub>6</sub>) δ = 170.1, 169.8, 130.7, 119.0, 62.3, 61.0, 47.6, 35.2, 33.3, 14.4. HRMS (ESI-FTMS Mass (m/z): calcd for C<sub>10</sub>H<sub>17</sub>N<sub>2</sub>O<sub>2</sub>S [M + H]<sup>+</sup> 229.1005, found 229.1007.

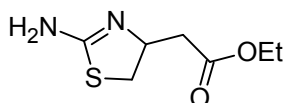

### Ethyl (2-amino-4,5-dihydro-1,3-thiazol-4-yl)acetate (13)

Brownish powder, m. p. = 80.0 °C, yield = 69%, <sup>1</sup>H NMR (DMSO-d<sub>6</sub>, 300MHz): δ (ppm) 4.49 (quint, J = 7.2 Hz, 1H), 4.09 (q, J = 7.1 Hz, 2H), 3.70 (dd, J = 7.7, 11.3 Hz, 1H), 3.30 (dd, J = 6.3, 11.3 Hz, 1H), 2.75 (d, J = 5.6 Hz, 2H), 1.19 (t, J = 7.0 Hz, 3H); <sup>13</sup>C NMR (75MHz, DMSO-d<sub>6</sub>) δ = 171.6, 170.5, 60.9, 58.6, 37.9, 35.9, 14.4. HRMS (ESI-FTMS Mass (m/z): calcd for C<sub>7</sub>H<sub>13</sub>N<sub>2</sub>O<sub>2</sub>S [M + H]<sup>+</sup> 189.0692, found 189.0695.

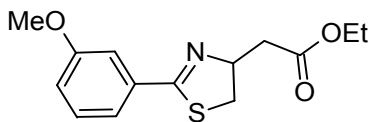

**Ethyl [2-(3-methoxyphenyl)-4,5-dihydro-1,3-thiazol-4-yl]acetate (14)**

Brownish powder, m. p. = 118.9 °C, yield = 83%, <sup>1</sup>H NMR (DMSO-d<sub>6</sub>, 300MHz): δ (ppm) 7.45 - 7.39 (m, 1H), 7.34 - 7.29 (m, 2H), 7.16 - 7.15 (m, 1H), 4.97 - 4.92 (m, 1H), 4.12 (q, J = 7.0 Hz, 2H), 3.79 (s, 3H), 3.68 (dd, J = 10.2, 19.2 Hz, 1H), 3.26 (dd, J = 7.9, 19.1 Hz, 1H), 2.80 - 2.73 (m, 2H), 1.20 (t, J = 7.14 Hz, 3H); <sup>13</sup>C NMR (75MHz, DMSO-d<sub>6</sub>) δ = 170.9, 169.1 159.7, 133.4, 130.6, 121.2, 118.4, 113.1, 72.7, 60.6, 55.8, 38.8, 37.6, 14.5. HRMS (ESI-FTMS Mass (m/z): calcd for C<sub>14</sub>H<sub>18</sub>NO<sub>3</sub>S [M + H]<sup>+</sup> 280.1002, found 280.1005.

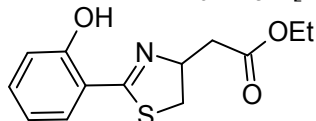

**Ethyl [2-(2-hydroxyphenyl)-4,5-dihydro-1,3-thiazol-4-yl]acetate (15)**

Brownish powder, m. p. = 162.5 °C, yield = 88%, <sup>1</sup>H NMR (DMSO-d<sub>6</sub>, 300MHz): δ (ppm) 7.58 (d, J = 7.9 Hz, 1H), 7.51 (t, J = 8.1 Hz, 1H), 7.05 - 6.96 (m, 2H), 5.02 (quint, J = 7.8 Hz, 1H), 4.10 (q, J = 7.0 Hz, 2H), 3.76 (t, J = 11.1 Hz, 1H), 3.33 (dd, J = 7.6, 11.4 Hz, 1H), 2.87 (d, J = 6.7 Hz, 1H), 2.84-2.79 (m, 1H), 1.17 (t, J = 7.1 Hz, 3H); <sup>13</sup>C NMR (75MHz, DMSO-d<sub>6</sub>) δ = 176.4, 170.6, 159.0, 135.9, 131.1, 120.0, 117.5, 114.5, 68.3, 60.8, 38.3, 35.7, 14.4. HRMS (ESI-FTMS Mass (m/z): calcd for C<sub>13</sub>H<sub>16</sub>NO<sub>3</sub>S [M + H]<sup>+</sup> 266.0845, found 266.0849.

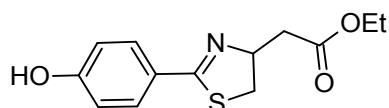

**Ethyl [2-(4-hydroxyphenyl)-4,5-dihydro-1,3-thiazol-4-yl]acetate (16)**

White powder, m. p. = 115.6 °C, yield = 80%, <sup>1</sup>H NMR (DMSO-d<sub>6</sub>, 300MHz): δ (ppm) 7.84 (d, J = 8.7 Hz, 2H), 6.97 (d, J = 1.9 Hz, 2H), 5.04 - 4.99 (m, 2H), 4.10 (q, J = 7.1 Hz, 2H), 3.87 (dd, J = 7.7, 11.3 Hz, 1H), 3.48 (dd, J = 7.7, 11.3 Hz, 1H), 3.06 - 2.72 (m, 1H), 1.18 (t, J = 2.7 Hz, 3H); <sup>13</sup>C NMR (75MHz, DMSO-d<sub>6</sub>) δ = 179.4, 170.2, 164.4, 132.4, 118.6, 116.7, 66.2, 60.9, 37.6, 36.6, 14.4. HRMS (ESI-FTMS Mass (m/z): calcd for C<sub>13</sub>H<sub>16</sub>NO<sub>3</sub>S [M + H]<sup>+</sup> 266.0845, found 266.0849.

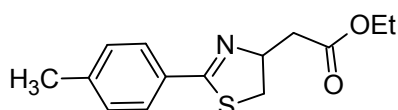

**Ethyl [2-(4-methylphenyl)-4,5-dihydro-1,3-thiazol-4-yl]acetate (17)**

Viscous liquid, yield = ~99%, <sup>1</sup>H NMR (DMSO-d<sub>6</sub>, 300MHz): δ (ppm) 7.63 (d, J = 7.4 Hz, 2H), 7.27 (d, J = 7.8 Hz, 2H), 4.89 (q, J = 7.6 Hz, 1H), 4.10 (q, J = 7.0 Hz, 2H), 3.60 (dd, J = 8.5, 10.5 Hz, 1H), 3.16 (dd, J = 8.0, 10.9 Hz, 1H), 2.79-2.64 (m, 2H), 2.33 (s, 3H), 1.19 (t, J = 7.1 Hz, 3H); <sup>13</sup>C NMR (75MHz, DMSO-d<sub>6</sub>) δ = 171.1, 166.3, 141.9, 130.3, 129.7, 128.4, 73.9, 60.5, 39.0, 37.7, 21.4, 14.5. HRMS (ESI-FTMS Mass (m/z): calcd for C<sub>13</sub>H<sub>16</sub>NO<sub>3</sub>S [M + H]<sup>+</sup> 264.3626, found 264.3624.

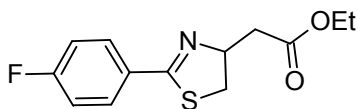

**Ethyl [2-(4-fluorophenyl)-4,5-dihydro-1,3-thiazol-4-yl]acetate (18)**

White powder, m. p. = 150.2 °C, yield = 84%, <sup>1</sup>H NMR (DMSO-d<sub>6</sub>, 300MHz): δ (ppm) 7.84 (dd, J = 5.6, 7.9 Hz, 2H), 7.35 (t, J = 8.7 Hz, 2H), 4.99 - 4.89 (m, 1H), 4.10 (q, J = 7.0 Hz, 2H), 3.71 (dd, J = 8.7, 11.1 Hz, 1H), 3.28 (dd, J = 8.0, 11.1 Hz, 1H), 2.84-2.76 (m, 2H), 1.11 (t, J = 7.1 Hz, 3H); <sup>13</sup>C NMR (75MHz, DMSO-d<sub>6</sub>) δ =

170.9, 165.0 ( $^1J_{C-F} = 248.6$  Hz), 131.2 ( $^3J_{C-F} = 8.4$  Hz), 128.6, 116.4 ( $^2J_{C-F} = 21.9$  Hz), 72.6, 60.6, 39.0, 38.8, 37.9, 14.5. HRMS (ESI-FTMS Mass (m/z): calcd for  $C_{13}H_{15}FNO_2S$   $[M + H]^+$  268.0802, found 268.0805.

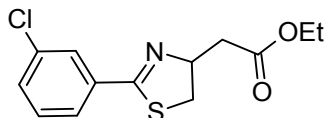

**Ethyl [2-(3-chlorophenyl)-4,5-dihydro-1,3-thiazol-4-yl]acetate (19)**

Brownish powder, m. p. = 144.9 °C, yield = 70%,  $^1H$  NMR (DMSO- $d_6$ , 300MHz):  $\delta$  (ppm) ; 7.64 (s, 1H), 7.64 – 7.65 (m, 2H), 7.54 (d,  $J = 7.0$  Hz, 1H), 5.01 – 4.91 (m, 1H), 4.09 (q,  $J = 7.05$  Hz, 2H), 3.30 (dd,  $J = 8.1, 11.1$  Hz, 1H), 2.79 (dd,  $J = 7.2, 16.2$  Hz, 1H), 2.76 – 2.71 (m, 2H), 1.19 (t,  $J = 6.0$  Hz, 3H);  $^{13}C$  NMR (75MHz, DMSO- $d_6$ )  $\delta = 170.8, 168.2, 134.0, 133.8, 132.4, 131.4, 127.7, 127.6, 72.6, 60.6, 38.7, 37.9, 14.5$ . HRMS (ESI-FTMS Mass (m/z): calcd for  $C_{13}H_{15}ClNO_2S$   $[M + H]^+$  286.0477, found 286.0481.

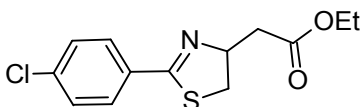

**Ethyl [2-(4-chlorophenyl)-4,5-dihydro-1,3-thiazol-4-yl]acetate (20)**

White powder, m. p. = 131.9 °C, yield = 75%,  $^1H$  NMR (DMSO- $d_6$ , 300MHz):  $\delta$  (ppm) 7.95 (d,  $J = 1.5$  Hz, 2H), 7.60 (d,  $J = 1.6$  Hz, 2H), 5.00 – 4.90 (m, 1H), 4.10 (q,  $J = 7.0$  Hz, 2H), 3.75 – 3.68 (m, 1H), 3.29 (dd,  $J = 8.1, 11.1$  Hz, 1H), 2.77 (d,  $J = 6.9$  Hz, 2H), 1.19 (t,  $J = 7.0$  Hz, 3H);  $^{13}C$  NMR (75MHz, DMSO- $d_6$ )  $\delta = 170.9, 168.2, 137.3, 130.8, 130.3, 129.5, 72.7, 60.6, 38.8, 37.9, 14.5$ . HRMS (ESI-FTMS Mass (m/z): calcd for  $C_{13}H_{15}ClNO_2S$   $[M + H]^+$  286.0477, found 286.0481.

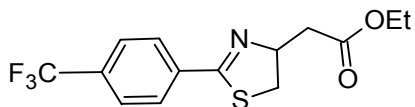

**Ethyl [2-[4-(trifluoromethyl)phenyl]-4,5-dihydro-1,3-thiazol-4-yl]acetate (21)**

White powder, m. p. = 148.0 °C, yield = 98%,  $^1H$  NMR (DMSO- $d_6$ , 300MHz):  $\delta$  (ppm) 7.95 (d,  $J = 8.4$  Hz, 2H), 7.86 (d,  $J = 8.4$  Hz, 2H), 5.00 – 4.92 (m, 1H), 4.09 (q,  $J = 7.1$  Hz, 2H), 3.28 (dd,  $J = 2.5, 11.19$  Hz, 1H), 3.28 (dd,  $J = 8.2, 11.16$  Hz, 1H), 2.78 (dd,  $J = 1.8, 10.86$  Hz, 2H), 1.14 (t,  $J = 7.0$  Hz, 3H);  $^{13}C$  NMR (75MHz, DMSO- $d_6$ )  $\delta = 170.9, 166.3, 136.2, 132.0$  (q,  $^{13}J_{C-F} = 31.8$  Hz), 129.2, 126.3 (q,  $^{14}J_{C-F} = 3.7$  Hz), 73.8, 60.5, 39.0, 38.1, 14.5. HRMS (ESI-FTMS Mass (m/z): calcd for  $C_{14}H_{15}F_3NO_2S$   $[M + H]^+$  318.077, found 318.0772.

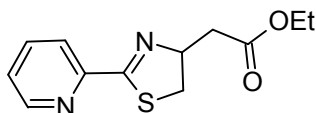

**Ethyl [2-(pyridin-2-yl)-4,5-dihydro-1,3-thiazol-4-yl]acetate (22)**

Viscous liquid, yield ~ 99%,  $^1H$  NMR (DMSO- $d_6$  +  $CDCl_3$ , 300MHz):  $\delta$  (ppm) 8.63 (d,  $J = 4.5$  Hz, 1H), 8.00-7.95 (m, 1H), 7.89 (t,  $J = 7.5$  Hz, 1H), 7.51 (t,  $J = 6.7$  Hz, 1H), 5.00 (quint,  $J = 8.0$  Hz, 2H), 4.10 (q,  $J = 7.1$  Hz, 2H), 3.54 (dd,  $J = 11.2$  Hz, 1H), 3.09 (dd,  $J = 8.1, 11.3$  Hz, 1H), 2.83-2.66 (m, 2H), 1.20 (t,  $J = 7.1$  Hz, 3H);  $^{13}C$  NMR (75MHz, DMSO- $d_6$  +  $CDCl_3$ )  $\delta = 170.8, 170.1, 150.4, 149.6, 137.4, 126.4, 121.7, 74.2, 60.5, 39.1, 36.5, 14.5$ . HRMS (ESI-FTMS Mass (m/z): calcd for  $C_{12}H_{15}N_2O_2S$   $[M + H]^+$  251.0854, found 251.0854.

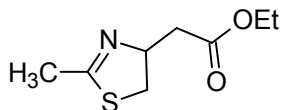

**Ethyl (2-methyl-4,5-dihydro-1,3-thiazol-4-yl)acetate (23)**

Viscous liquid, yield = 82%,  $^1\text{H}$  NMR (DMSO- $d_6$  +  $\text{CDCl}_3$ , 300MHz):  $\delta$  (ppm) 4.13-3.99 (m, 3H), 2.62-2.55 (m, 2H), 2.50-2.40 (m, 2H), 1.80 (s, 3H), 1.17 (t,  $J = 7.0$  Hz, 3H);  $^{13}\text{C}$  NMR (75MHz, DMSO- $d_6$  +  $\text{CDCl}_3$ )  $\delta = 170.8, 169.3, 60.3, 48.6, 37.6, 28.2, 23.0, 14.4$ . HRMS (ESI-FTMS Mass (m/z): calcd for  $\text{C}_8\text{H}_{14}\text{NO}_2\text{S}$  [ $\text{M} + \text{H}$ ] $^+$  188.0745, found 188.0848.

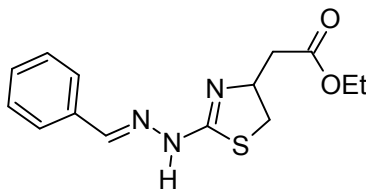

**Ethyl {2-[(2E)-2-benzylidenehydrazinyl]-4,5-dihydro-1,3-thiazol-4-yl}acetate (24)**

White powder, m. p. = 234.8 °C, yield = 90%,  $^1\text{H}$  NMR (DMSO- $d_6$  +  $\text{CDCl}_3$ , 300MHz):  $\delta$  (ppm) 10.08 (br s, 1H), 8.39 (s, 1H), 8.01 (d,  $J = 7.74$  Hz, 2H), 7.51 (s, 3H), 5.45 – 5.41 (m, 1H), 4.11 (q,  $J = \text{Hz}$ , 2H), 3.94 – 3.88 (m, 1H), 3.53 (d,  $J = 11.67$  Hz, 1H), 2.85 – 2.83 (m, 2H), 1.20 (t,  $J = 7.0$  Hz, 3H);  $^{13}\text{C}$  NMR (75MHz, DMSO- $d_6$  +  $\text{CDCl}_3$ )  $\delta = 169.5, 168.6, 151.5, 133.1, 131.8, 129.1, 128.9, 61.1, 56.8, 32.5, 32.3, 14.3$ . HRMS (ESI-FTMS Mass (m/z): calcd for  $\text{C}_{14}\text{H}_{18}\text{N}_3\text{O}_2\text{S}$  [ $\text{M} + \text{H}$ ] $^+$  292.1114, found 292.1118.

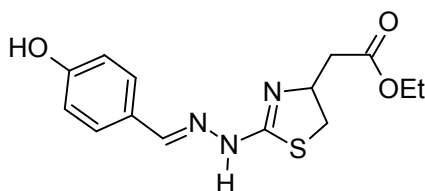

**Ethyl (2-[(2E)-2-[(4-hydroxyphenyl)methylidene]hydrazinyl]-4,5-dihydro-1,3-thiazol-4-yl)acetate (25)**

Brownish powder, m. p. = 241.4 °C, yield = 80%,  $^1\text{H}$  NMR (DMSO- $d_6$ , 300MHz):  $\delta$  (ppm) 10.17 (br s, 1H), 9.94 (br s, 1H), 8.27 (s, 1H), 7.84 (d,  $J = 7.6$  Hz, 2H), 6.87 (d,  $J = 7.5$  Hz, 2H), 5.37 (br s, 1H), 4.08 (q,  $J = 7.1$  Hz, 2H), 3.88 (dd,  $J = 7.8, 11.3$  Hz, 1H), 3.50 (d,  $J = 11.5$  Hz, 1H), 2.86 – 2.73 (m, 2H), 1.19 (t,  $J = 7.1$  Hz, 3H);  $^{13}\text{C}$  NMR (75MHz, DMSO- $d_6$ )  $\delta = 170.0, 167.6, 161.2, 151.4, 131.1, 124.3, 116.1, 61.1, 56.8, 32.4, 32.2, 14.4$ . HRMS (ESI-FTMS Mass (m/z): calcd for  $\text{C}_{14}\text{H}_{18}\text{N}_3\text{O}_3\text{S}$  [ $\text{M} + \text{H}$ ] $^+$  308.1063, found 308.1066.

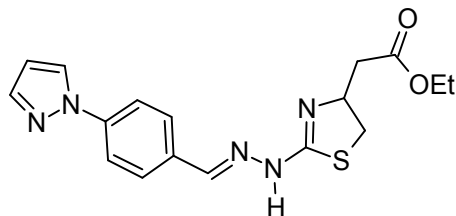

**Ethyl {2-[(2E)-2-[(1H-pyrazol-1-yl)phenyl]methylidene]hydrazinyl]-4,5-dihydro-1,3-thiazol-4-yl}acetate (26)**

Brownish powder, m. p. = 193.7 °C, yield = 79%,  $^1\text{H}$  NMR (DMSO- $d_6$ , 300MHz):  $\delta$  (ppm) 10.0 (br s, 1H), 8.65 (d,  $J = 2.4$  Hz, 1H), 8.41 (s, 1H), 8.14 (d,  $J = 8.5$  Hz, 2H), 8.05 (d,  $J = 8.5$  Hz, 2H), 7.81 (s, 1H), 6.60 (s, 1H), 5.43 – 5.40 (m, 1H), 4.11 (q,  $J = 7.0$  Hz, 2H), 3.95 – 3.88 (m, 1H), 3.55 – 3.51 (m, 1H), 2.85 (d,  $J = 6.0$  Hz, 2H), 1.20 (t,  $J = 7.1$  Hz, 3H);  $^{13}\text{C}$  NMR (75MHz, DMSO- $d_6$ )  $\delta = 170.0, 168.6, 150.1, 142.2, 142.0, 131.0, 130.4, 128.6, 118.6, 109.0, 61.1, 56.8, 32.4, 32.3, 14.4$ . HRMS (ESI-FTMS Mass (m/z): calcd for  $\text{C}_{17}\text{H}_{20}\text{N}_5\text{O}_2\text{S}$  [ $\text{M} + \text{H}$ ] $^+$  358.1332, found 358.1335.



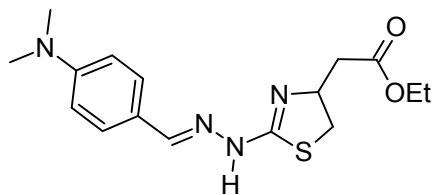

**Ethyl 2-((2E)-2-((4-(dimethylamino)phenyl)methylidene)hydrazinyl)-4,5-dihydro-1,3-thiazol-4-ylacetate (26)**

Brownish powder, m. p. = 180.6 °C, yield = 67%, <sup>1</sup>H NMR (DMSO-d<sub>6</sub>, 300MHz): δ (ppm) 8.21 (s, 1H), 7.78 (d, J = 7.3 Hz, 2H), 6.75 (d, J = 7.4 Hz, 2H), 5.36 (br s, 1H), 4.09 (q, J = 5.5 Hz, 2H), 3.85 (t, J = 10.8 Hz, 2H), 3.00 (s, 6H), 2.85 – 2.76 (m, 2H), 1.21 (t, J = Hz, 5.2, 3H); <sup>13</sup>C NMR (75MHz, DMSO-d<sub>6</sub>) δ = 170.0, 166.7, 152.8, 152.0, 130.6, 120.1, 111.8, 61.1, 56.9, 32.7, 32.0, 14.3. HRMS (ESI-FTMS Mass (m/z): calcd for C<sub>16</sub>H<sub>23</sub>N<sub>4</sub>O<sub>2</sub>S [M + H]<sup>+</sup> 335.1536, found 335.1541.

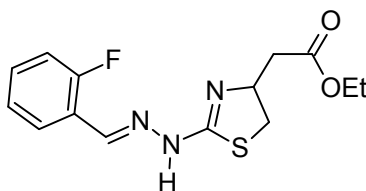

**Ethyl 2-((2E)-2-((2-fluorophenyl)methylidene)hydrazinyl)-4,5-dihydro-1,3-thiazol-4-ylacetate (28)**

Brownish powder, m. p. = 228.9 °C, yield = 80%, <sup>1</sup>H NMR (DMSO-d<sub>6</sub>, 300MHz): δ (ppm) 8.32 (s, 2H), 7.61 – 7.54 (m, 1H), 7.36 – 7.29 (m, 1H), 5.57 – 5.55 (m, 1H), 4.05 (q, J = 7.0 Hz, 3H), 3.91 – 3.85 (m, 2H), 2.83 (d, J = 5.6 Hz, 2H), 1.18 (t, J = 6.0 Hz, 3H); <sup>13</sup>C NMR (75MHz, DMSO-d<sub>6</sub>) δ = 170.0, 169.4, 162.4 (<sup>1</sup>J<sub>C-F</sub> = 251.5 Hz), 144.0, 134.4, 128.2, 125.3, 120.7 (<sup>3</sup>J<sub>C-F</sub> = 9.5 Hz), 116.4 (<sup>2</sup>J<sub>C-F</sub> = 20.4 Hz), 61.3, 56.7, 38.8, 32.8, 14.3. HRMS (ESI-FTMS Mass (m/z): calcd for C<sub>14</sub>H<sub>17</sub>FN<sub>3</sub>O<sub>2</sub>S [M + H]<sup>+</sup> 310.102, found 310.1024.

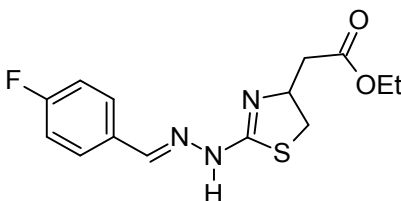

**Ethyl 2-((2E)-2-((4-fluorophenyl)methylidene)hydrazinyl)-4,5-dihydro-1,3-thiazol-4-ylacetate (29)**

White powder, m. p. = 204.0 °C, yield = 85%, <sup>1</sup>H NMR (DMSO-d<sub>6</sub>, 300MHz): δ (ppm) 8.41 (s, 1H), 8.12 – 8.08 (m, 2H), 7.36 (t, J = 8.7 Hz, 3H), 5.39 (s br, 1H), 4.10 (q, J = 6.9 Hz, 2H), 3.94 – 3.88 (m, 1H), 3.53 (d, J = 11.5 Hz, 1H), 2.84 – 2.83 (m, 2H), 1.20 (t, J = 7.1 Hz, 3H); <sup>13</sup>C NMR (75MHz, DMSO-d<sub>6</sub>) δ = 170.0, 168.6, 164.4 (<sup>1</sup>J<sub>C-F</sub> = 248.1 Hz), 149.9, 131.5 (<sup>3</sup>J<sub>C-F</sub> = 8.79 Hz), 130.1, 116.4 (<sup>2</sup>J<sub>C-F</sub> = 21.73 Hz), 61.1, 56.7, 32.4, 32.3, 14.4. HRMS (ESI-FTMS Mass (m/z): calcd for C<sub>14</sub>H<sub>17</sub>FN<sub>3</sub>O<sub>2</sub>S [M + H]<sup>+</sup> 310.102, found 310.1024.

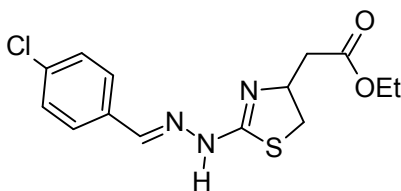

**Ethyl 2-((2E)-2-((4-chlorophenyl)methylidene)hydrazinyl)-4,5-dihydro-1,3-thiazol-4-ylacetate (30)**

White powder, m. p. = 210.1 °C, yield = 70%, <sup>1</sup>H NMR (DMSO-d<sub>6</sub>, 300MHz): δ (ppm) 10.22 (s, 1H), 8.41 (s, 1H), 8.07 (d, J = 7.2 Hz, 2H), 7.59 (d, J = 7.1 Hz, 2H), 5.42 – 5.40 (m, 1H), 4.10 (q, J = 6.5 Hz, 2H), 3.96 – 3.90 (m, 1H), 3.55 (d, J = 11.5 Hz, 1H), 2.85 (d, J = 5.7 Hz, 2H), 1.21 (t, J = 5.8 Hz, 3H); <sup>13</sup>C NMR (75MHz, DMSO-

d<sub>6</sub>)  $\delta$  = 169.9, 169.1, 150.0, 136.6, 132.3, 130.8, 129.3, 61.1, 56.8, 32.6, 32.2, 14.4. HRMS (ESI-FTMS Mass (m/z): calcd for C<sub>14</sub>H<sub>17</sub>ClN<sub>3</sub>O<sub>2</sub>S [M + H]<sup>+</sup> 328.0696, found 328.0700.

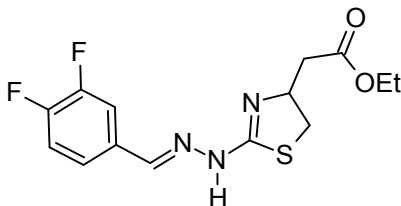

**Ethyl (2-((2E)-2-[(3,4-difluorophenyl)methylidene]hydrazinyl)-4,5-dihydro-1,3-thiazol-4-yl)acetate (31)**

Brownish powder, m. p. = 169.9 °C, yield = 86%, <sup>1</sup>H NMR (DMSO-d<sub>6</sub>, 300MHz):  $\delta$  (ppm) 10.22 (s, 1H), 8.27 (t, J = 8.3 Hz, 1H), 7.77 (s, 1H), 7.64-7.55 (m, 1H), 5.35 – 5.33 (m, 1H), 4.07 (q, J = 6.9 Hz, 2H), 3.90 (dd, J = 3.6, 11.2 Hz, 1H), 3.91 – 3.88 (m, 1H), 2.84 – 2.82 (m, 2H), 1.18 (t, J = 7.11 Hz, 3H); <sup>13</sup>C NMR (75MHz, DMSO-d<sub>6</sub>)  $\delta$  = 169.9, 169.3, 153.5 (<sup>1</sup>J<sub>C-F</sub> = 250.4 Hz, <sup>3</sup>J<sub>C-F</sub> = 12.6 Hz), 150.0 (<sup>1</sup>J<sub>C-F</sub> = 258.0 Hz, <sup>3</sup>J<sub>C-F</sub> = 13.4 Hz), 148.6, 131.2, 127.6, 118.5 (<sup>2</sup>J<sub>C-F</sub> = 17.6 Hz), 116.5 (<sup>2</sup>J<sub>C-F</sub> = 18.8 Hz), 61.1, 56.7, 32.6, 32.0, 14.4. HRMS (ESI-FTMS Mass (m/z): calcd for C<sub>14</sub>H<sub>16</sub>F<sub>2</sub>N<sub>3</sub>O<sub>2</sub>S [M + H]<sup>+</sup> 328.0926, found 328.0929.

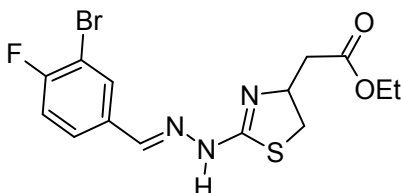

**Ethyl (2-((2E)-2-[(3-bromo-4-fluorophenyl)methylidene]hydrazinyl)-4,5-dihydro-1,3-thiazol-4-yl)acetate (32)**

White powder, m. p. = 140.1 °C, yield = 80%, <sup>1</sup>H NMR (DMSO-d<sub>6</sub>, 300MHz):  $\delta$  (ppm) 10.28 (s, 1H), 8.52 (d, J = 6.8 Hz, 1H), 8.39 (s, 1H), 8.05 – 8.01 (m, 1H), 7.54 (t, J = 6.7 Hz, 1H), 5.38 – 5.36 (m, 1H), 4.11 (q, J = 5.6 Hz, 2H), 3.93 (t, J = 10.5 Hz, 1H), 3.54 (d, J = 11.6 Hz, 1H), 2.85 – 2.83 (m, 2H), 1.20 (t, J = 4.8 Hz, 3H); <sup>13</sup>C NMR (75MHz, DMSO-d<sub>6</sub>)  $\delta$  = 169.9, 169.3, 160.0 (<sup>1</sup>J<sub>C-F</sub> = 248.9 Hz), 148.7, 133.2, 131.6, 131.3, 117.6 (<sup>2</sup>J<sub>C-F</sub> = 22.90 Hz), 109.5 (<sup>2</sup>J<sub>C-F</sub> = 21.4 Hz), 61.1, 56.7, 32.6, 32.0, 14.4. HRMS (ESI-FTMS Mass (m/z): calcd for C<sub>14</sub>H<sub>16</sub>BrFN<sub>3</sub>O<sub>2</sub>S [M + H]<sup>+</sup> 390.0105, found 390.0108.

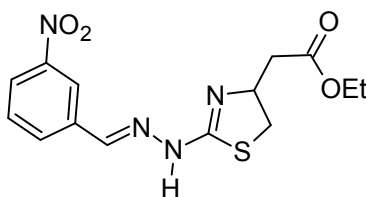

**Ethyl (2-((2E)-2-[(3-nitrophenyl)methylidene]hydrazinyl)-4,5-dihydro-1,3-thiazol-4-yl)acetate (33)**

White powder, m. p. = 183.9 °C, yield = 84%, <sup>1</sup>H NMR (DMSO-d<sub>6</sub>, 300MHz):  $\delta$  (ppm) 10.38 (s, 1H), 8.87 (s, 1H), 8.56 (s, 1H), 8.50 (d, J = 7.38 Hz, 1H), 8.33 (dd, J = 1.6, 1.6 Hz, 1H), 7.81 (t, J = 7.5 Hz, 1H), 5.43 – 5.36 (m, 1H), 4.11 (q, J = 7.0 Hz, 2H), 3.96 (dd, J = 7.7, 11.6 Hz, 1H), 3.56 (d, J = 11.4 Hz, 1H), 2.90 – 2.87 (m, 2H), 1.21 (t, J = 6.72 Hz, 3H); <sup>13</sup>C NMR (75MHz, DMSO-d<sub>6</sub>)  $\delta$  = 170.0, 169.6, 149.2, 148.6, 135.1, 134.8, 130.8, 126.1, 123.7, 61.1, 56.9, 32.6, 31.9, 14.4. HRMS (ESI-FTMS Mass (m/z): calcd for C<sub>14</sub>H<sub>17</sub>N<sub>4</sub>O<sub>4</sub>S [M + H]<sup>+</sup> 337.0965, found 337.0965.

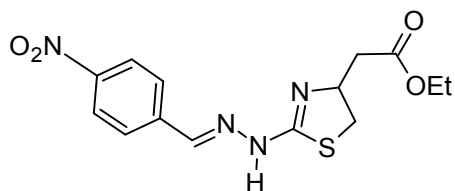

**Ethyl 2-((2E)-2-((4-nitrophenyl)methylidene)hydrazinyl)-4,5-dihydro-1,3-thiazol-4-yl}acetate (34)**

Yellowish powder, m. p. = 217.8 °C, yield = 86%, <sup>1</sup>H NMR (DMSO-d<sub>6</sub>, 300MHz): δ (ppm) 8.44 (s, 1H), 8.32 (d, J = 7.62 Hz, 2H), 8.23 (d, J = 8.7 Hz, 2H), 5.35 (s br, 1H), 4.11 – 4.06 (m, 4H), 2.84 – 2.72 (m, 2H), 1.19 (t, J = 6.99 Hz, 3H); <sup>13</sup>C NMR (75MHz, DMSO-d<sub>6</sub>) δ = 170.0, 168.6, 148.9, 147.6, 139.7, 129.7, 124.3, 61.2, 56.7, 32.3, 32.1, 14.4. HRMS (ESI-FTMS Mass (m/z): calcd for C<sub>14</sub>H<sub>17</sub>N<sub>4</sub>O<sub>4</sub>S [M + H]<sup>+</sup> 337.0965, found 337.0969.

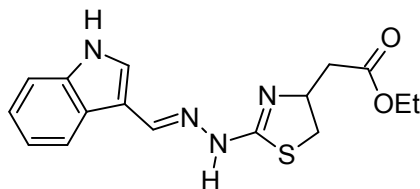

**Ethyl 2-((2E)-2-((3H-indol-3-yl)methylidene)hydrazinyl)-4,5-dihydro-1,3-thiazol-4-yl}acetate (35)**

Brownish powder, m. p. = 193.1 °C, yield = 75%, <sup>1</sup>H NMR (DMSO-d<sub>6</sub>, 300MHz): δ (ppm) 11.93 (s, 1H), 8.56 (s, 1H), 8.27 (d, J = 7.3 Hz, 1H), 8.01 (s, 1H), 7.45 (d, J = 7.6 Hz, 1H), 7.23 – 7.14 (m, 2H), 5.42 (s br, 1H), 4.05 (s, 2H), 4.05 – 4.00 (m, 2H), 3.88 – 3.82 (m, 1H), 2.87 – 2.70 (m, 2H), 1.12 (t, J = 6.9 Hz, 3H); <sup>13</sup>C NMR (75MHz, DMSO-d<sub>6</sub>) δ = 169.9, 166.2, 151.4, 137.5, 135.0, 124.1, 123.6, 122.8, 121.7, 112.5, 110.5, 61.1, 57.8, 33.0, 31.8, 14.3. HRMS (ESI-FTMS Mass (m/z): calcd for C<sub>16</sub>H<sub>19</sub>N<sub>4</sub>O<sub>2</sub>S [M + H]<sup>+</sup> 331.1223, found 331.1226.

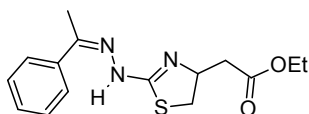

**Ethyl 2-((2Z)-2-(1-phenylethylidene)hydrazinyl)-4,5-dihydro-1,3-thiazol-4-yl}acetate (36)**

White powder, m. p. = 166.0 °C, yield = 85%, <sup>1</sup>H NMR (DMSO-d<sub>6</sub>, 300MHz): δ (ppm) 7.96 (d, J = 8.1 Hz, 2H), 7.61 – 7.58 (m, 1H), 7.54 – 7.49 (m, 2H), 4.84 – 4.80 (m, 1H), 3.94 – 3.88 (m, 3H), 3.55 – 3.51 (m, 2H), 2.88 – 2.77 (m, 2H), 2.44 (s, 3H), 1.07 (t, J = 7.1 Hz, 3H); <sup>13</sup>C NMR (75MHz, DMSO-d<sub>6</sub>) δ = 180.5, 169.9, 166.0, 135.5, 132.7, 128.8, 128.4, 64.2, 61.0, 35.6, 31.7, 17.7, 14.2. HRMS (ESI-FTMS Mass (m/z): calcd for C<sub>15</sub>H<sub>20</sub>N<sub>3</sub>O<sub>2</sub>S [M + H]<sup>+</sup> 306.1271, found 306.1275.

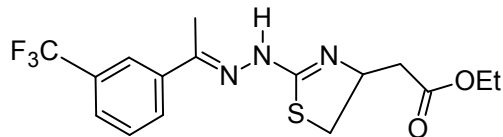

**Ethyl 2-((2E)-2-((2-(3-(trifluoromethyl)phenyl)propylidene)hydrazinyl)-4,5-dihydro-1,3-thiazol-4-yl}acetate (37)**

White powder, m. p. = 95.1 °C, yield = 76%, <sup>1</sup>H NMR (DMSO-d<sub>6</sub>, 300MHz): δ (ppm) 9.61 (bs a, 1H), 8.24-8.22 (m, 2H), 7.98 (d, J = 7.5 Hz, 1H), 7.75 (t, J = 7.8 Hz, 1H), 4.84 – 4.80 (m, 1H), 3.94 – 3.87 (m, 3H), 3.51 (dd, J = 6.0, 11.3 Hz, 1H), 2.92 – 2.83 (m, 2H), 2.50 (s, 3H), 1.07 (t, J = 7.0 Hz, 3H); <sup>13</sup>C NMR (75MHz, DMSO-d<sub>6</sub>) δ = 179.0, 170.0, 165.9, 134.5 (<sup>1</sup>J<sub>C-F</sub> = 310 Hz), 130.2, 129.6 (<sup>2</sup>J<sub>C-F</sub> = 32.0 Hz), 128.8, 126.2, 124.6, 122.6, 64.1, 60.8, 35.8, 31.7, 18.0, 14.2. HRMS (ESI-FTMS Mass (m/z): calcd for C<sub>16</sub>H<sub>19</sub>F<sub>3</sub>N<sub>3</sub>O<sub>2</sub>S [M + H]<sup>+</sup> 374.1145, found 374.1144.

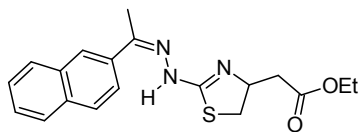

**Ethyl (2-((2E)-2-[2-(naphthalen-2-yl)propylidene]hydrazinyl)-4,5-dihydro-1,3-thiazol-4-yl)acetate (38)**

White powder, m. p. = 191.0 °C, yield = 70%, <sup>1</sup>H NMR (DMSO-d<sub>6</sub>, 300MHz): δ (ppm) 9.70 (br s, 1H), 8.60 (s, 1H), 8.09 – 8.07 (m, 2H), 8.00 – 7.98 (m, 2H), 7.62 (s, 2H), 4.87 (br s, 1H), 3.96 – 3.87 (m, 3H), 3.53 – 3.45 (m, 2H), 2.96-2.82 (m, Hz, 2H), 2.57 (s, 2H), 1.01 (t, J = 3.9 Hz, 3H); <sup>13</sup>C NMR (75MHz, DMSO-d<sub>6</sub>) δ = 180.3, 169.9, 166.0, 134.9, 132.9, 132.6, 130.1, 129.6, 128.6, 128.1, 128.0, 127.3, 124.3, 64.3, 60.9, 35.7, 31.8, 17.8, 14.2. HRMS (ESI-FTMS Mass (m/z): calcd for C<sub>19</sub>H<sub>22</sub>N<sub>3</sub>O<sub>2</sub>S [M + H]<sup>+</sup> 356.1427, found 356.143.

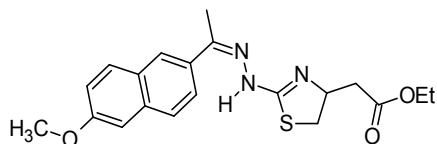

**Ethyl (2-((2Z)-2-[1-(6-methoxynaphthalen-2-yl)ethylidene]hydrazinyl)-4,5-dihydro-1,3-thiazol-4-yl)acetate (39)**

White powder, m. p. = 216.2 °C, yield = 68%, <sup>1</sup>H NMR (DMSO-d<sub>6</sub>, 300MHz): δ (ppm) 8.48 (s, 1H), 8.02 (dd, J = 8.7, 13.4 Hz, 2H), 7.88 (d, J = 8.7 Hz, 1H), 7.40 (s, 1H), 7.25 (dd, J = 2.1, 8.9 Hz, 1H), 4.82-4.77 (m, 1H), 3.91-3.85 (s, 6H), 3.52-3.50 (m, 1H), 2.85 (m, 2H), 2.50 (s, 3H), 1.03 (t, J = 7.0 Hz, 3H); <sup>13</sup>C NMR (75MHz, DMSO-d<sub>6</sub>) δ = 179.1, 170.0, 165.2, 159.4, 136.7, 131.2, 130.7, 129.7, 127.9, 127.0, 124.8, 119.8, 106.4, 64.1, 60.9, 55.8, 35.9, 31.5, 17.4, 14.2. HRMS (ESI-FTMS Mass (m/z): calcd for C<sub>20</sub>H<sub>24</sub>N<sub>3</sub>O<sub>3</sub>S [M + H]<sup>+</sup> 386.1533, found 386.1536.

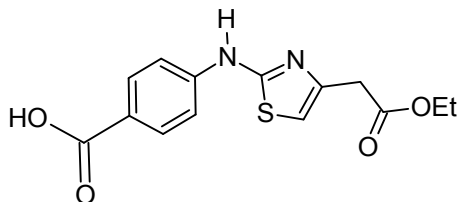

**4-[[4-(2-Ethoxy-2-oxoethyl)-1,3-thiazol-2-yl]amino]benzoic acid (40)**

White powder, m. p. = 273.0 °C, yield = 90%, <sup>1</sup>H NMR (DMSO-d<sub>6</sub>, 300MHz): δ (ppm) 8.14 (d, J = 8.4 Hz, 2H), 7.62 (d, J = 8.4 Hz, 2H), 7.07 (s, 1H), 3.85 (q, J = 7.0 Hz, 2H), 3.56 (s, 2H), 0.97 (t, J = 7.1 Hz, 3H); <sup>13</sup>C NMR (75MHz, DMSO-d<sub>6</sub>) δ = 169.7, 168.2, 166.8, 136.3, 134.2, 133.7, 131.8, 129.5, 107.1, 61.4, 33.6, 14.1. HRMS (ESI-FTMS Mass (m/z): calcd for C<sub>14</sub>H<sub>15</sub>N<sub>2</sub>O<sub>4</sub>S [M + H]<sup>+</sup> 307.0747, found 307.0751.

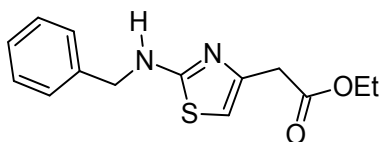

**Ethyl [2-(benzylamino)-1,3-thiazol-4-yl]acetate (41)**

White powder, m. p. = 220.0 °C, yield = 85%, <sup>1</sup>H NMR (DMSO-d<sub>6</sub>, 300MHz): δ (ppm) 9.69 (br s, 1H), 7.41 – 7.33 (m, 3H), 7.08 (d, J = 7.0 Hz, 2H), 7.01 (s, 1H), 5.30 (s, 2H), 3.84 (q, J = Hz, 2H), 3.76 (s, 2H), 1.06 (t, J = 7.0 Hz, 3H); <sup>13</sup>C NMR (75MHz, DMSO-d<sub>6</sub>) δ = 169.6, 168.3, 134.5, 133.7, 129.2, 128.5, 126.5, 107.4, 61.5, 48.7, 33.1, 14.2. HRMS (ESI-FTMS Mass (m/z): calcd for C<sub>14</sub>H<sub>17</sub>N<sub>2</sub>O<sub>2</sub>S [M + H]<sup>+</sup> 277.1005, found 277.1008.

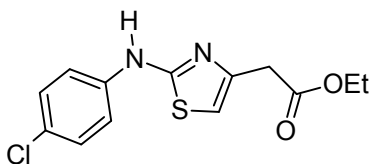

**Ethyl {2-[(4-chlorophenyl)amino]-1,3-thiazol-4-yl}acetate (42)**

Brownish solid, m. p. = 220.0 °C, yield = 99%, <sup>1</sup>H NMR (DMSO-d<sub>6</sub>, 300MHz): 7.90 (d, J = 8.4 Hz, 2H), 7.56 (s, 1H), 7.53 (d, J = 8.4 Hz, 2H), 4.11 (q, J = 6.9 Hz, 2H), 3.87 (s, 2H), 1.18 (t, J = 7.0 Hz, 3); <sup>13</sup>C NMR (75MHz, CDCl<sub>3</sub>) δ = 169.9, 166.0, 149.6, 135.4, 131.5, 128.6, 127.3, 115.9, 60.7, 36.6, 13.7. HRMS (ESI-FTMS Mass (m/z): calcd for C<sub>13</sub>H<sub>14</sub>N<sub>2</sub>O<sub>2</sub>S [M + H]<sup>+</sup> 297.7799, found 297.7797.

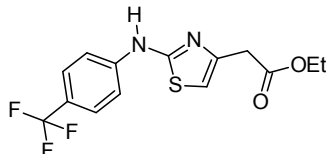

**Ethyl (2-{[4-(trifluoromethyl)phenyl]amino}-1,3-thiazol-4-yl)acetate (43)**

Viscous liquid, yield = 99%, <sup>1</sup>H NMR (CDCl<sub>3</sub>, 300MHz): 8.06 (d, J = 8.2 Hz, 2H), 7.69 (d, J = 8.2 Hz, 2H), 7.29 (s, 1H), 4.23 (q, J = 7.1 Hz, 2H), 3.92 (s, 2H), 1.41 (t, J = 7.3 Hz, 3H); <sup>13</sup>C NMR (75MHz, CDCl<sub>3</sub>) δ = 170.3, 165.9, 150.4, 136.5, 131.5 (<sup>2</sup>J = 32.5 Hz), 126.7, 125.9 (<sup>3</sup>J = 3.7 Hz), 117.2, 61.2, 37.0, 14.2. HRMS (ESI-FTMS Mass (m/z): calcd for C<sub>14</sub>H<sub>14</sub>F<sub>3</sub>N<sub>2</sub>O<sub>2</sub>S [M + H]<sup>+</sup> 331.3328, found 331.3328.

# Ethyl (2-anilino-4,5-dihydro-1,3-thiazol-4-yl)acetate (1)

<sup>1</sup>H NMR of 1

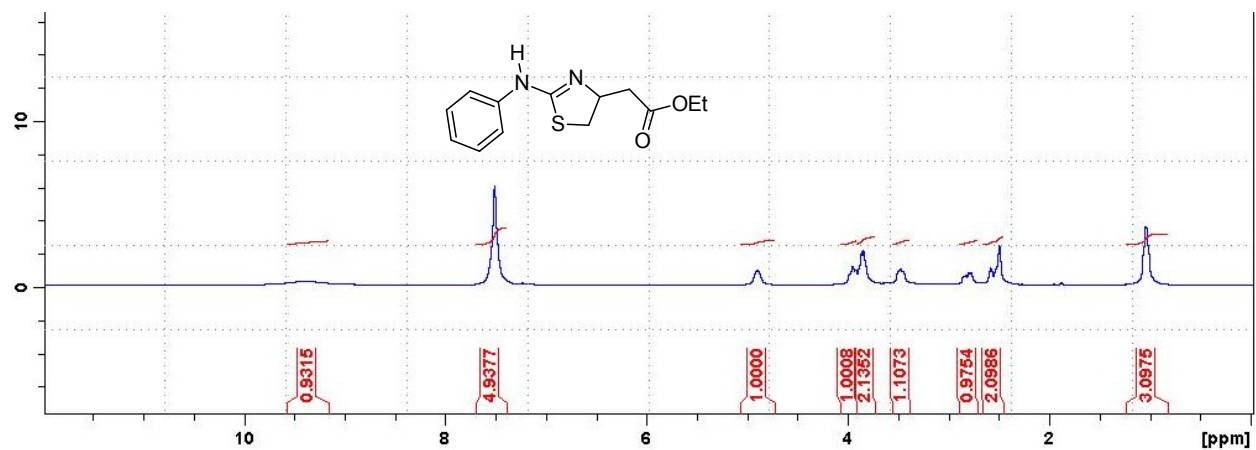

<sup>13</sup>C NMR of 1

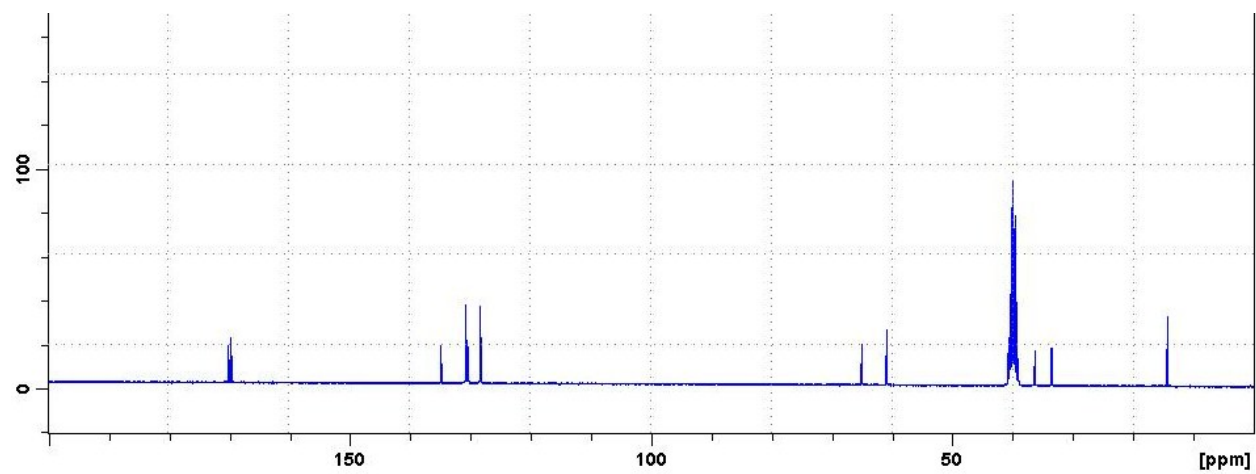

# Ethyl [2-(4-methylanilino)-4,5-dihydro-1,3-thiazol-4-yl]acetate (2)

<sup>1</sup>H NMR of 2

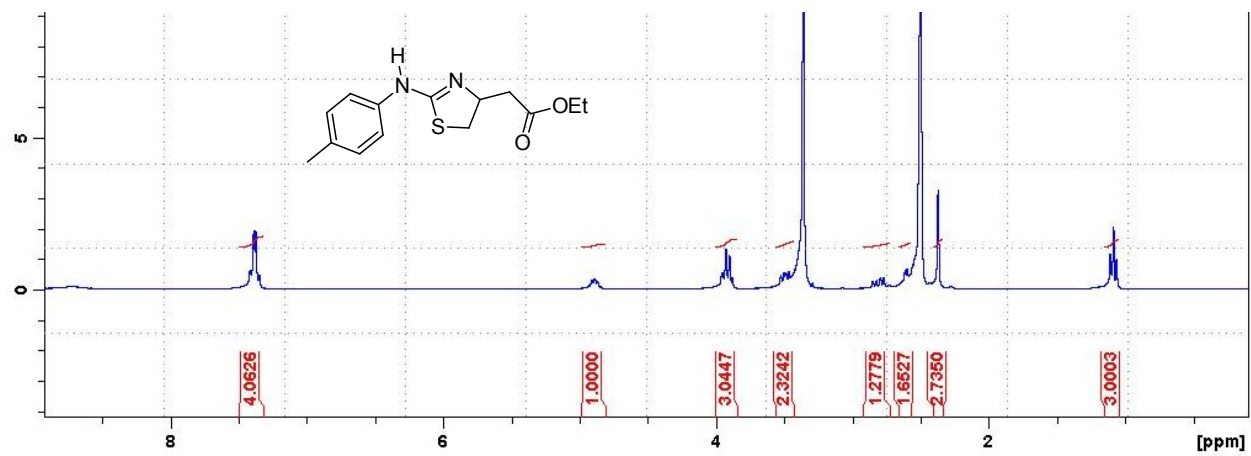

<sup>13</sup>C NMR of 2

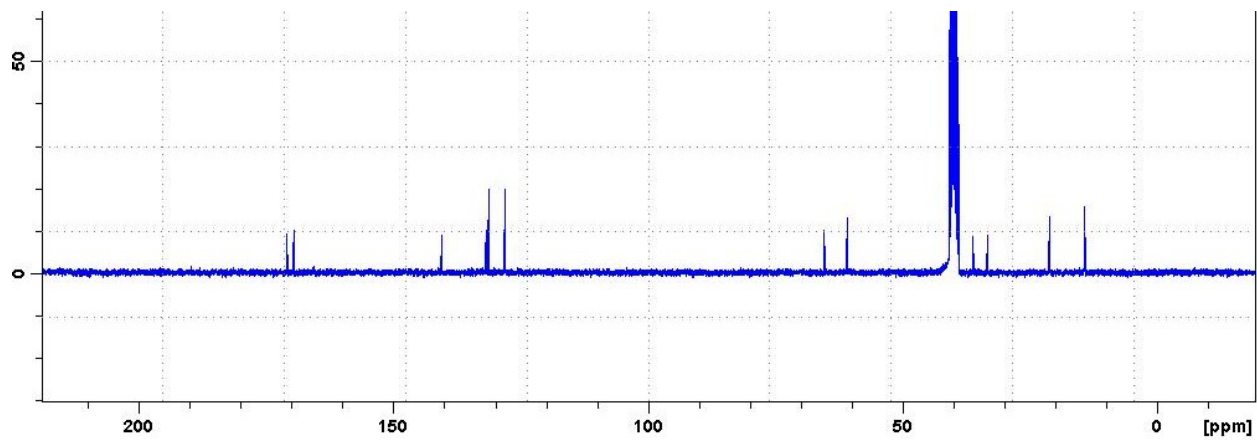

# Ethyl [2-(2,4,6-trimethylanilino)-4,5-dihydro-1,3-thiazol-4-yl]acetate (3)

<sup>1</sup>H NMR of 3

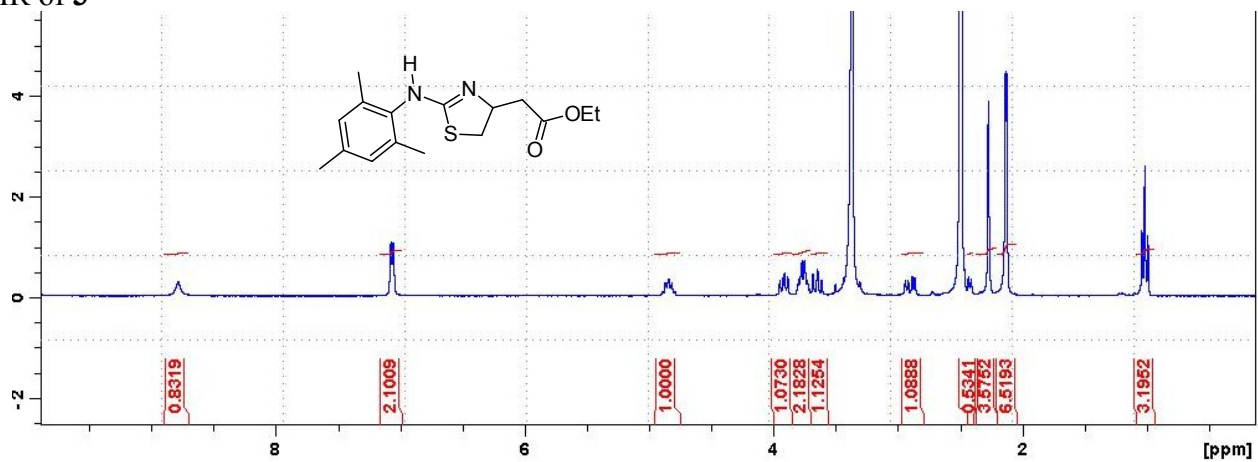

<sup>13</sup>C NMR of 3

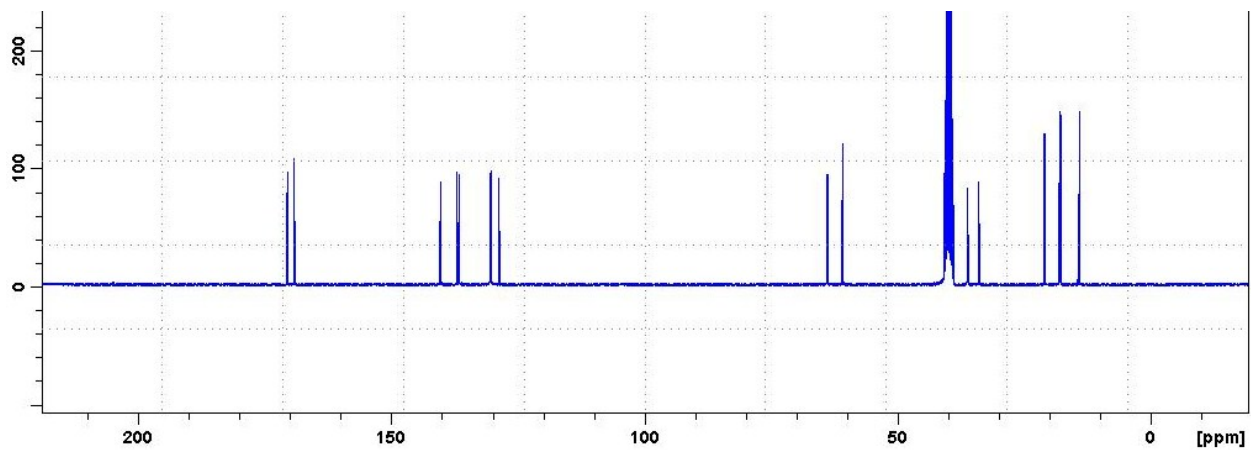



# Ethyl [2-(2,4-dimethoxyanilino)-4,5-dihydro-1,3-thiazol-4-yl]acetate (4)

<sup>1</sup>H NMR of 4

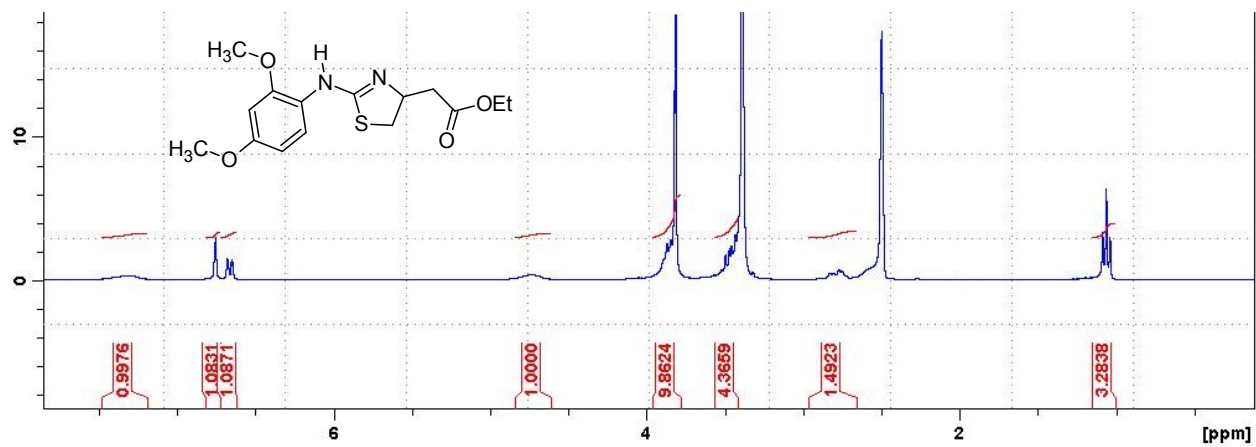

<sup>13</sup>C NMR of 4

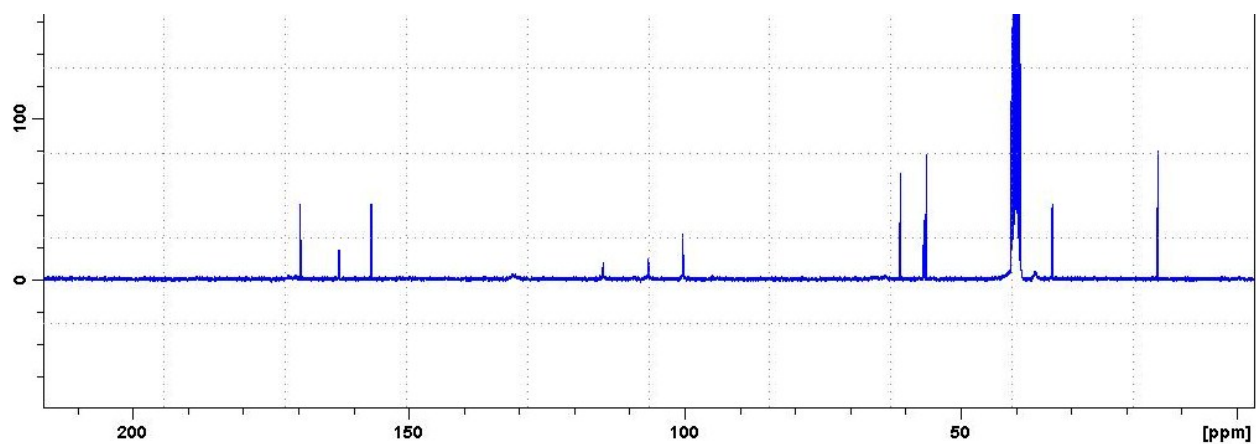

# Ethyl [2-(2-fluoroanilino)-4,5-dihydro-1,3-thiazol-4-yl]acetate (5)

<sup>1</sup>H NMR of 5

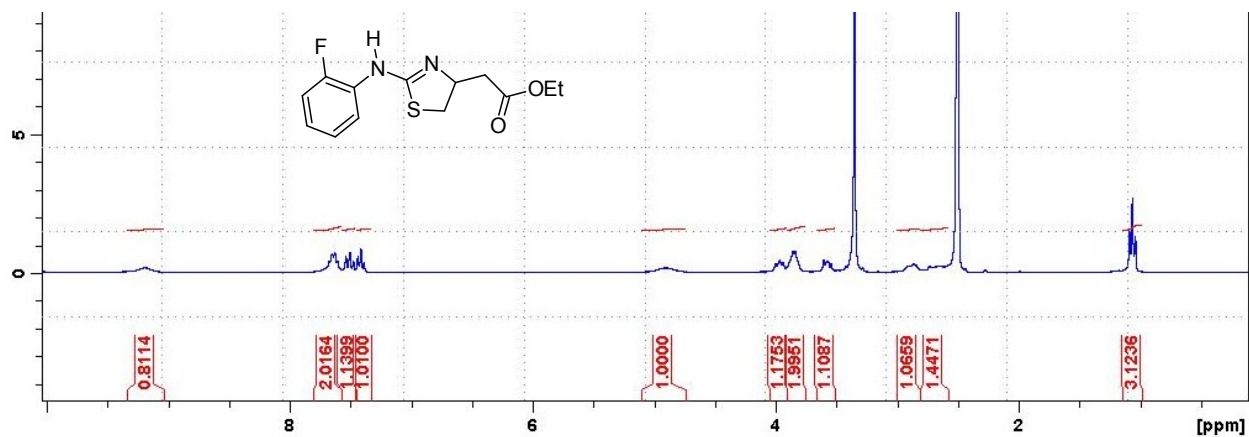

<sup>13</sup>C NMR of 5

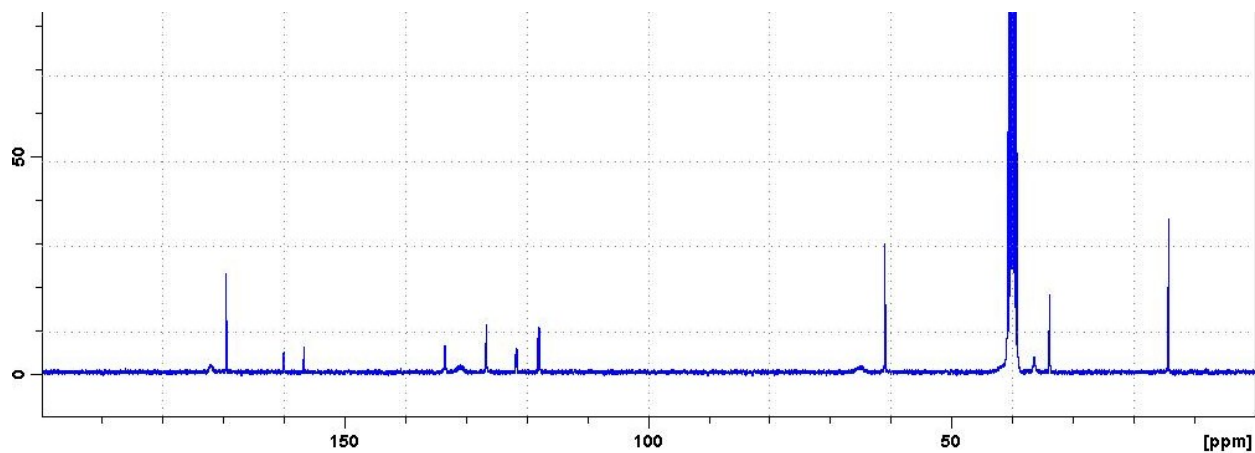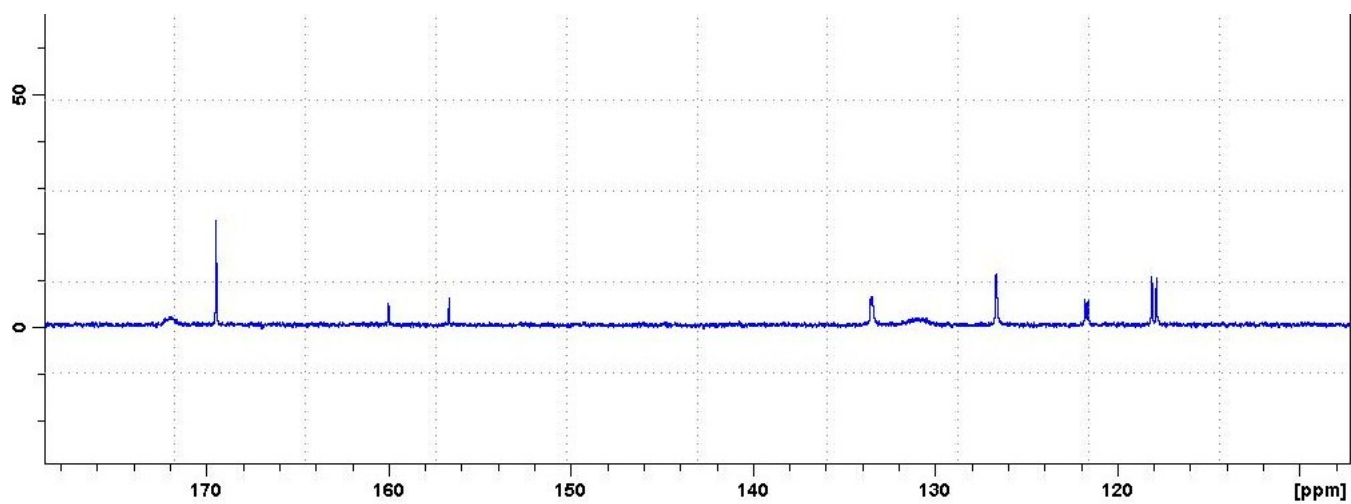

# Ethyl [2-(3-fluoroanilino)-4,5-dihydro-1,3-thiazol-4-yl]acetate (6)

<sup>1</sup>H NMR of 6

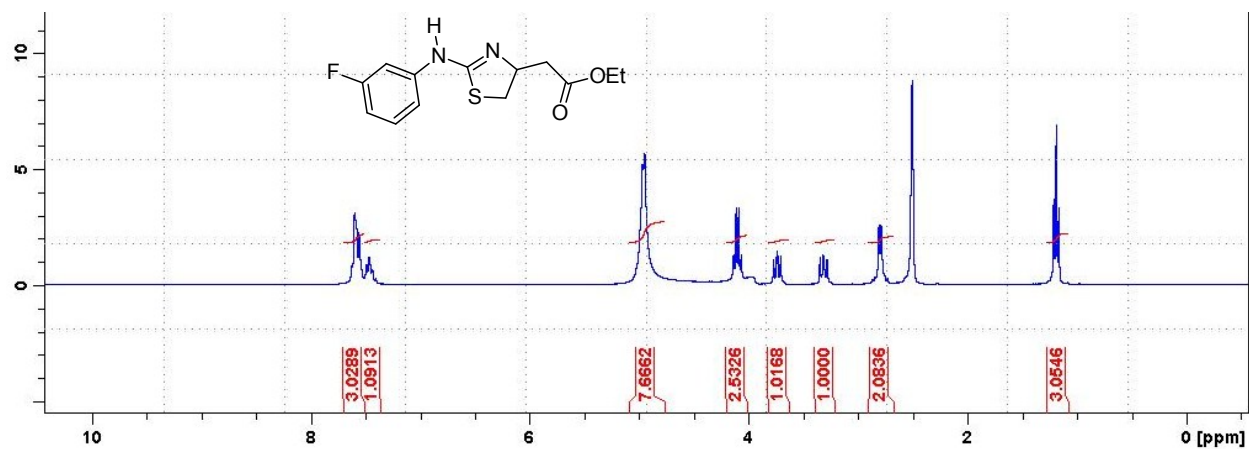

<sup>13</sup>C NMR of 6

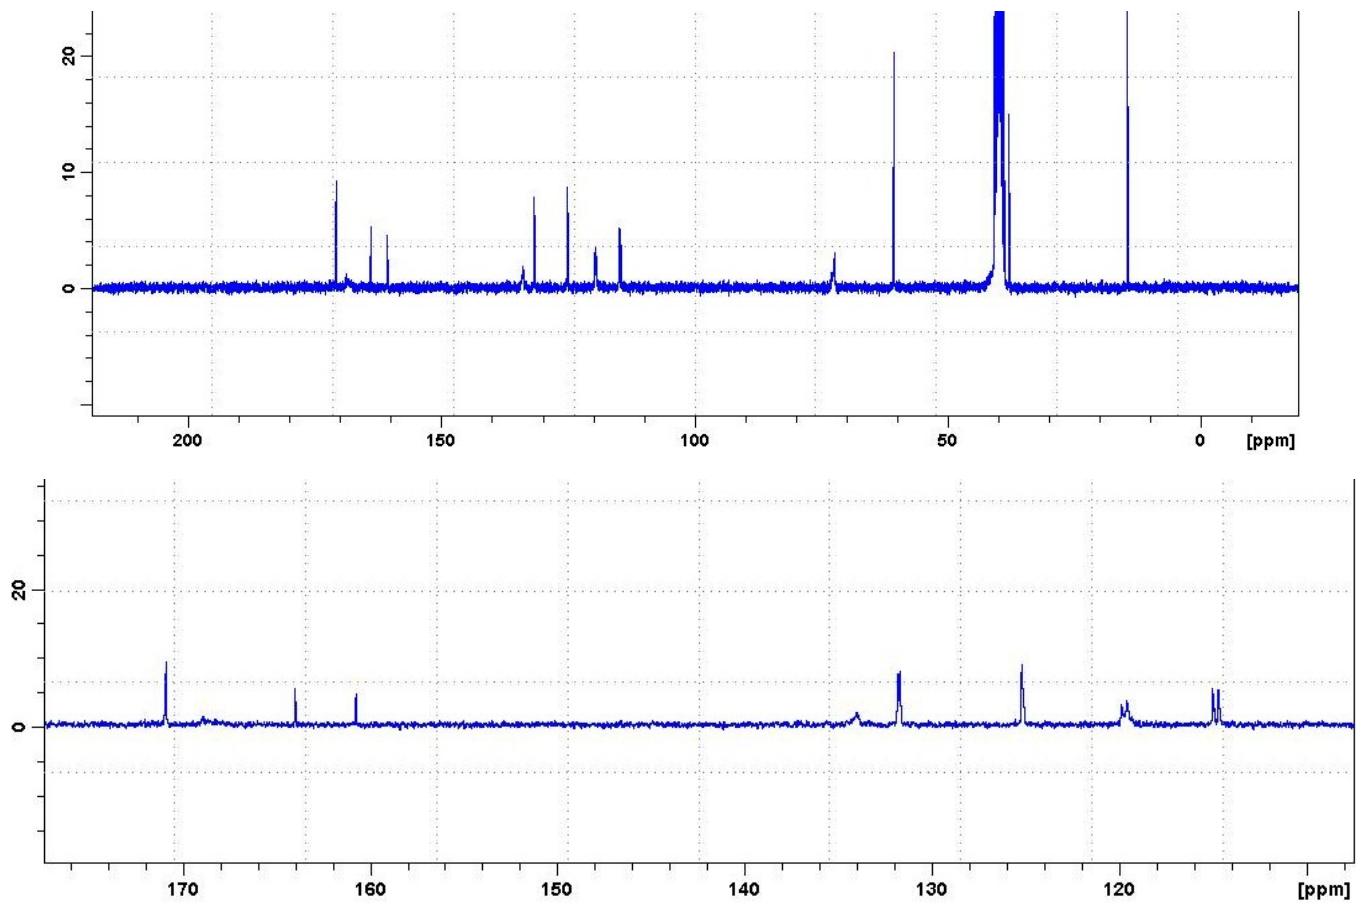

Ethyl [2-(4-chloroanilino)-4,5-dihydro-1,3-thiazol-4-yl]acetate (7)

<sup>1</sup>H NMR of 7

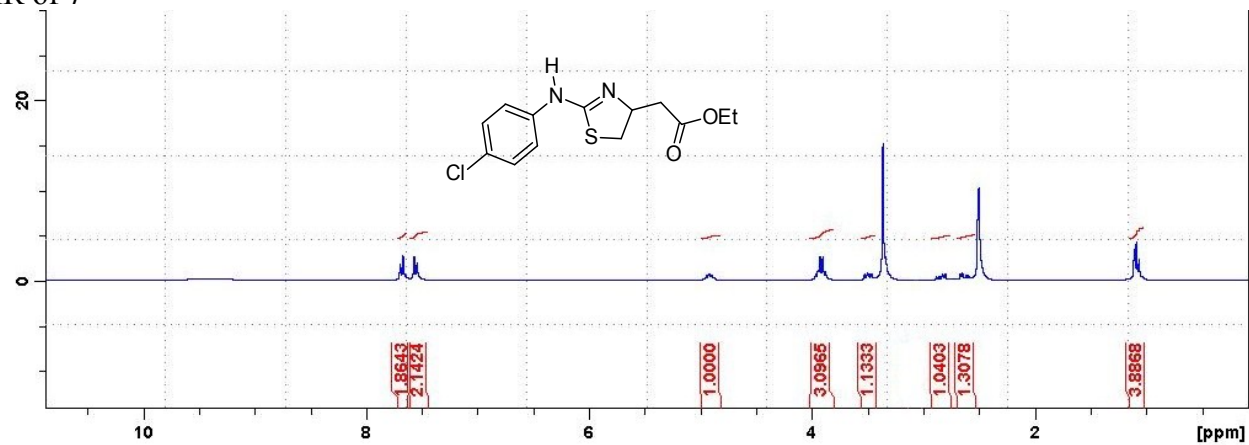

<sup>13</sup>C NMR of 7

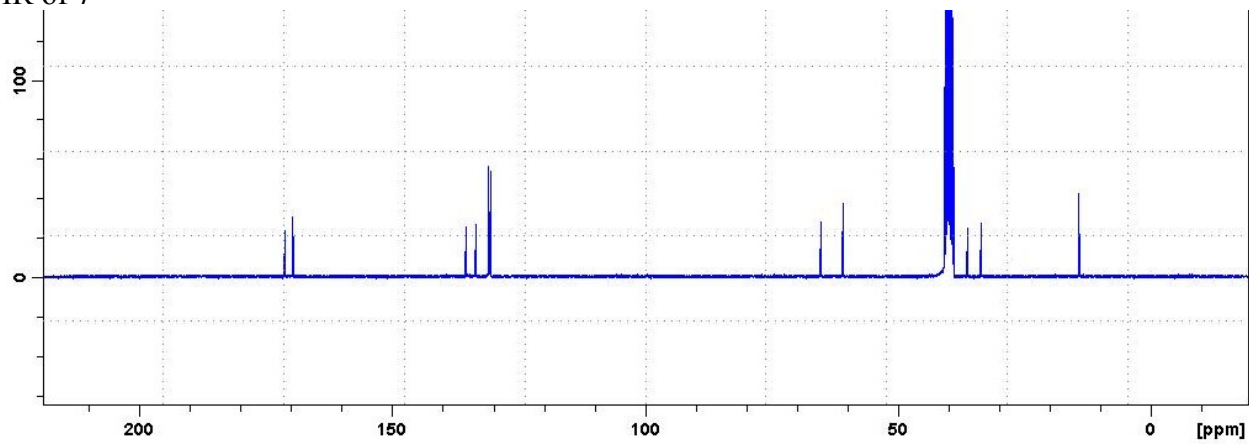

Ethyl {2-[3-(trifluoromethyl)anilino]-4,5-dihydro-1,3-thiazol-4-yl}acetate (8)

<sup>1</sup>H NMR of 8

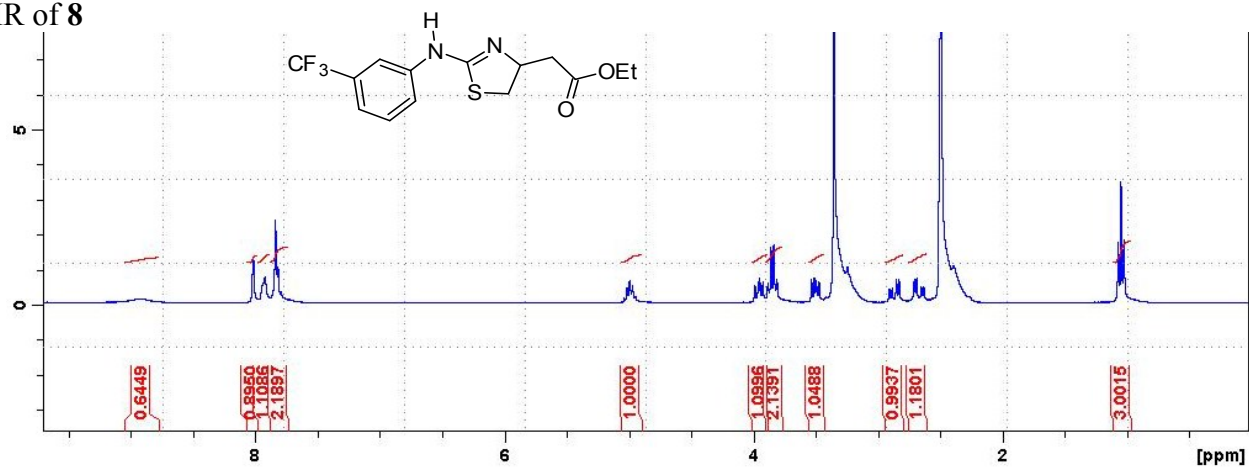

<sup>13</sup>C NMR of 8

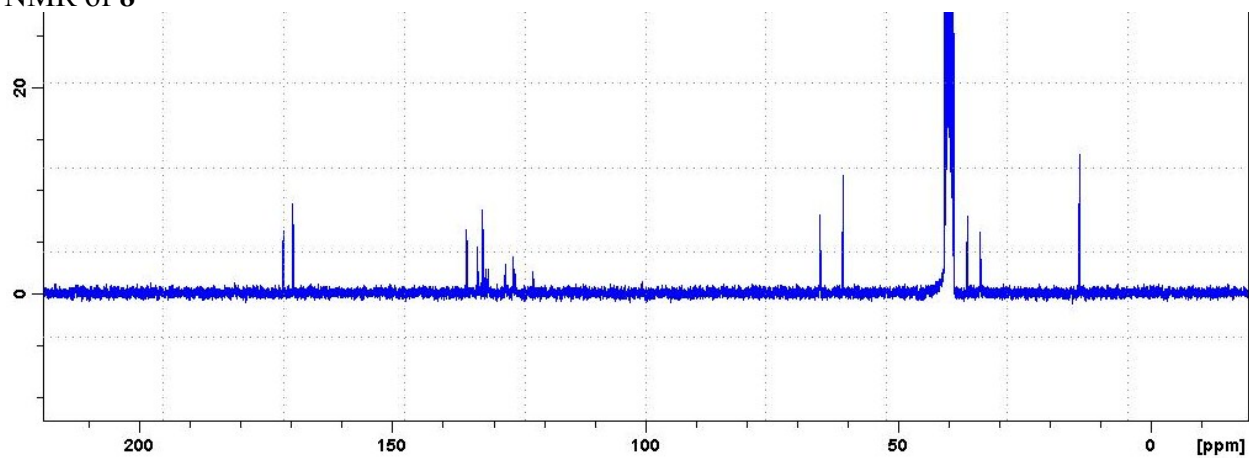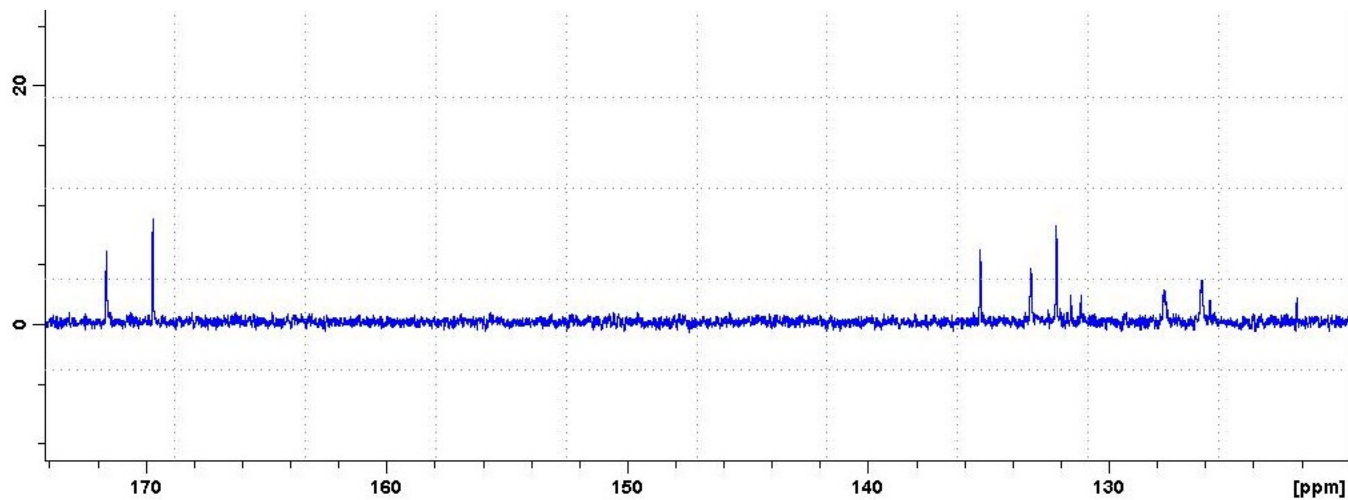

# Ethyl {2-[3,5-bis(trifluoromethyl)anilino]-4,5-dihydro-1,3-thiazol-4-yl}acetate (9)

<sup>1</sup>H NMR of 9

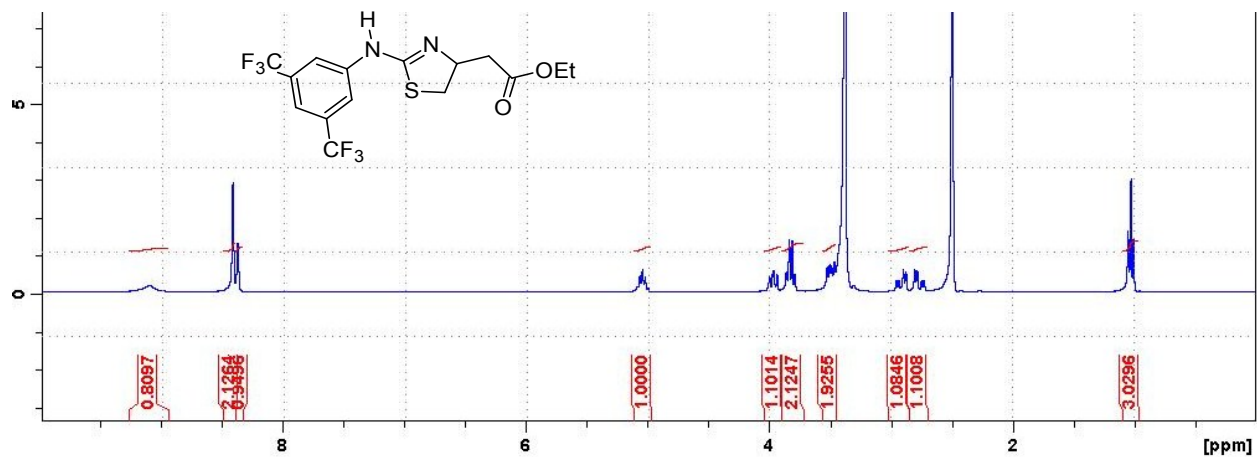

<sup>13</sup>C NMR of 9

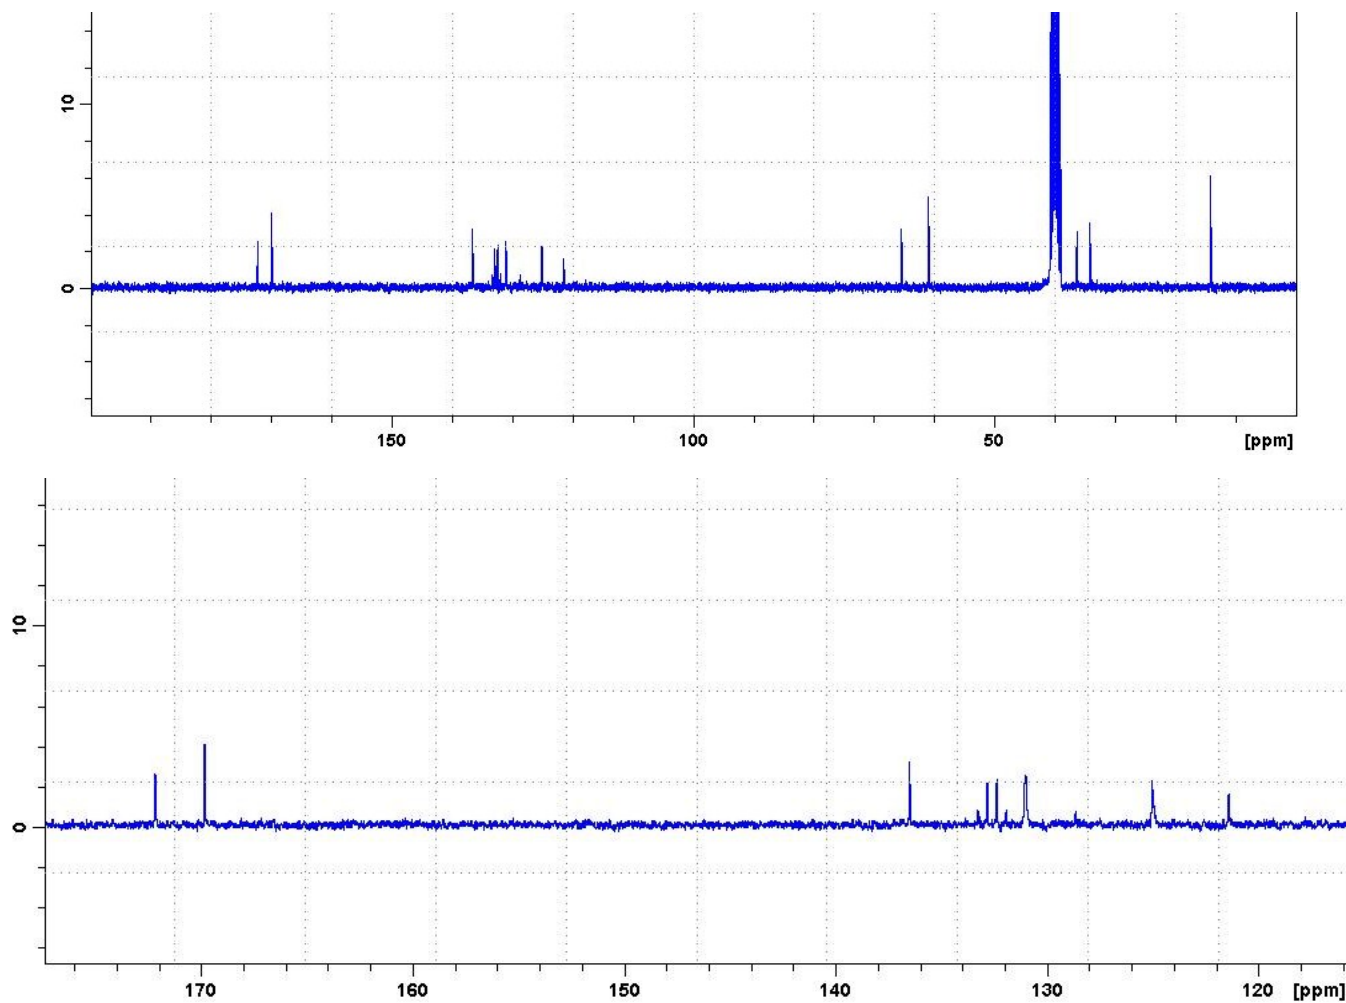



4-{{4-(2-Ethoxy-2-oxoethyl)-4,5-dihydro-1,3-thiazol-2-yl}amino}benzoic acid (10)

<sup>1</sup>H NMR of 10

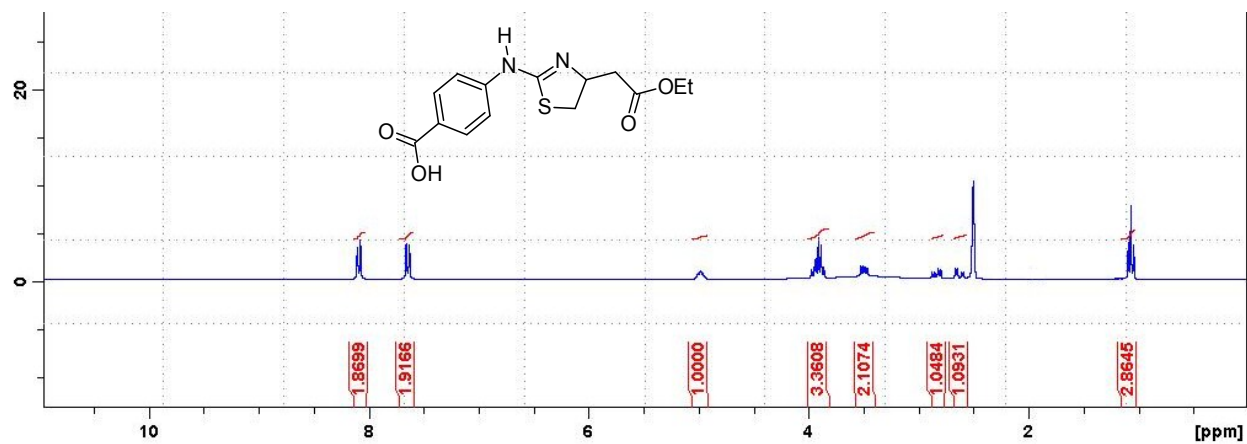

<sup>13</sup>C NMR of 10

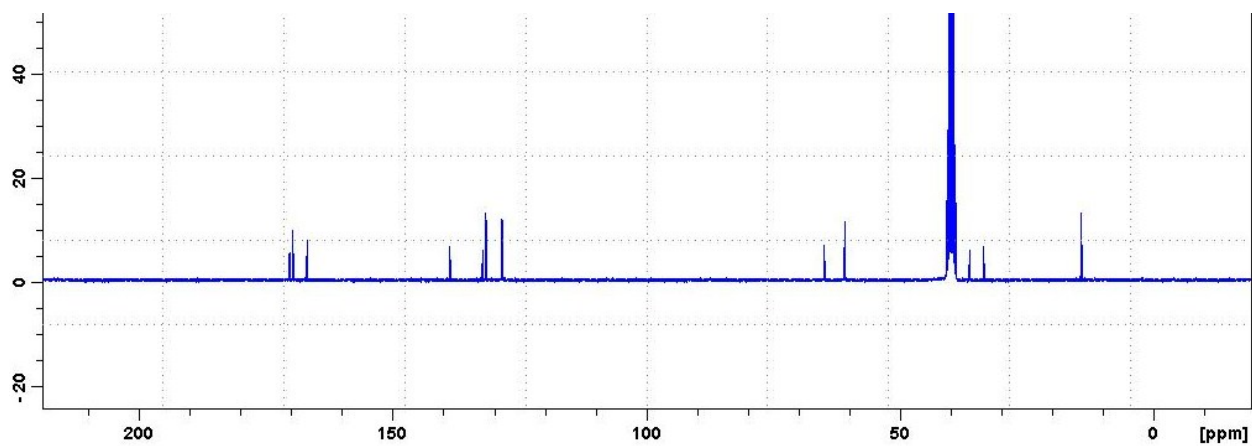

# Ethyl [2-(benzylamino)-4,5-dihydro-1,3-thiazol-4-yl]acetate (11)

<sup>1</sup>H NMR of **11**

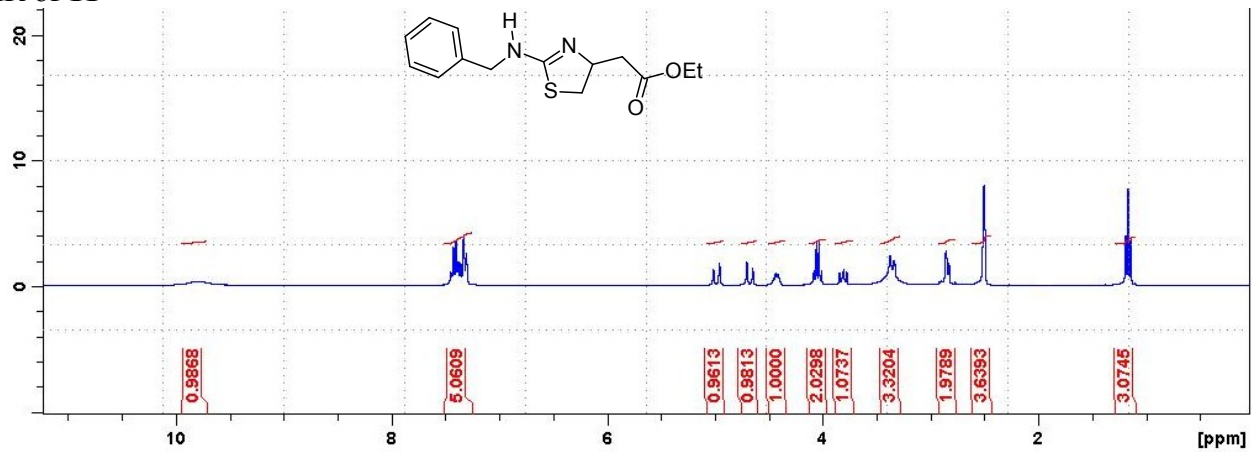

<sup>13</sup>C NMR of **11**

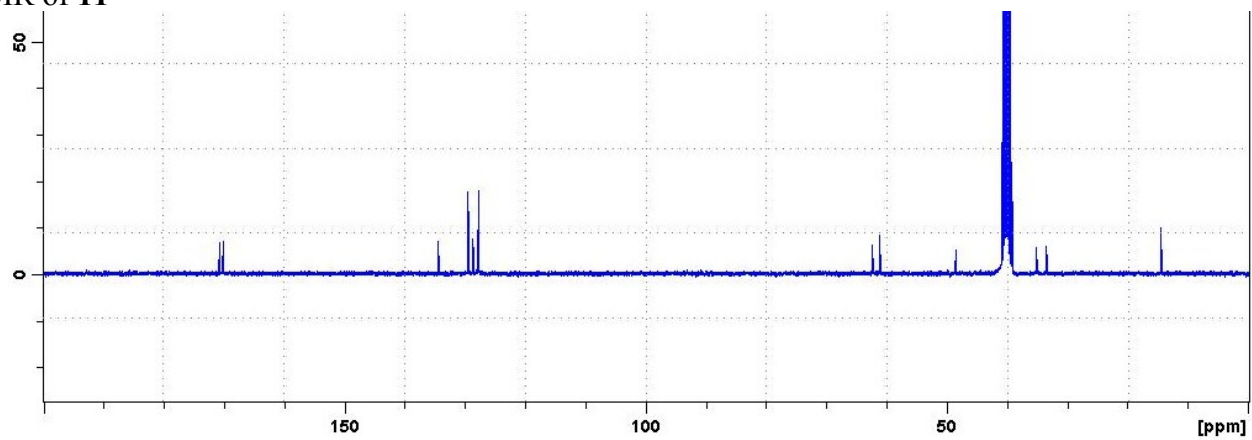



Ethyl {2-[(prop-2-en-1-yl)amino]-4,5-dihydro-1,3-thiazol-4-yl}acetate (12)

<sup>1</sup>H NMR of 12

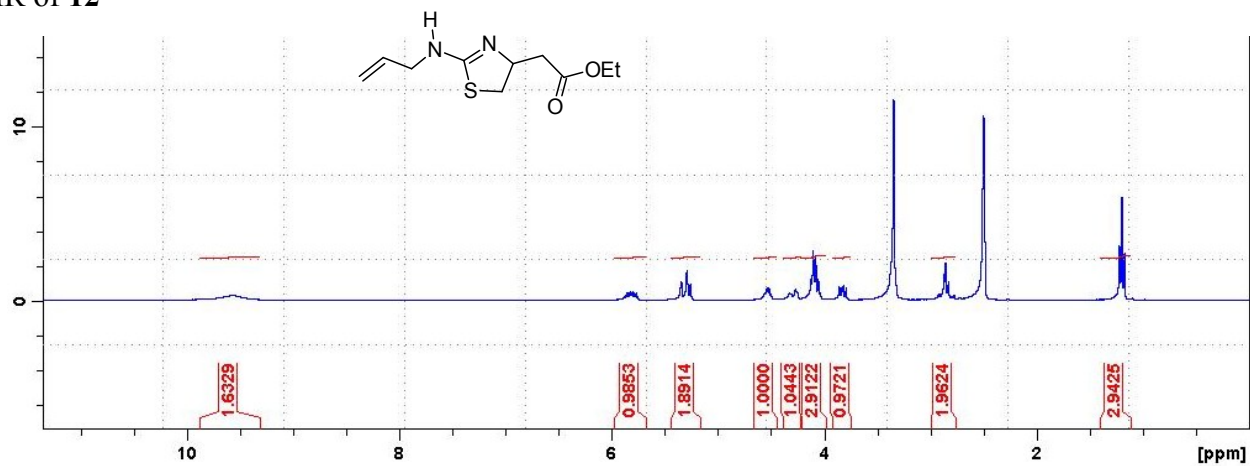

<sup>13</sup>C NMR of 12

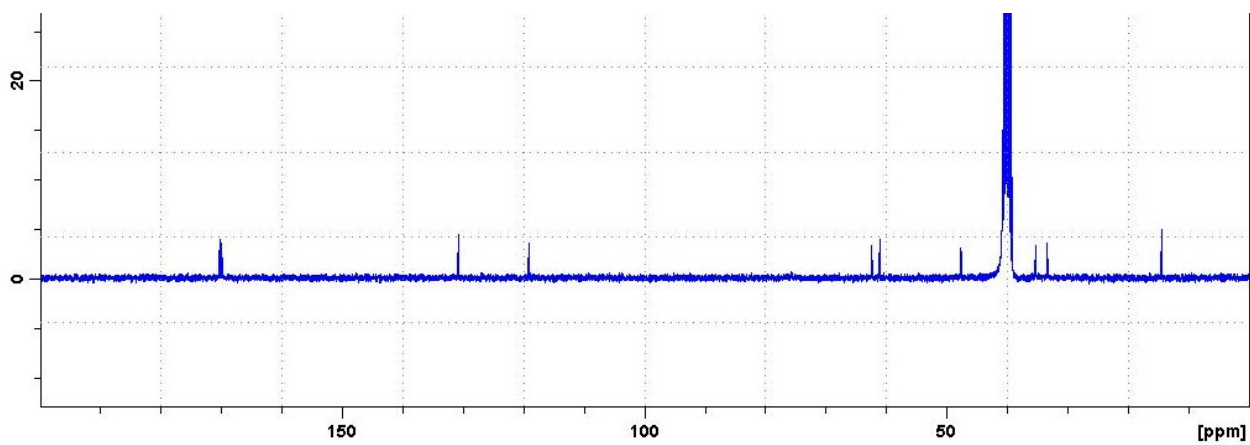

# Ethyl (2-amino-4,5-dihydro-1,3-thiazol-4-yl)acetate (13)

$^1\text{H}$  NMR of 13

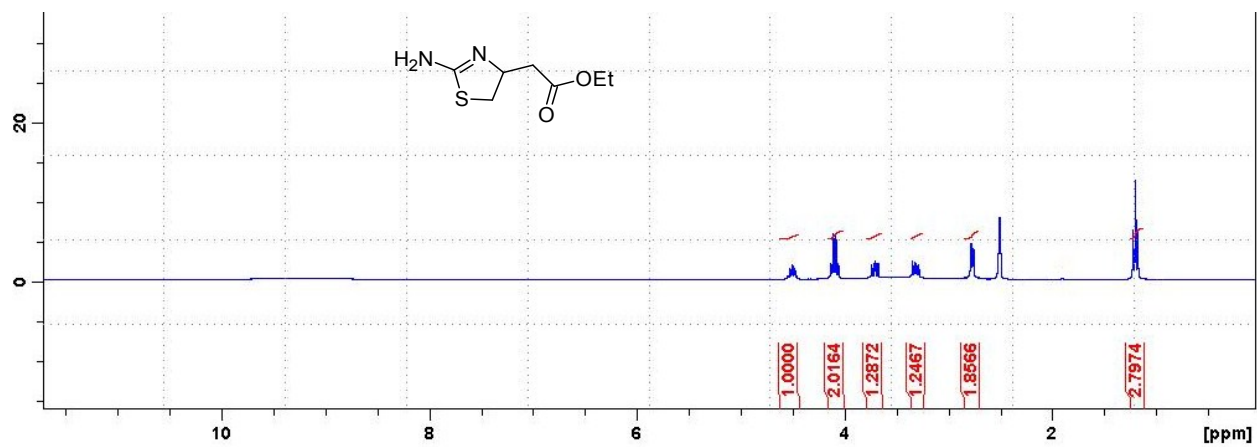

$^{13}\text{C}$  NMR of 13

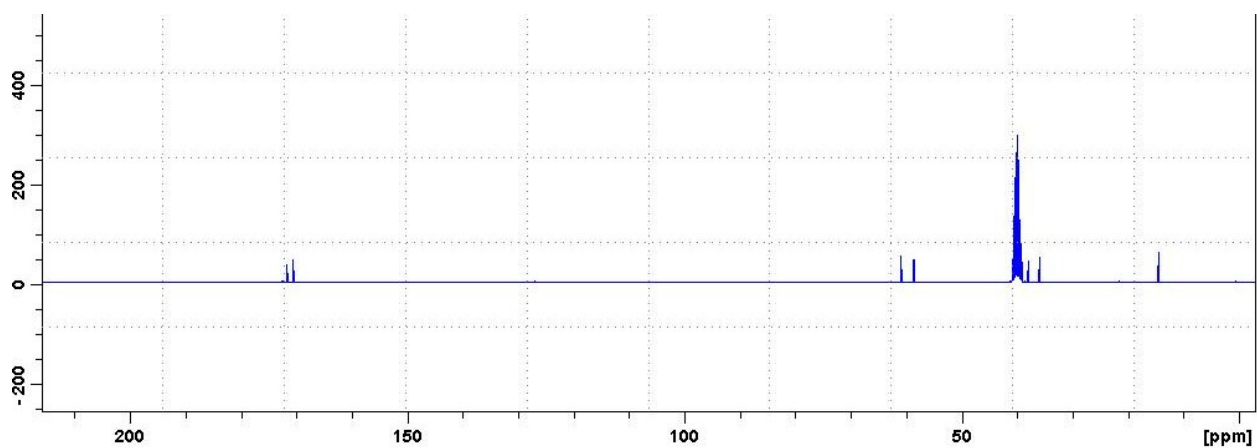

# Ethyl [2-(3-methoxyphenyl)-4,5-dihydro-1,3-thiazol-4-yl]acetate (14)

<sup>1</sup>H NMR of 14

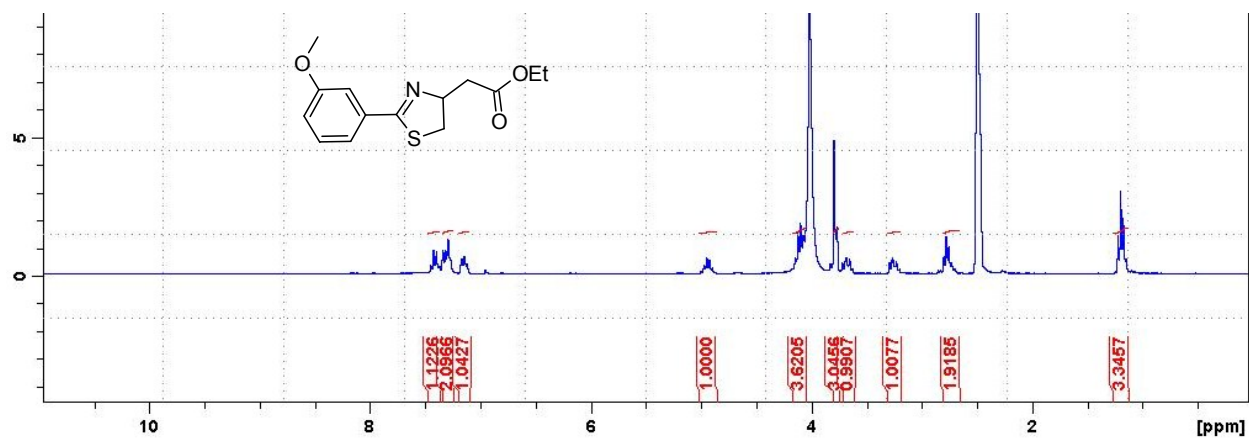

<sup>13</sup>C NMR of 14

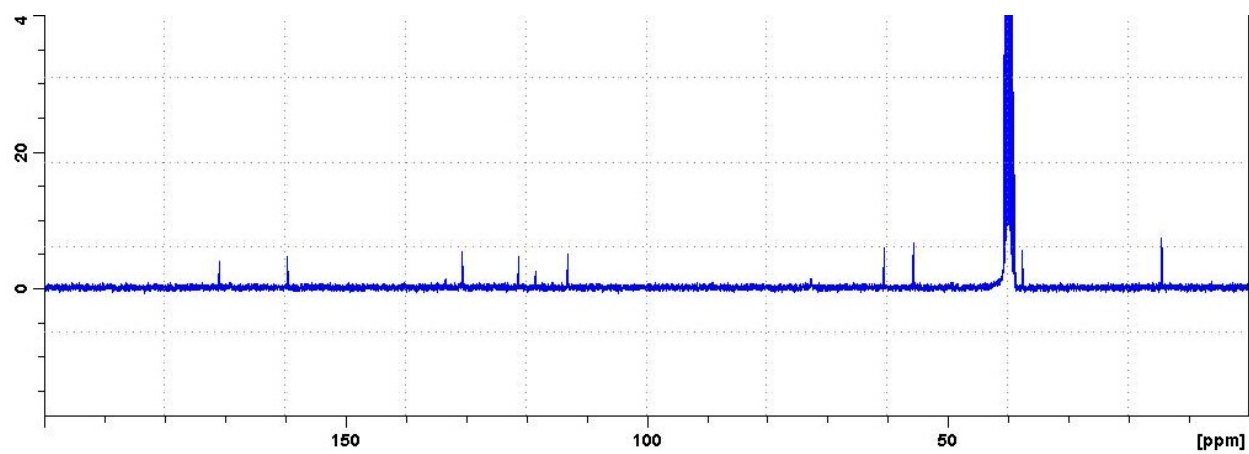

# Ethyl [2-(2-hydroxyphenyl)-4,5-dihydro-1,3-thiazol-4-yl]acetate (15)

<sup>1</sup>H NMR of 15

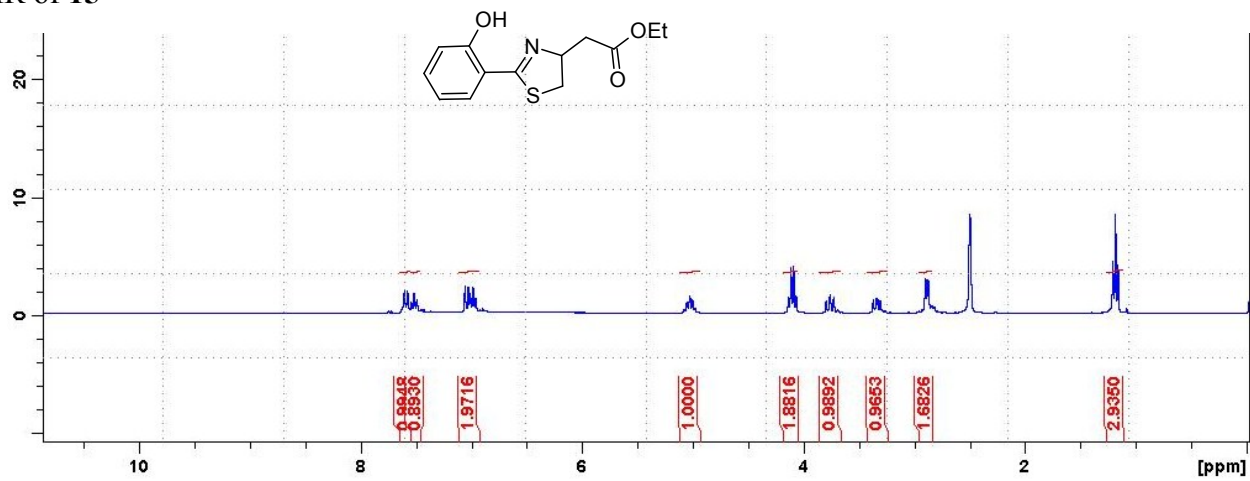

<sup>13</sup>C NMR of 15

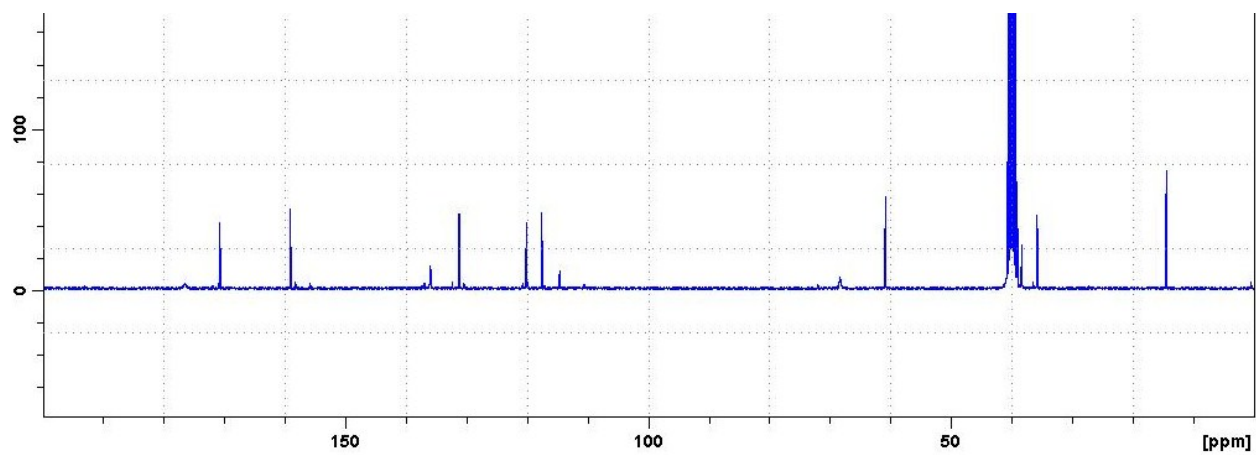

# Ethyl [2-(4-hydroxyphenyl)-4,5-dihydro-1,3-thiazol-4-yl]acetate (16)

<sup>1</sup>H NMR of 16

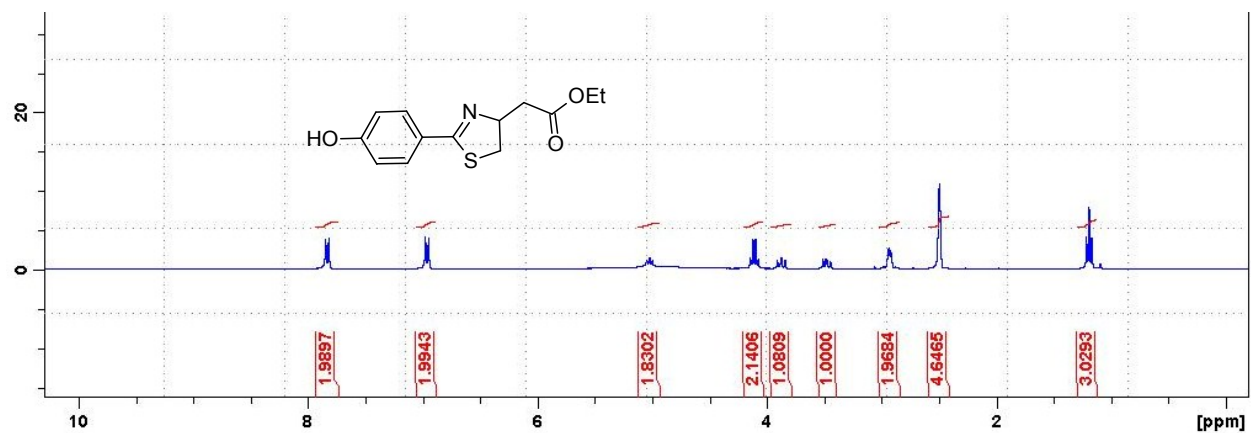

<sup>13</sup>C NMR of 16

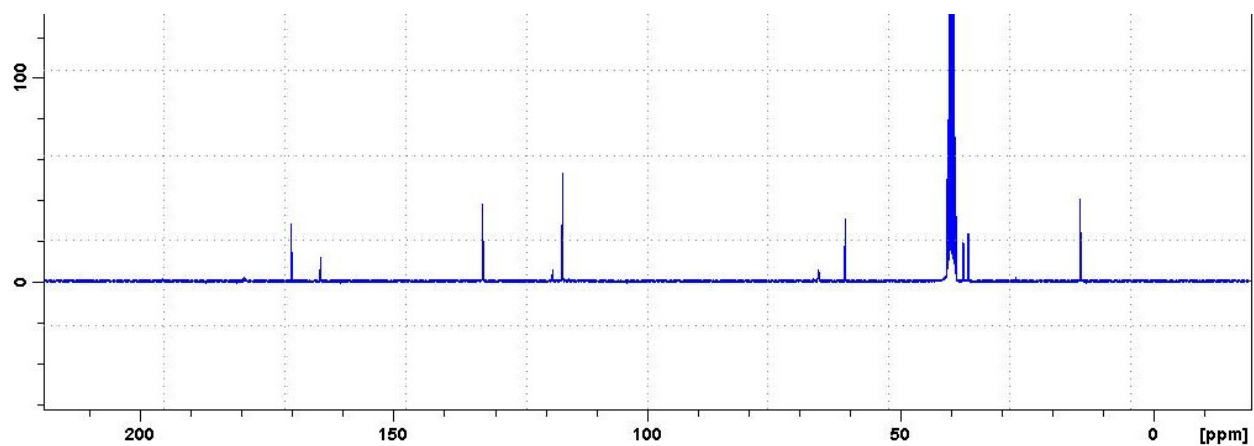

Ethyl [2-(4-methylphenyl)-4,5-dihydro-1,3-thiazol-4-yl]acetate (17)

<sup>1</sup>H NMR of 17

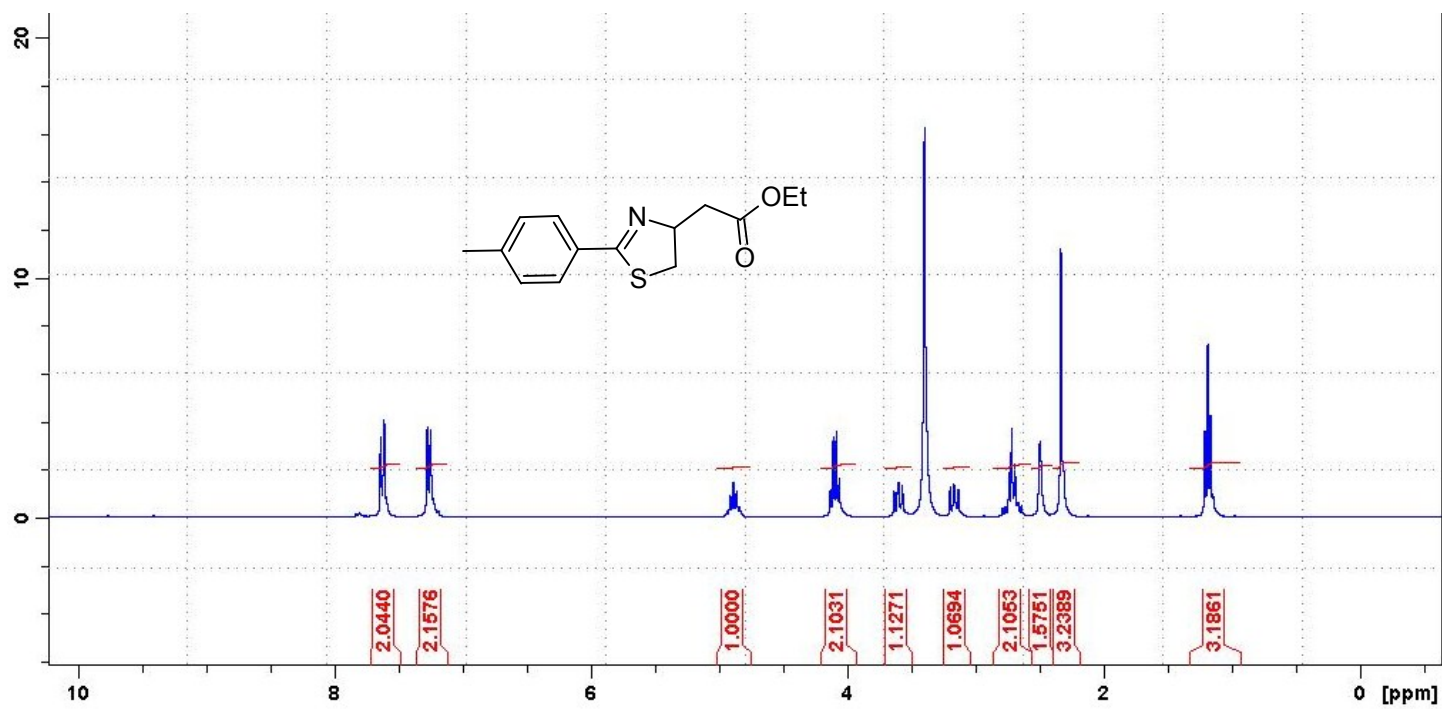

<sup>13</sup>C NMR of 17

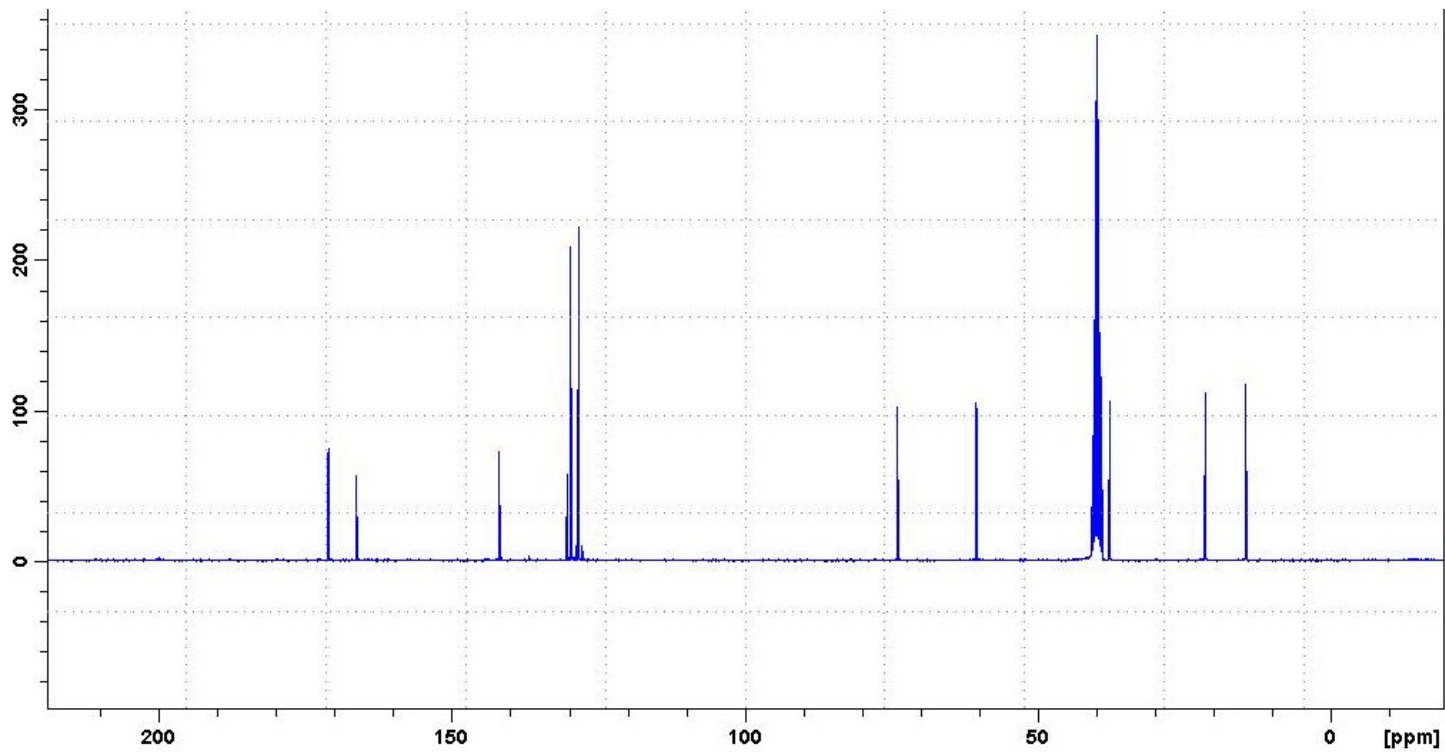

# Ethyl [2-(4-fluorophenyl)-4,5-dihydro-1,3-thiazol-4-yl]acetate (18)

<sup>1</sup>H NMR of 18

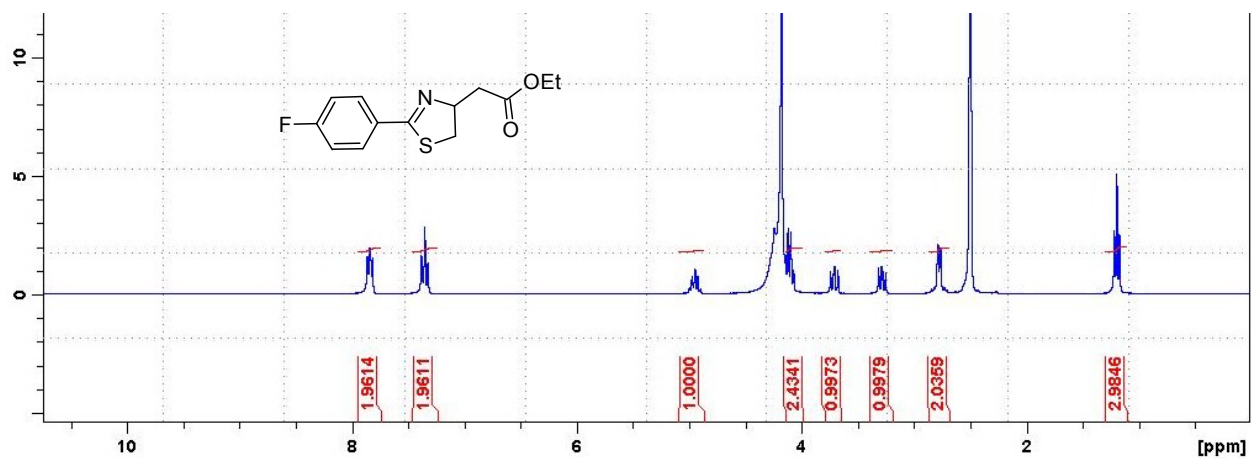

<sup>13</sup>C NMR of 18

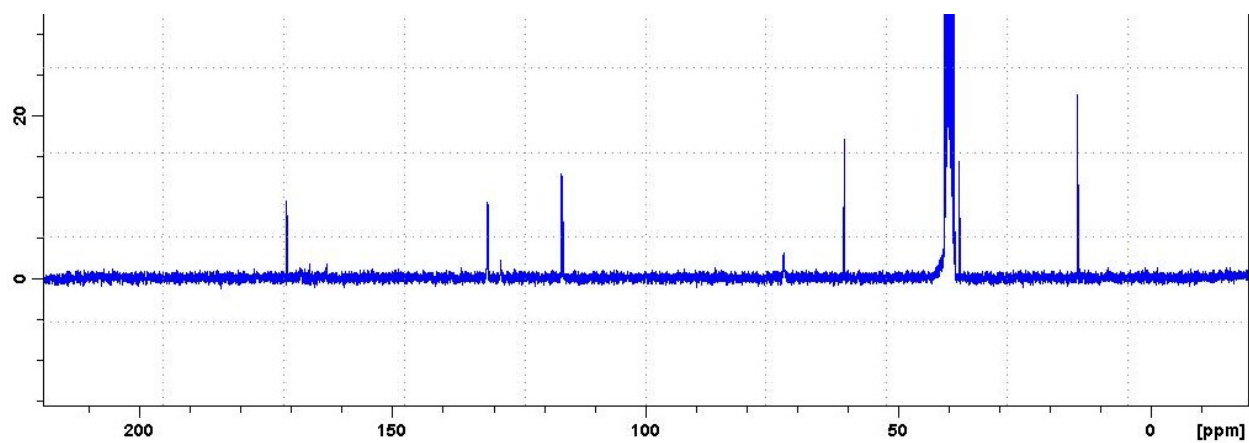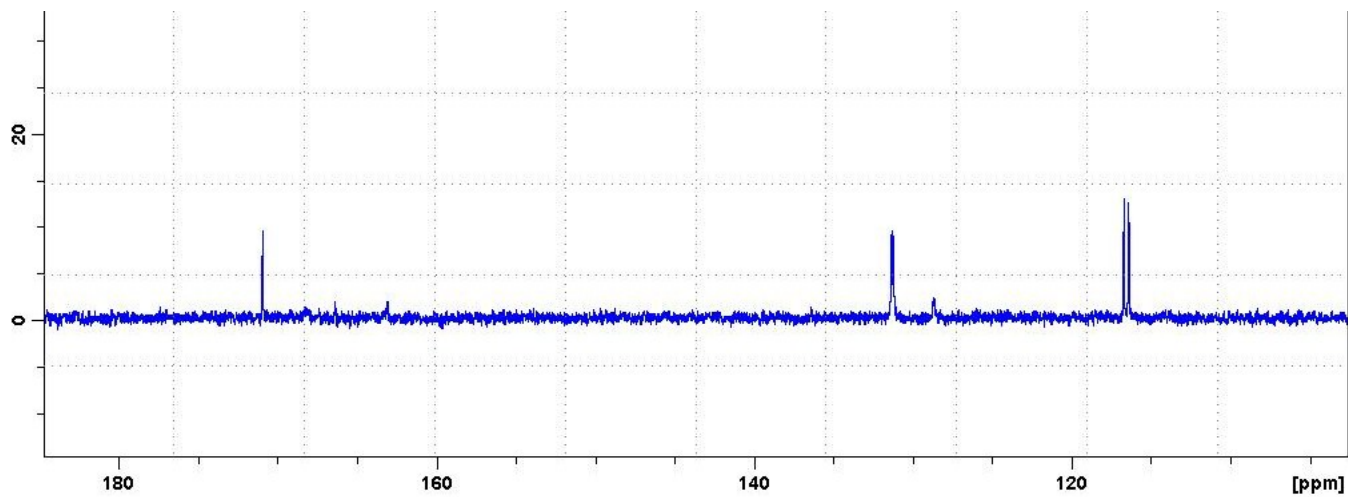



# Ethyl [2-(3-chlorophenyl)-4,5-dihydro-1,3-thiazol-4-yl]acetate (19)

<sup>1</sup>H NMR of 19

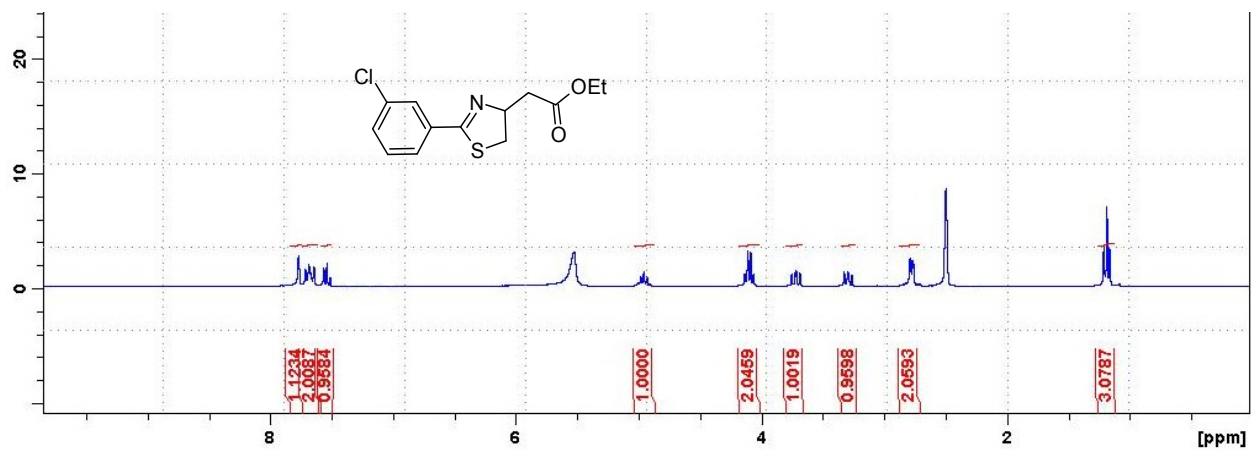

<sup>13</sup>C NMR of 19

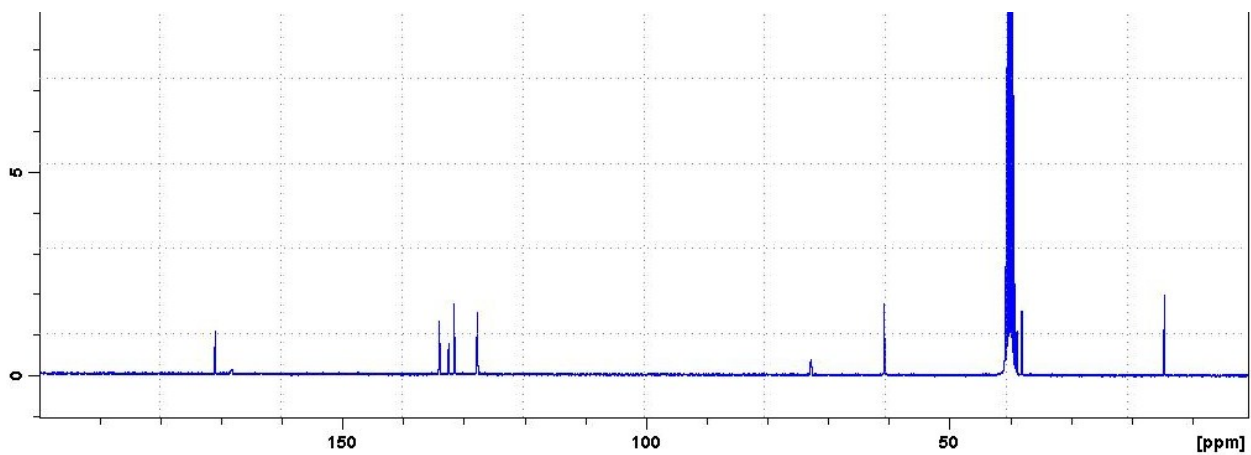



# Ethyl [2-(4-chlorophenyl)-4,5-dihydro-1,3-thiazol-4-yl]acetate (20)

<sup>1</sup>H NMR of 20

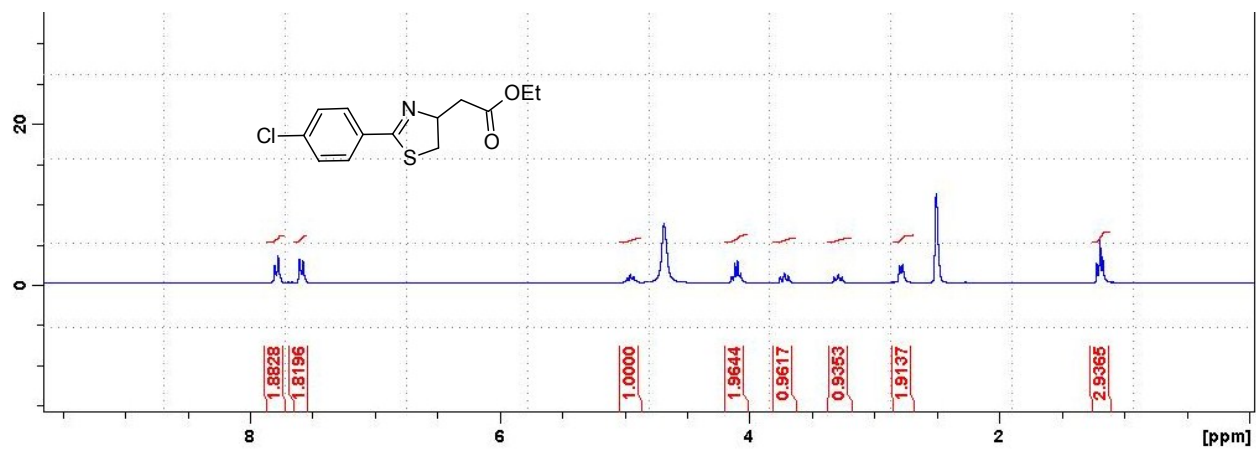

<sup>13</sup>C NMR of 20

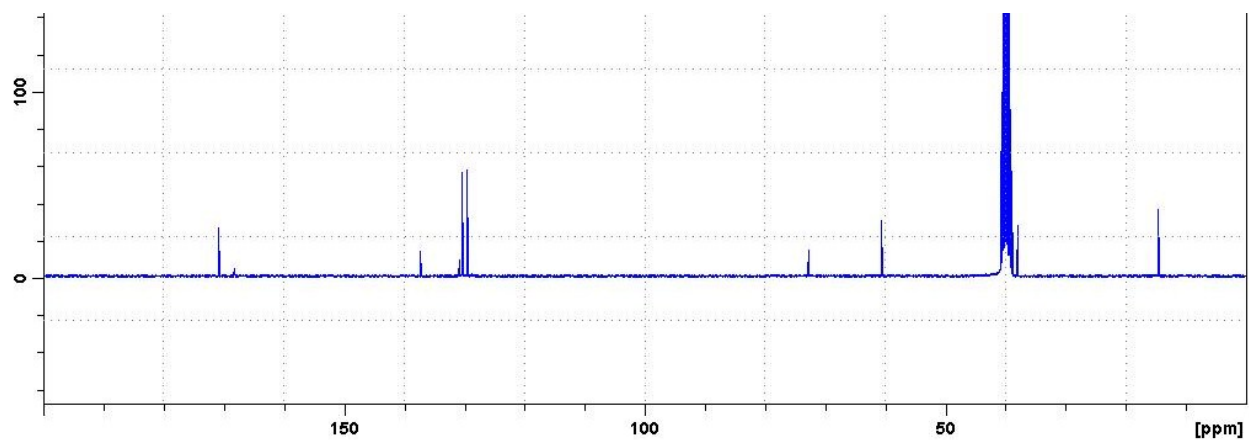

# Ethyl {2-[4-(trifluoromethyl)phenyl]-4,5-dihydro-1,3-thiazol-4-yl}acetate (21)

<sup>1</sup>H NMR of 21

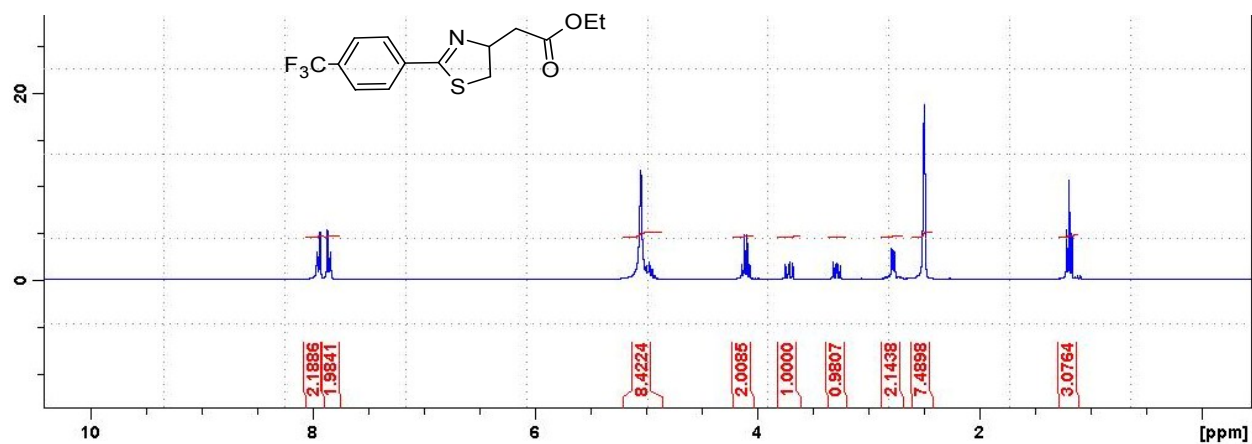

<sup>13</sup>C NMR of 21

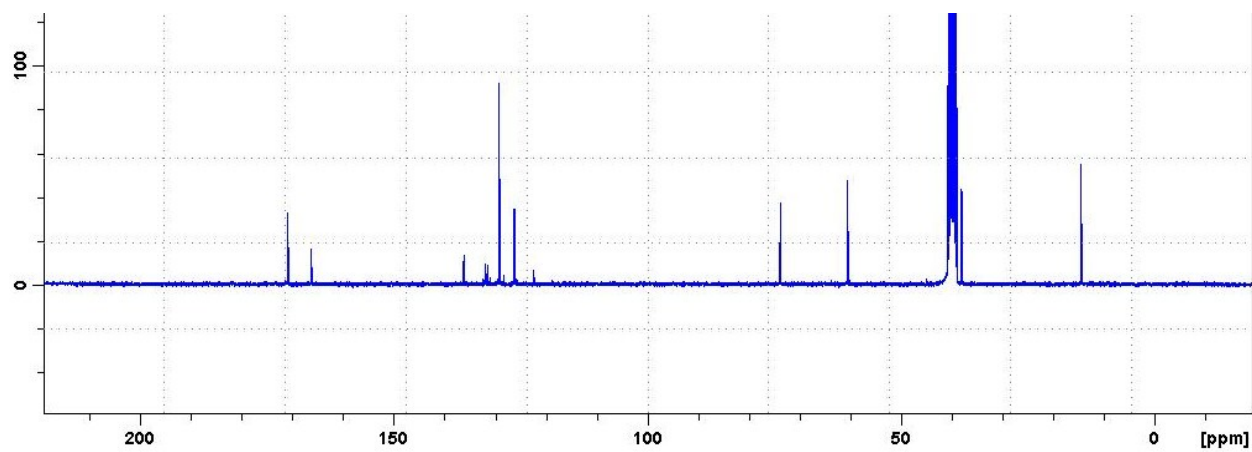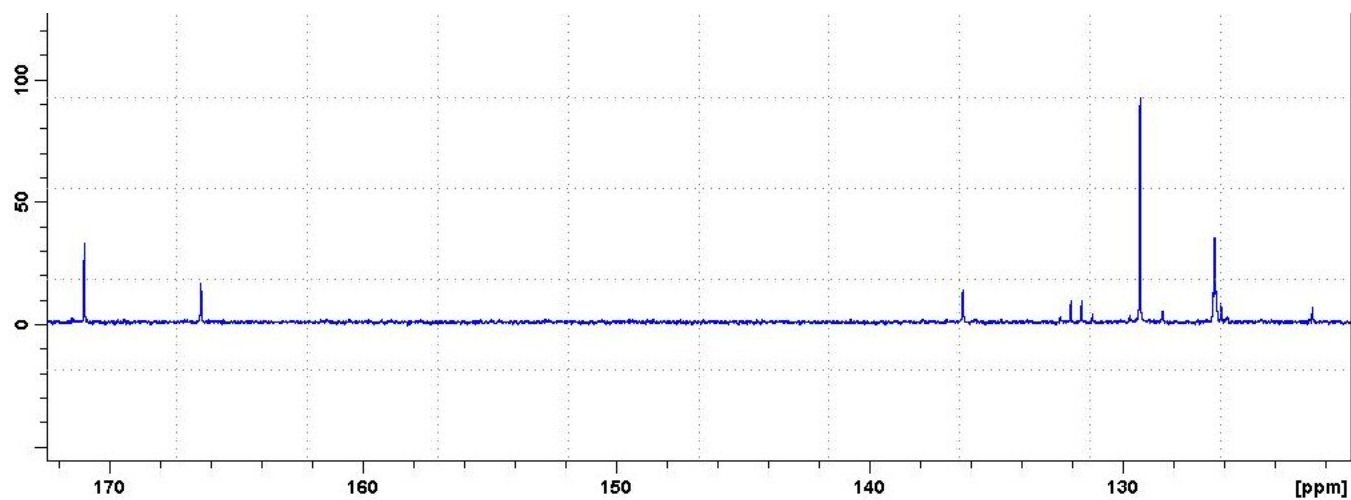

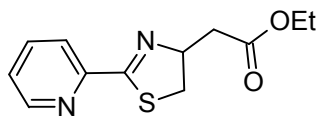

Ethyl [2-(XXXyridine-2-yl)-4,5-dihydro-1,3-thiazol-4-yl]acetate (22)

$^1\text{H}$  NMR of 22

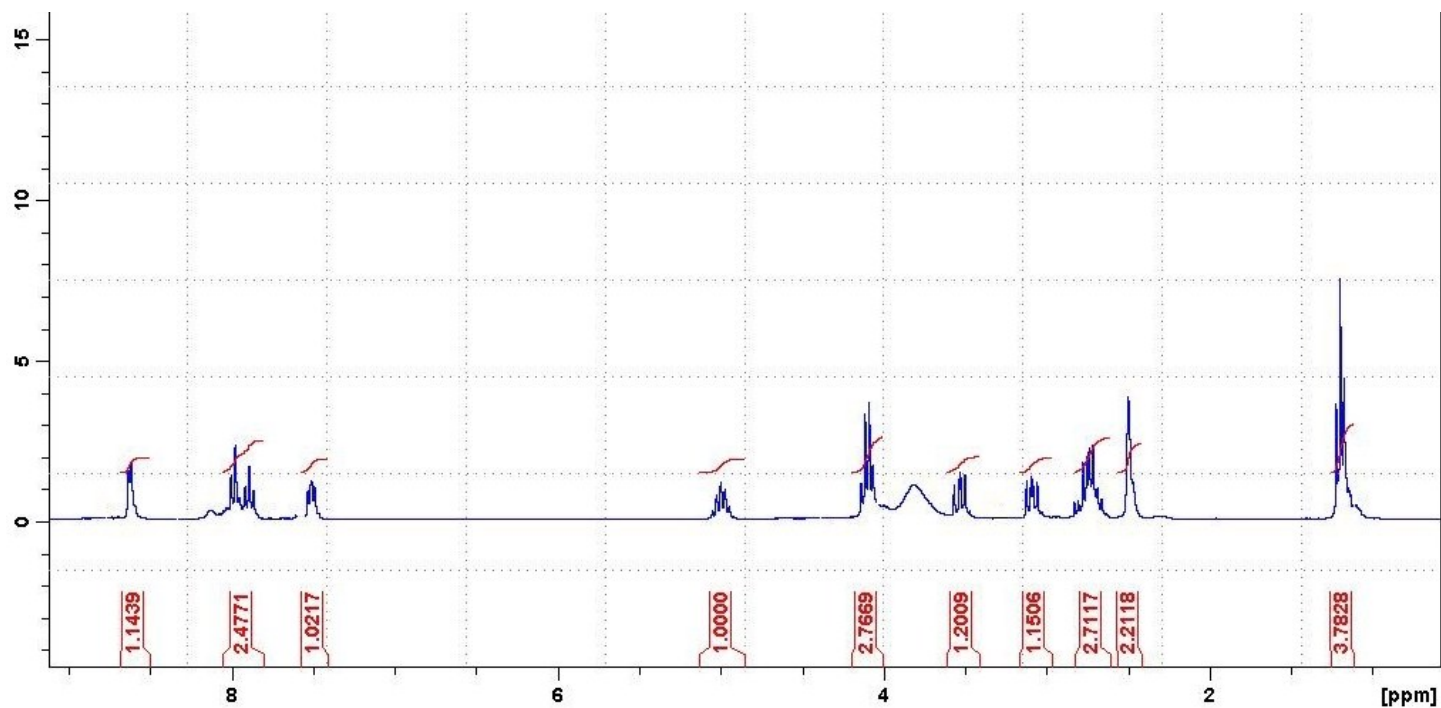

$^{13}\text{C}$  NMR of 22

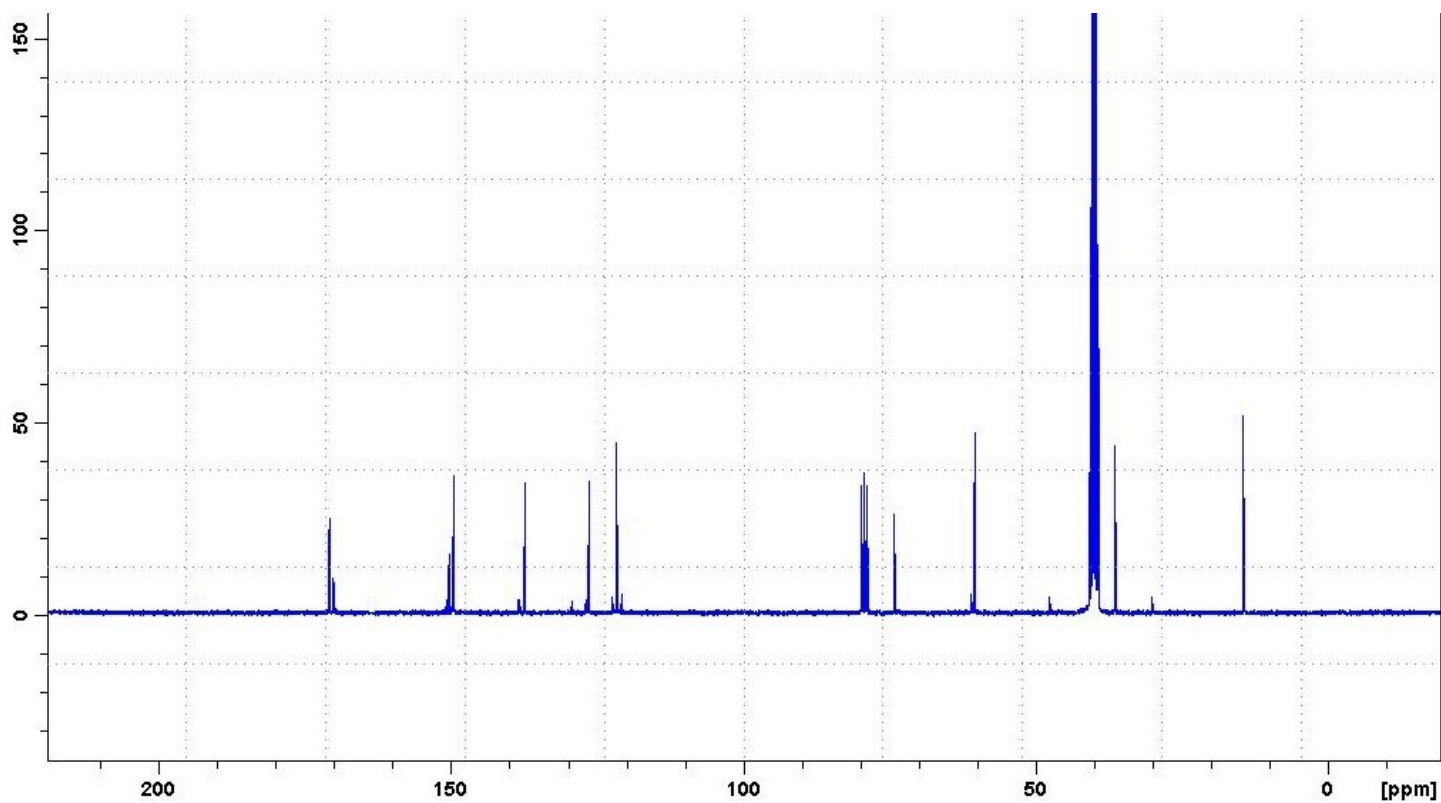

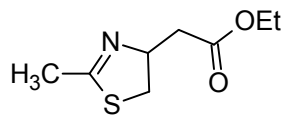

Ethyl (2-methyl-4,5-dihydro-1,3-thiazol-4-yl)acetate (23)

<sup>1</sup>H NMR of 23

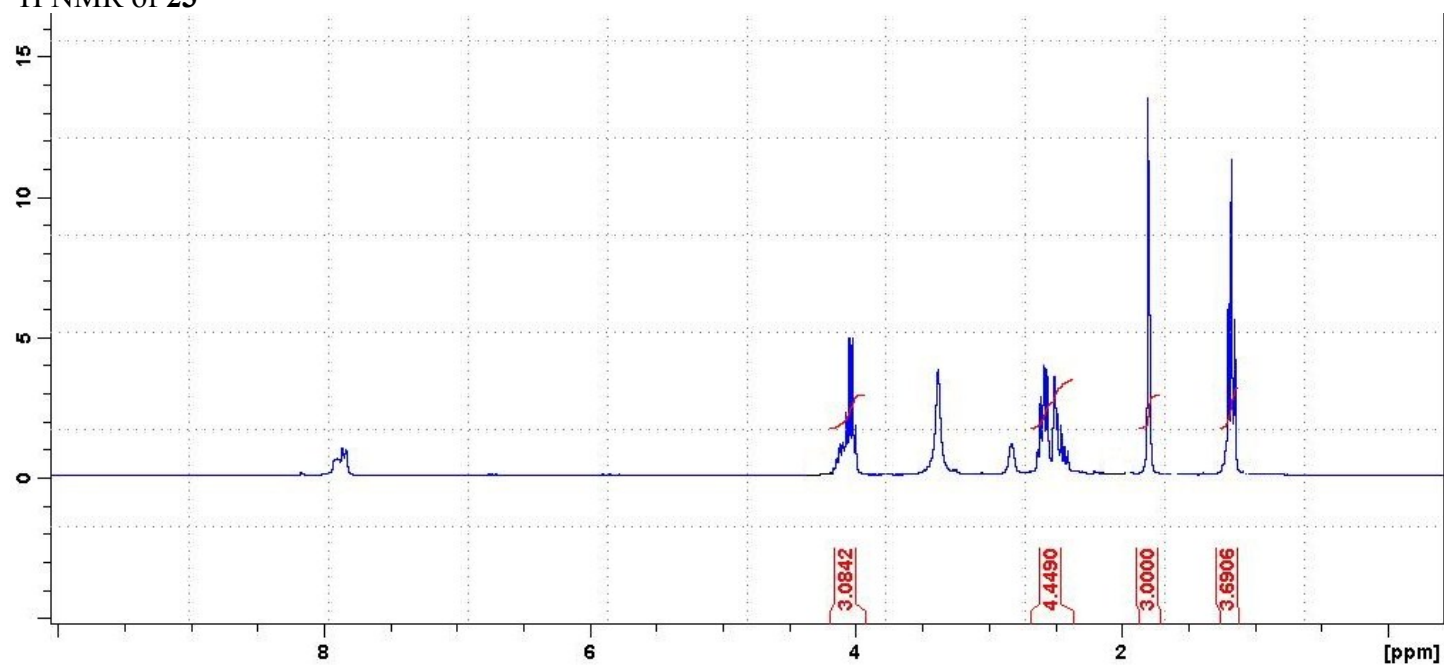

<sup>1</sup>H NMR of 23

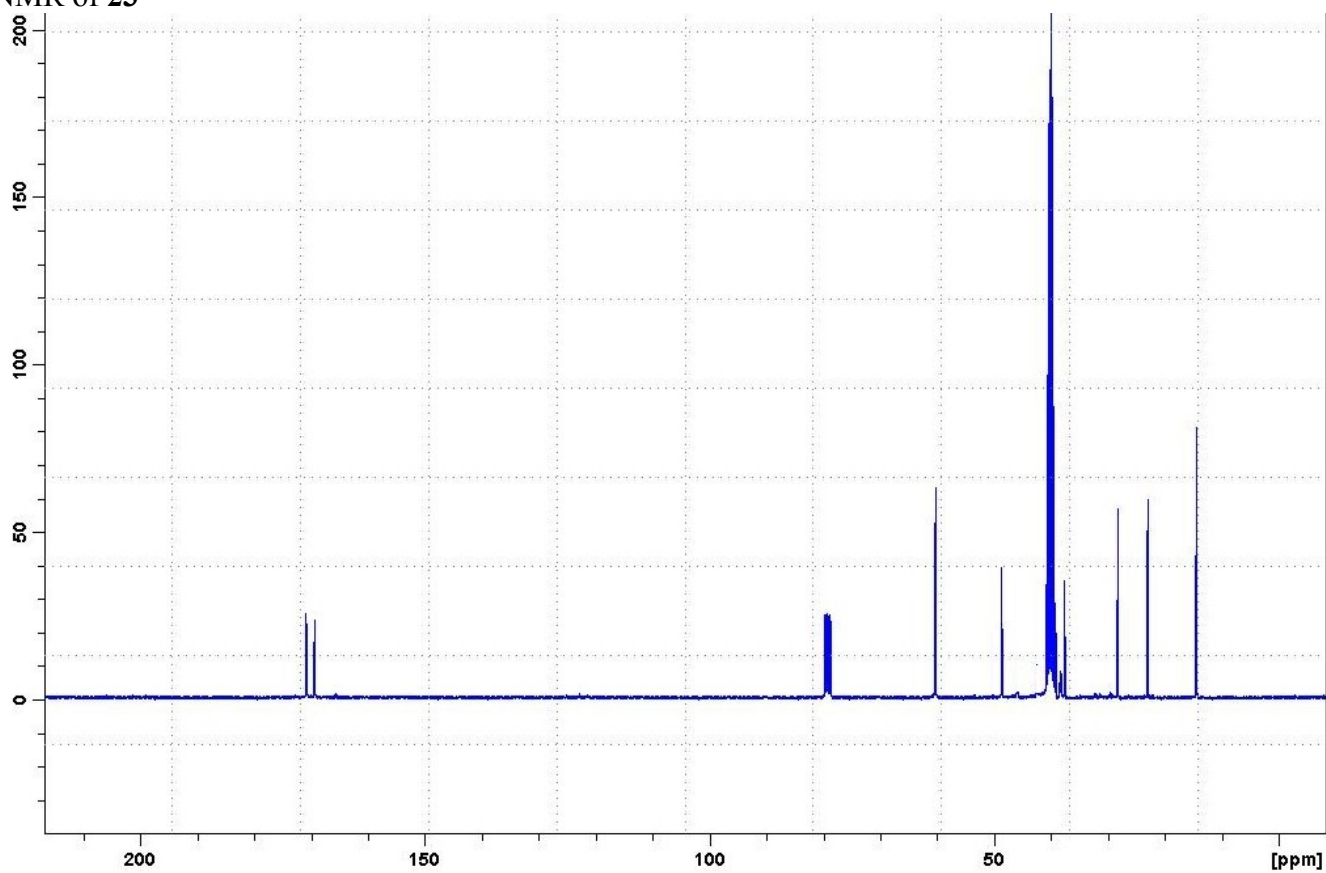

# Ethyl {2-[(*E*)-2-benzylidenehydrazinyl]-4,5-dihydro-1,3-thiazol-4-yl}acetate (**24**)

<sup>1</sup>H NMR of **24**

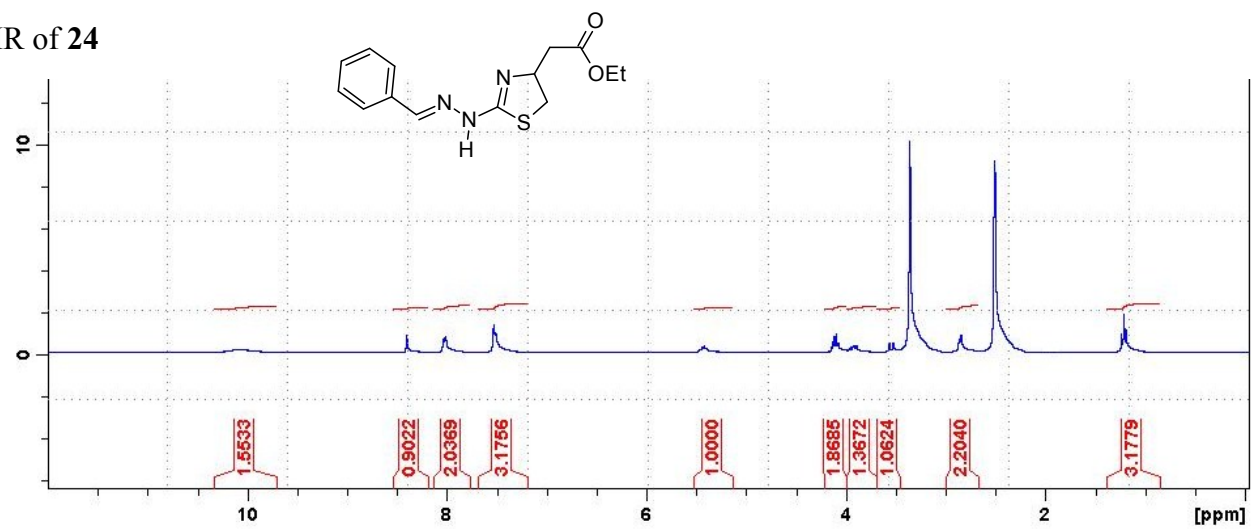

<sup>13</sup>C NMR of **24**

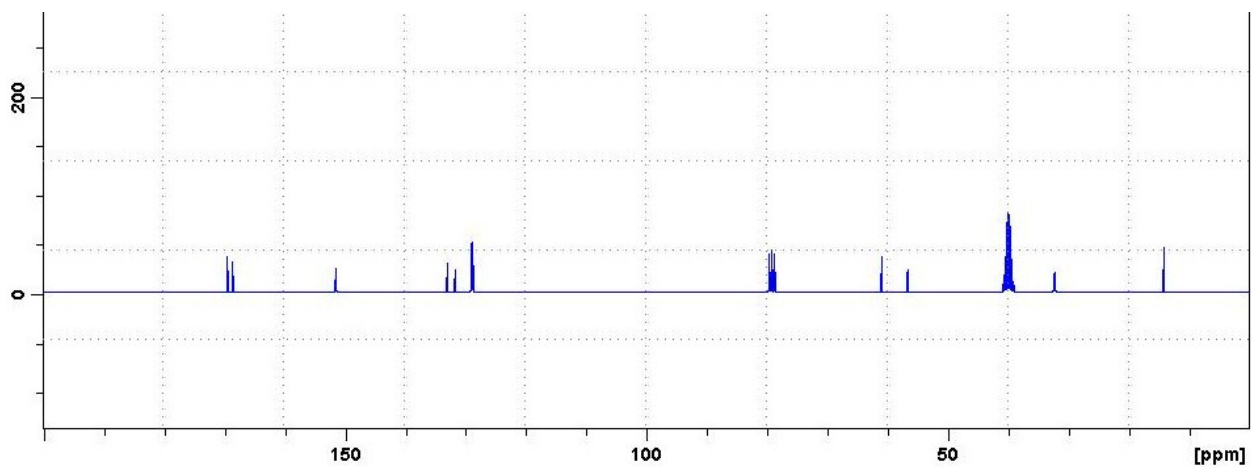

Ethyl (2-((2E)-2-[(4-hydroxyphenyl)methylidene]hydrazinyl)-4,5-dihydro-1,3-thiazol-4-yl)acetate (25)

<sup>1</sup>H NMR of 25

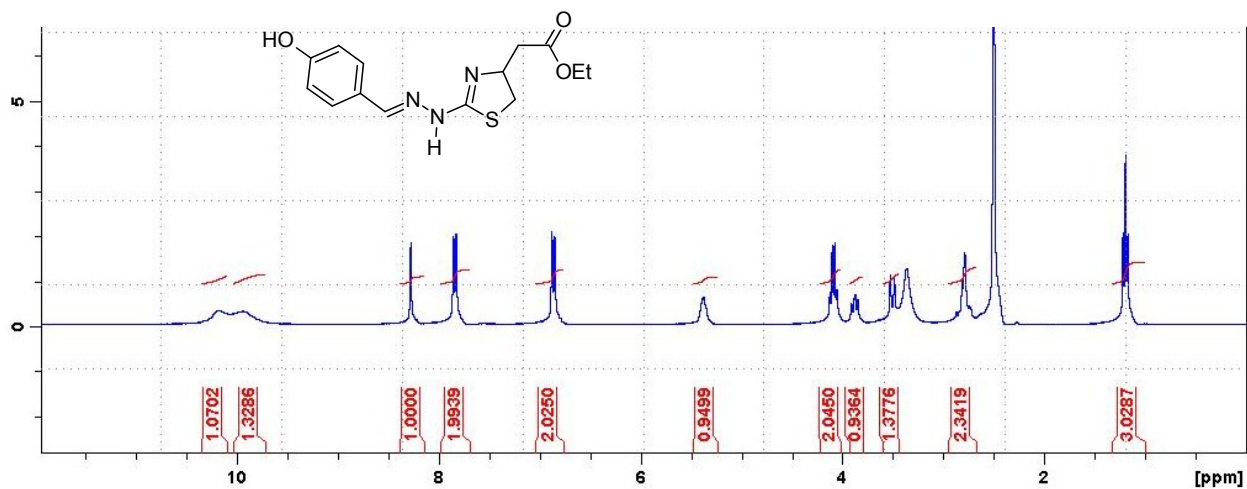

<sup>13</sup>C NMR of 25

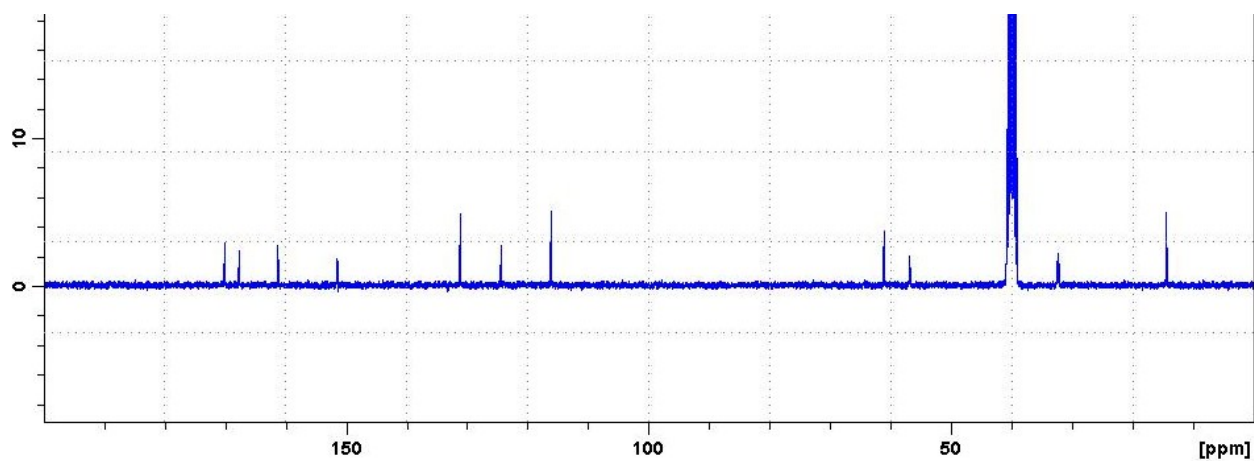



Ethyl {2-[(2E)-2-{4-(1H-pyrazol-1-yl)phenyl}methylidene}hydrazinyl]-4,5-dihydro-1,3-thiazol-4-yl}acetate (26)

<sup>1</sup>H NMR of 26

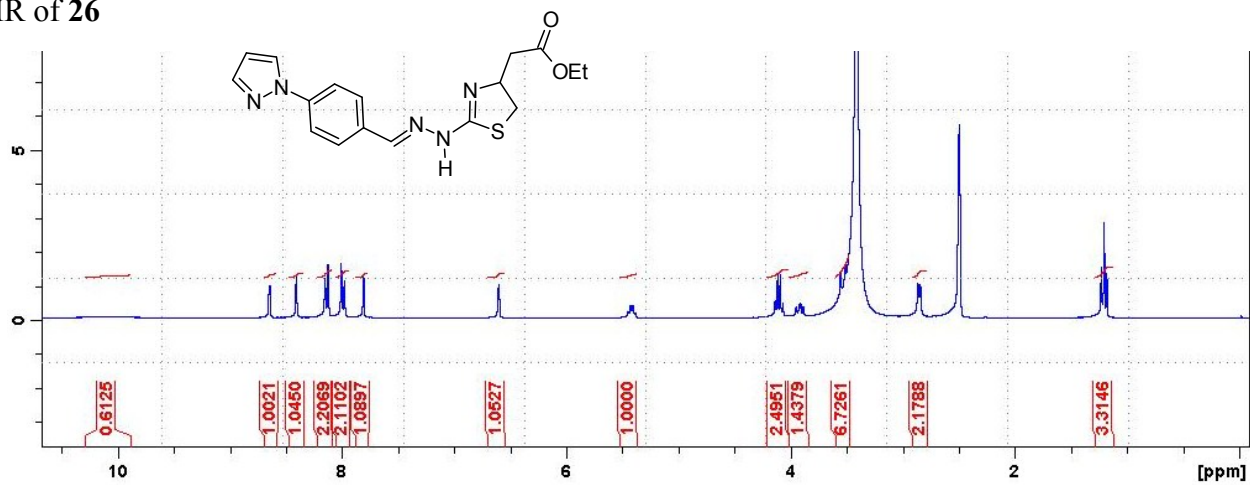

<sup>13</sup>C NMR of 26

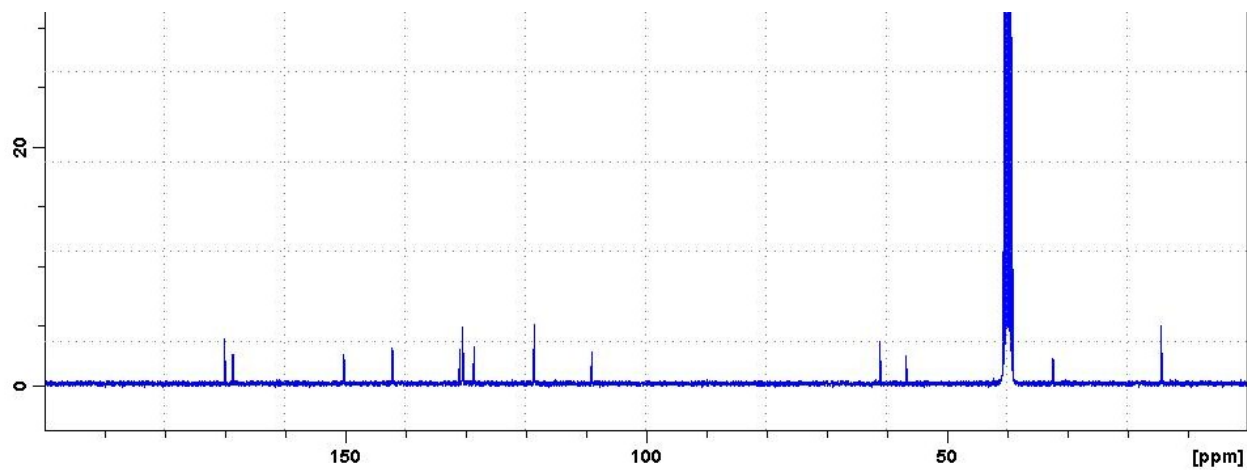

Ethyl {2-[(2E)-2-{4-(dimethylamino)phenyl}methylidene}hydrazinyl]-4,5-dihydro-1,3-thiazol-4-yl}acetate (27)

<sup>1</sup>H NMR of 27

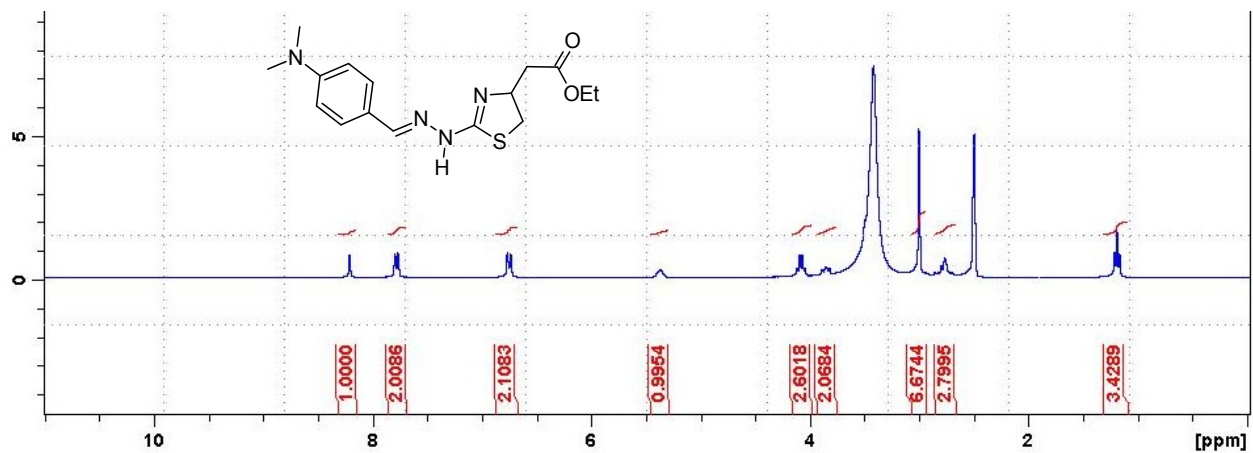

<sup>13</sup>C NMR of 27

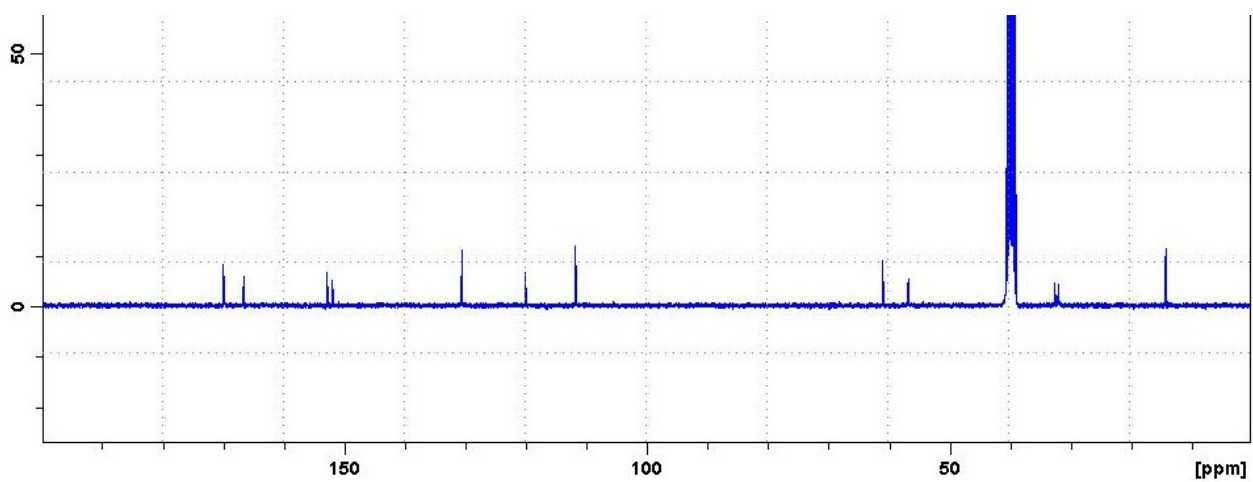



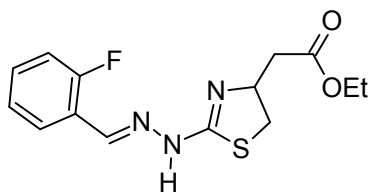

Ethyl (2-{{(2*E*)-2-[(2-fluorophenyl)methylidene]hydrazinyl}-4,5-dihydro-1,3-thiazol-4-yl)acetate (**28**)  
<sup>1</sup>H NMR of **28**

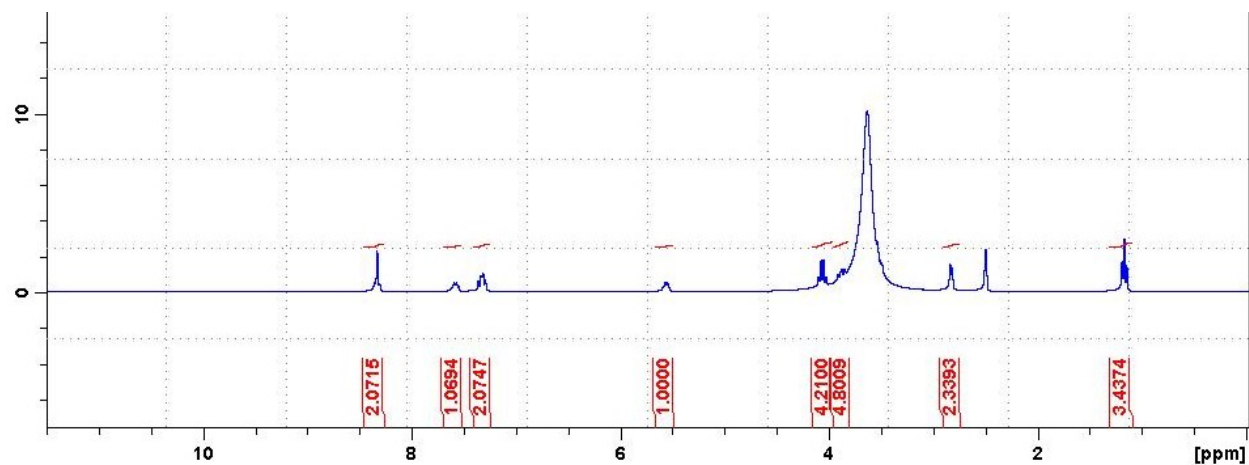

<sup>13</sup>C NMR of **28**

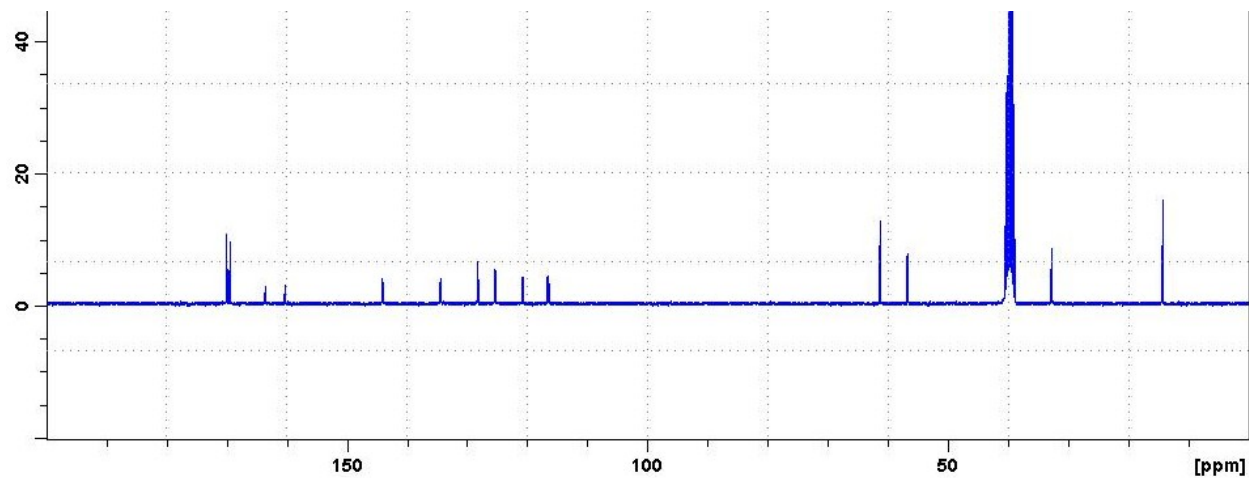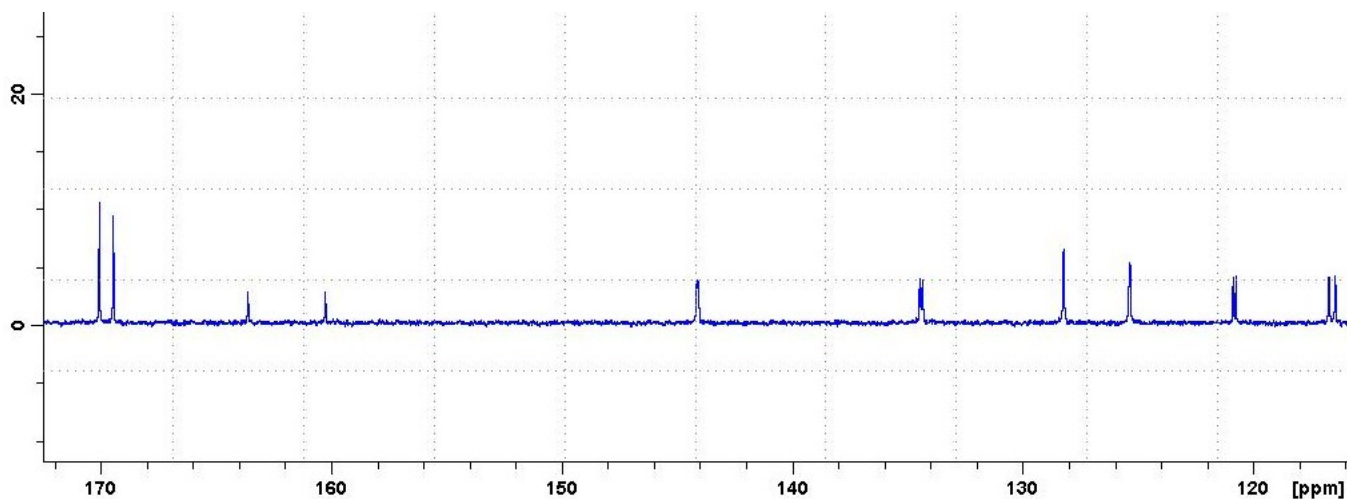

# Ethyl (2-((2E)-2-[(4-fluorophenyl)methylidene]hydrazinyl)-4,5-dihydro-1,3-thiazol-4-yl)acetate (29)

$^1\text{H}$  NMR of 29

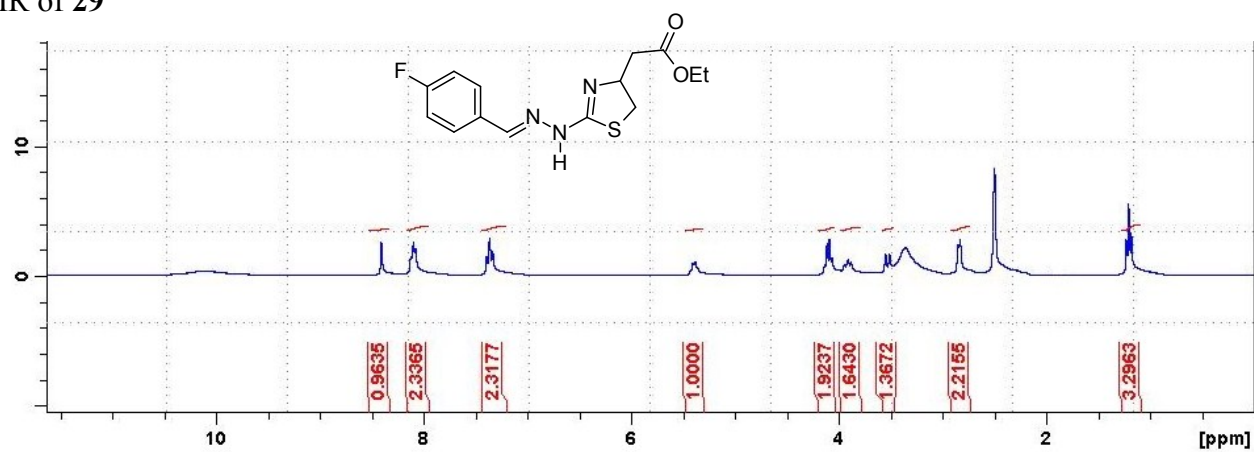

$^{13}\text{C}$  NMR of 29

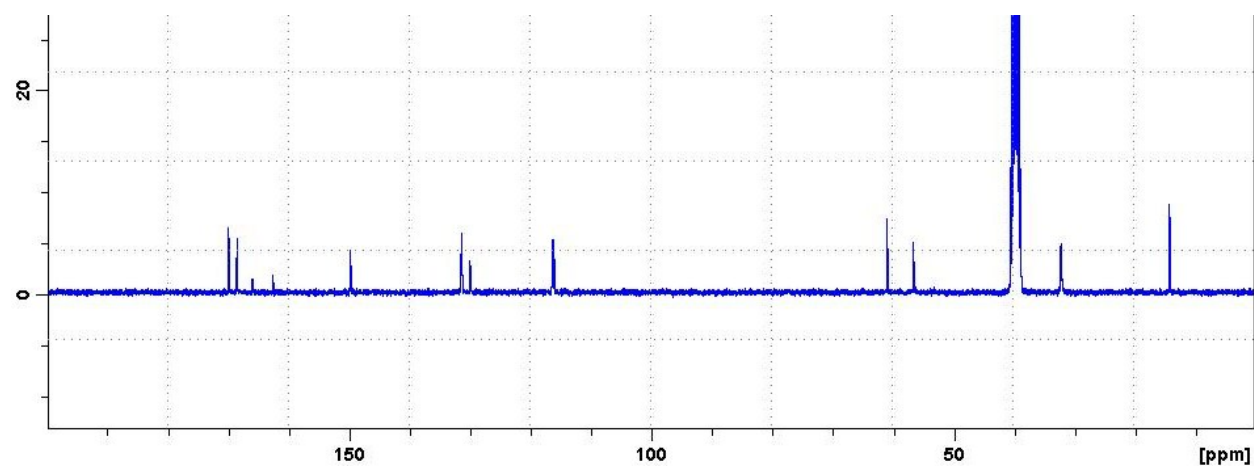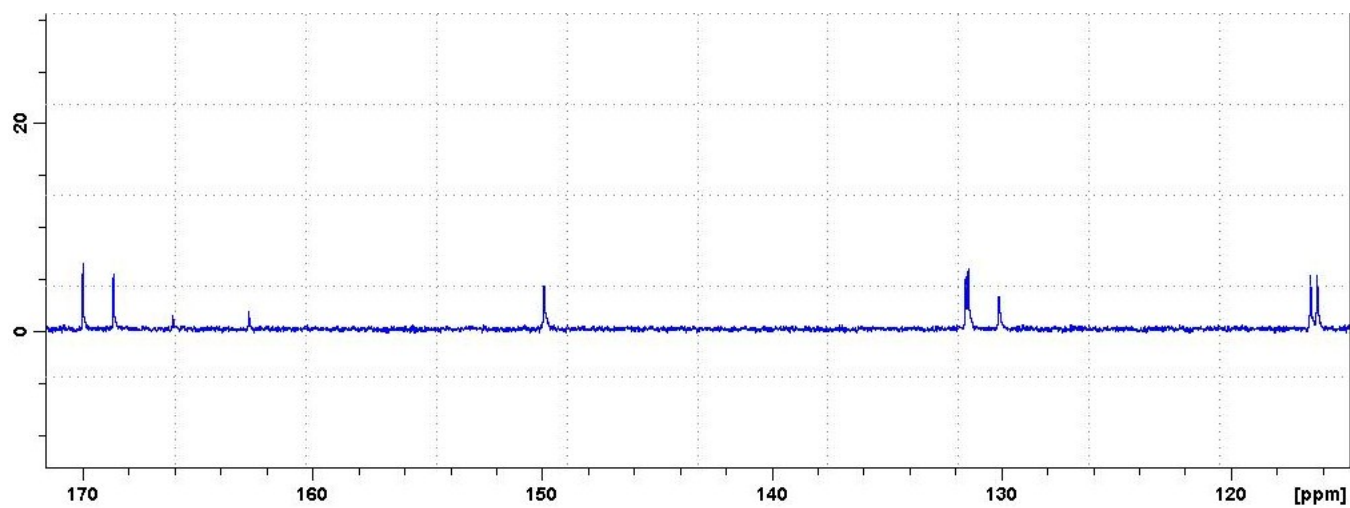

**Ethyl (2-((2E)-2-[(4-chlorophenyl)methylidene]hydrazinyl)-4,5-dihydro-1,3-thiazol-4-yl)acetate (30)**  
<sup>1</sup>H NMR of 30

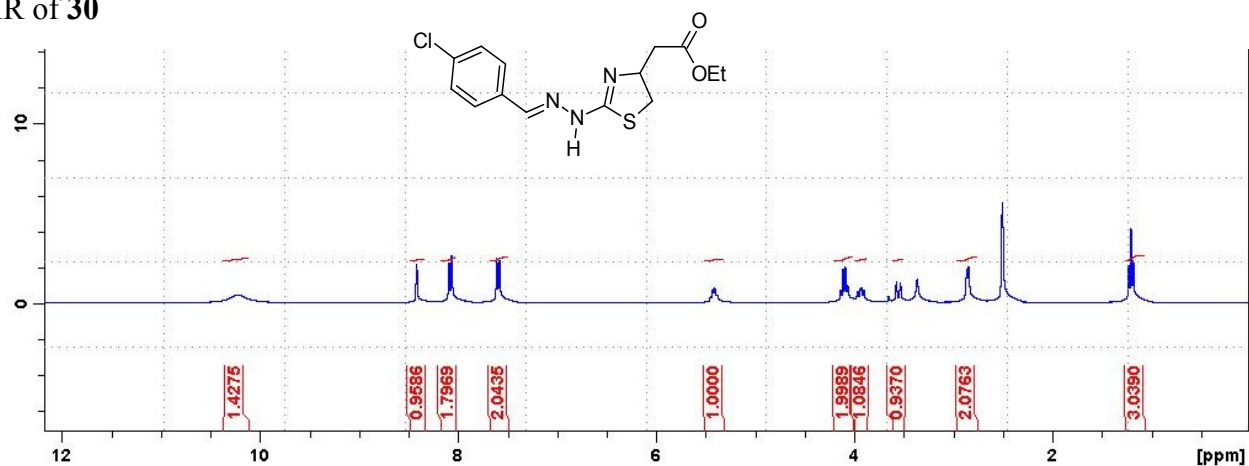

<sup>13</sup>C NMR of 30

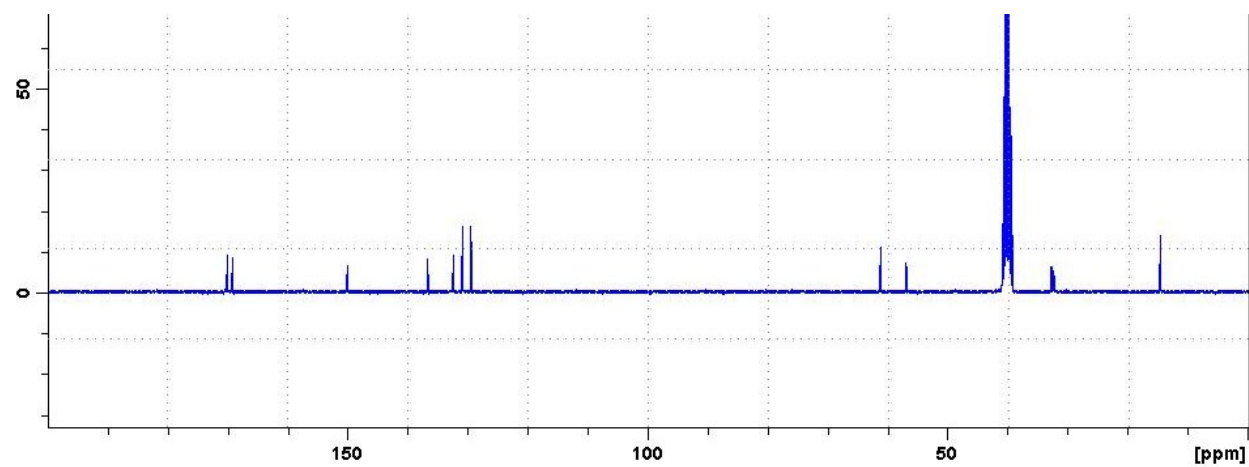

Ethyl (2-((2E)-2-[(3,4-difluorophenyl)methylidene]hydrazinyl)-4,5-dihydro-1,3-thiazol-4-yl)acetate (31)

<sup>1</sup>H NMR of 31

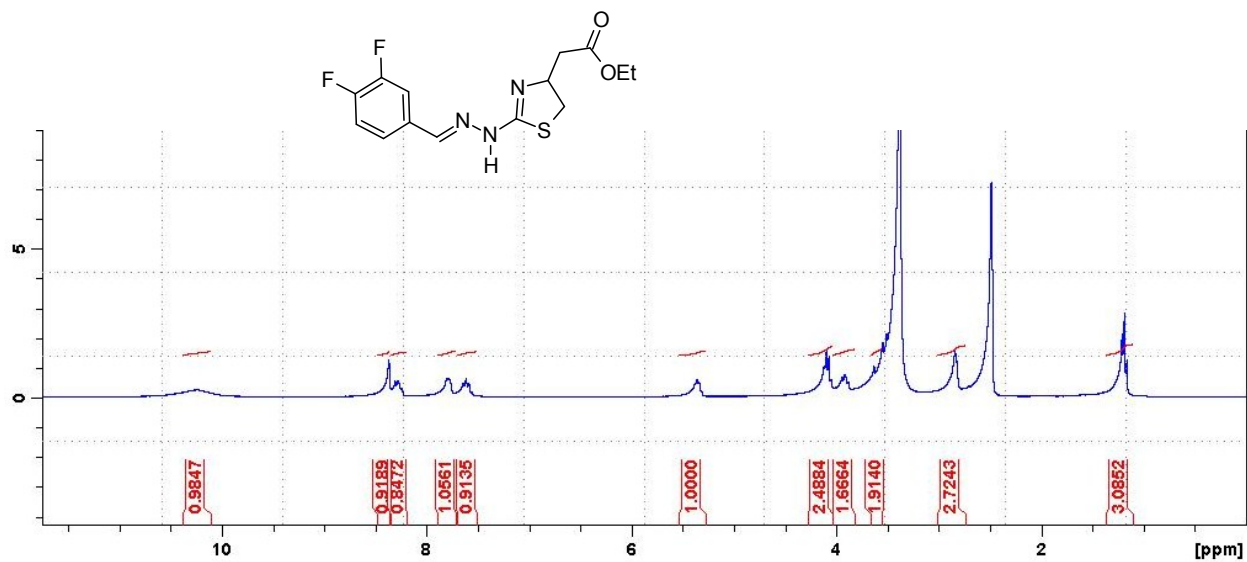

<sup>13</sup>C NMR of 31

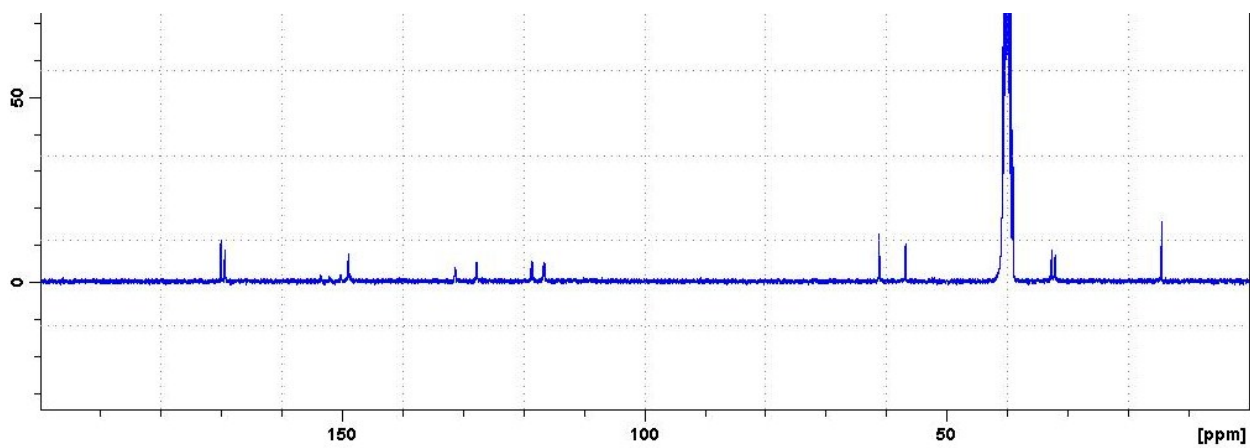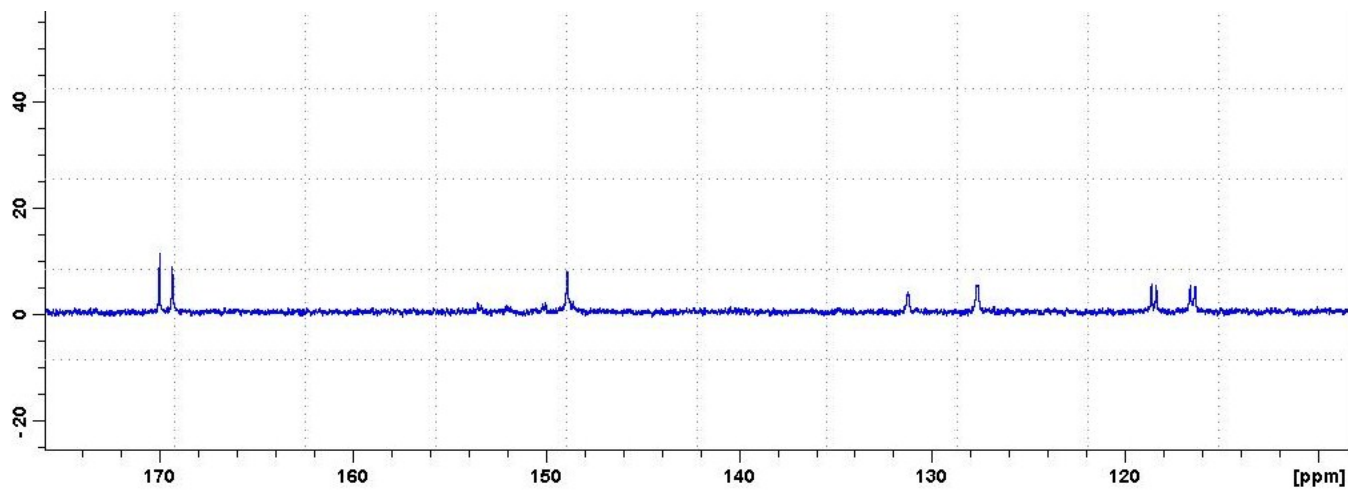

Ethyl (2-((2E)-2-[(3-bromo-4-fluorophenyl)methylidene]hydrazinyl)-4,5-dihydro-1,3-thiazol-4-yl)acetate  
(32)

<sup>1</sup>H NMR of 32

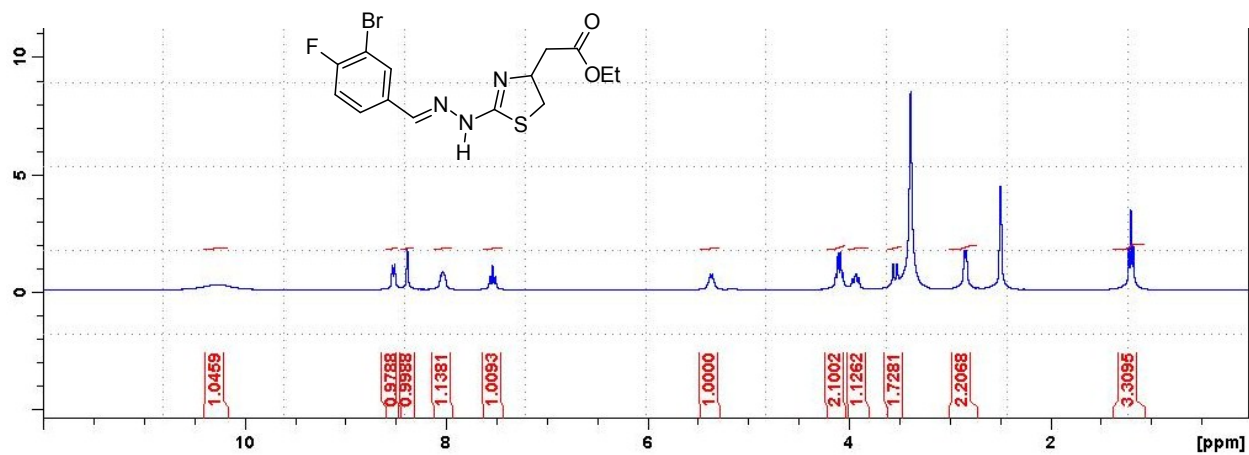

<sup>13</sup>C NMR of 32

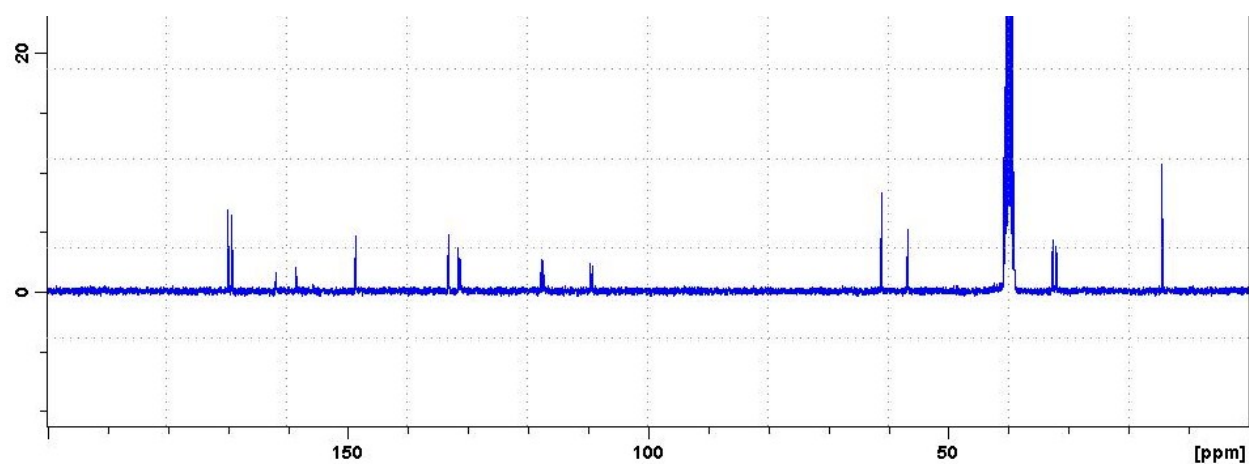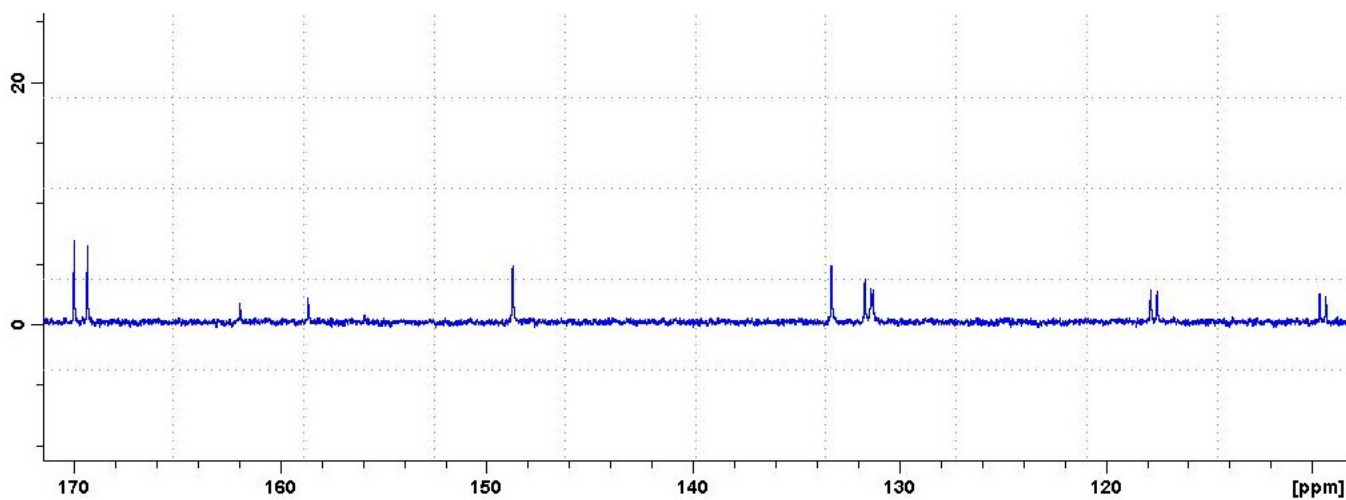

Ethyl 2-[(2E)-2-[(3-nitrophenyl)methylidene]hydrazinyl]-4,5-dihydro-1,3-thiazol-4-yl)acetate (33)  
<sup>1</sup>H NMR of 33

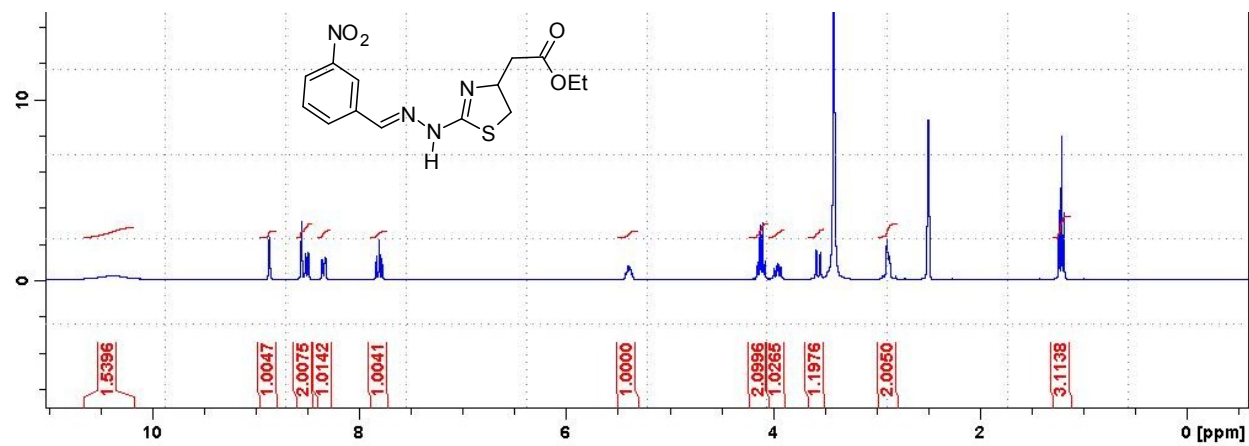

<sup>13</sup>C NMR of 33

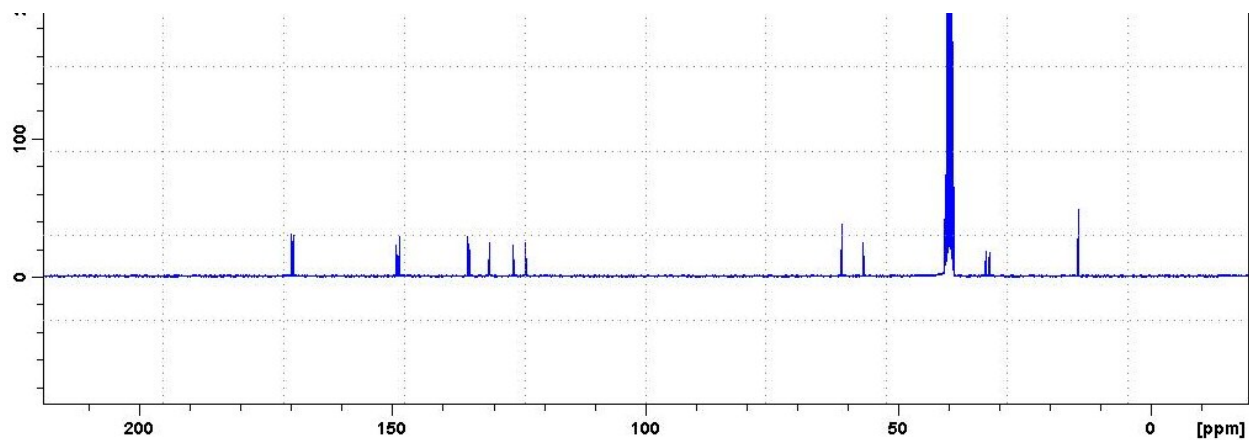



Ethyl (2-((2E)-2-[(4-nitrophenyl)methylidene]hydrazinyl)-4,5-dihydro-1,3-thiazol-4-yl)acetate (34)

<sup>1</sup>H NMR of 34

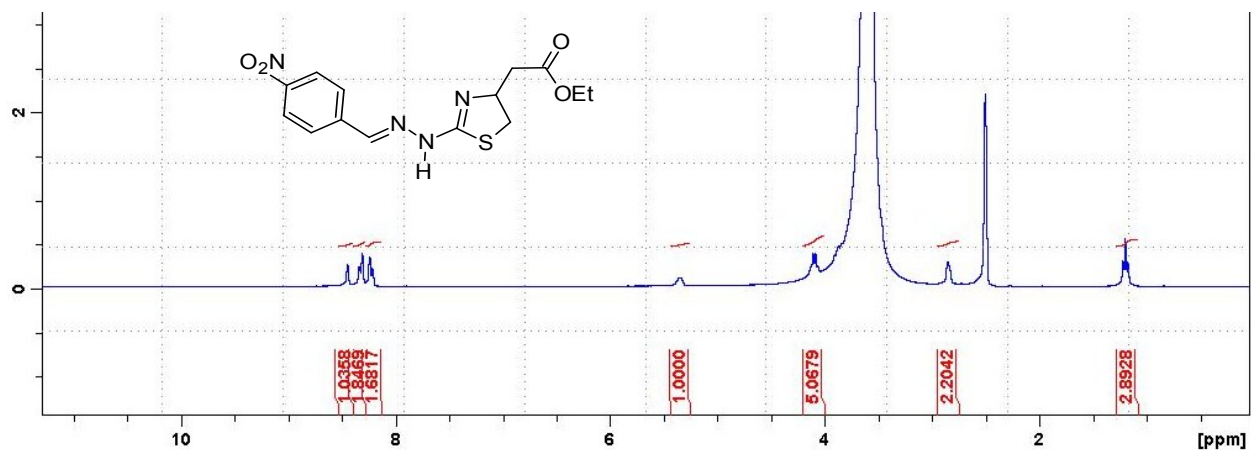

<sup>13</sup>C NMR of 34

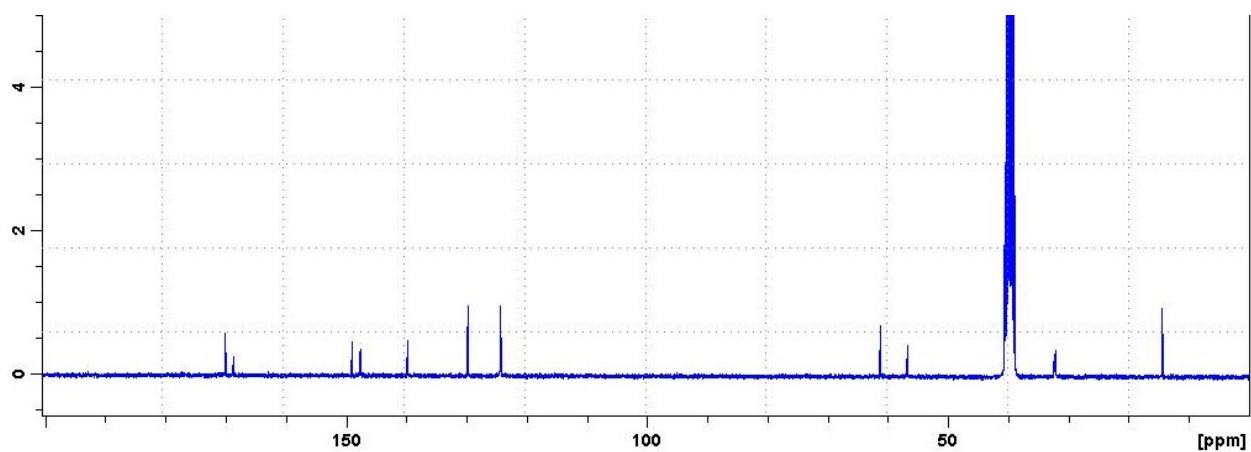

Ethyl (2-((2E)-2-[(3H-indol-3-yl)methylidene]hydrazinyl)-4,5-dihydro-1,3-thiazol-4-yl)acetate (35)

<sup>1</sup>H NMR of 35

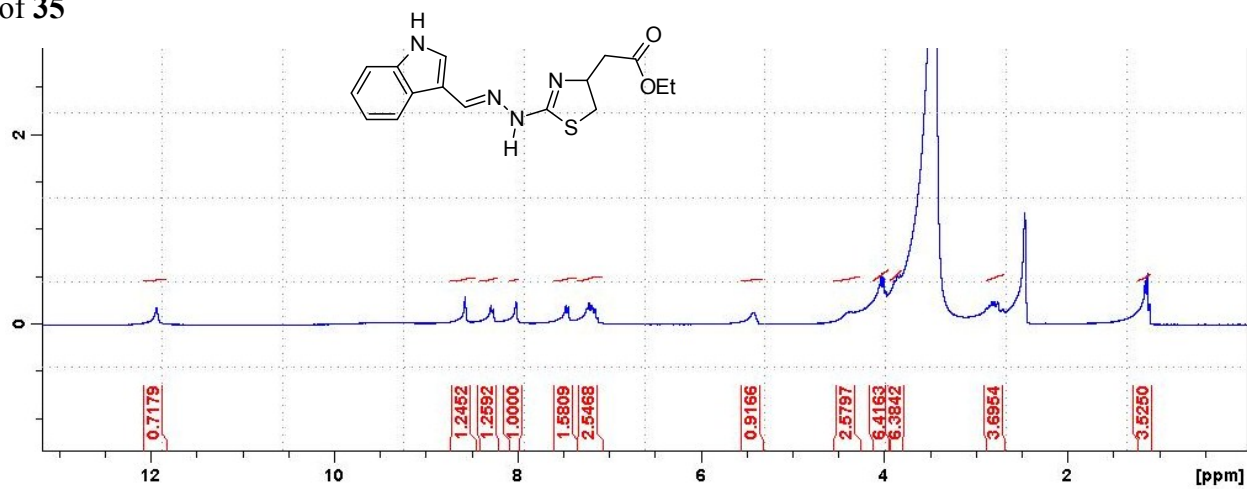

<sup>13</sup>C NMR of 35

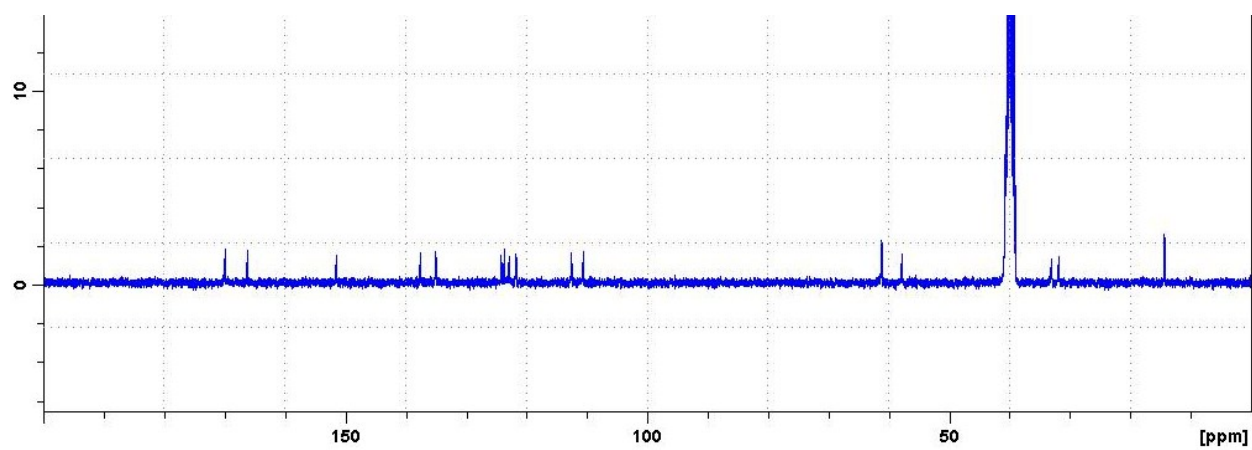



Ethyl {2-[(2Z)-2-(1-phenylethylidene)hydrazinyl]-4,5-dihydro-1,3-thiazol-4-yl}acetate (36)

<sup>1</sup>H NMR of 36

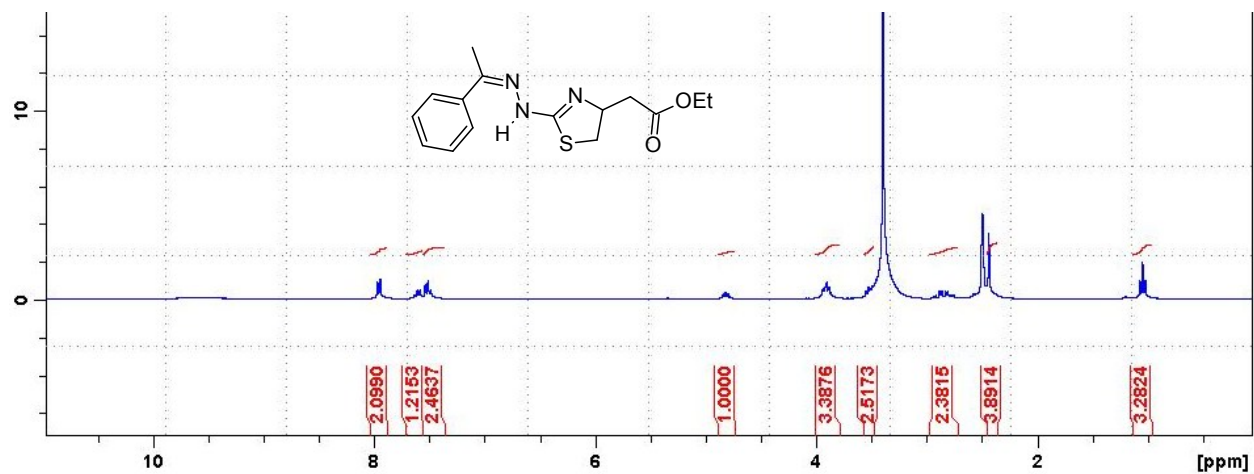

<sup>13</sup>C NMR of 36

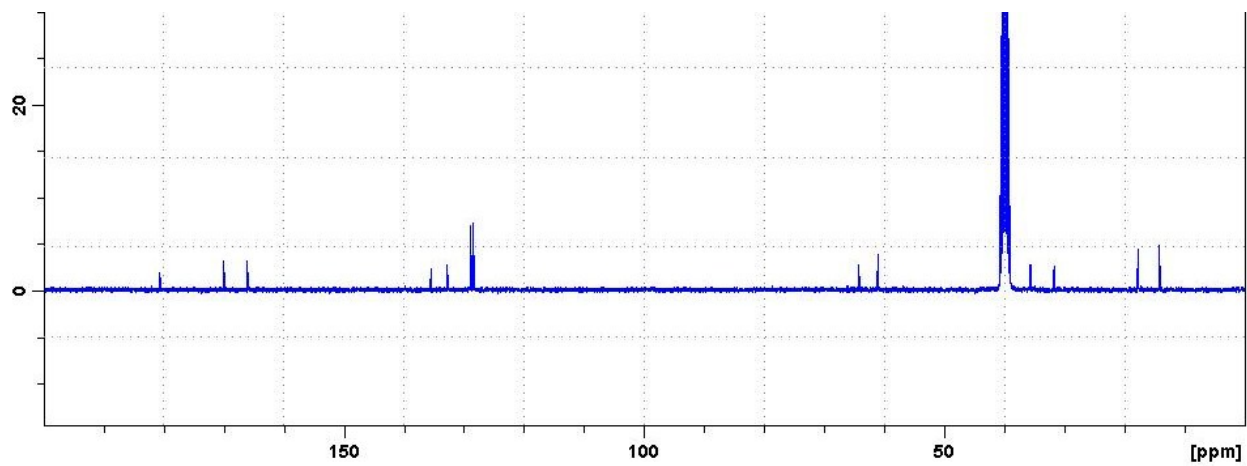

Ethyl {2-[(2E)-2-{2-[3-(trifluoromethyl)phenyl]propylidene}hydrazinyl]-4,5-dihydro-1,3-thiazol-4-yl}acetate (37)

<sup>1</sup>H NMR of 37

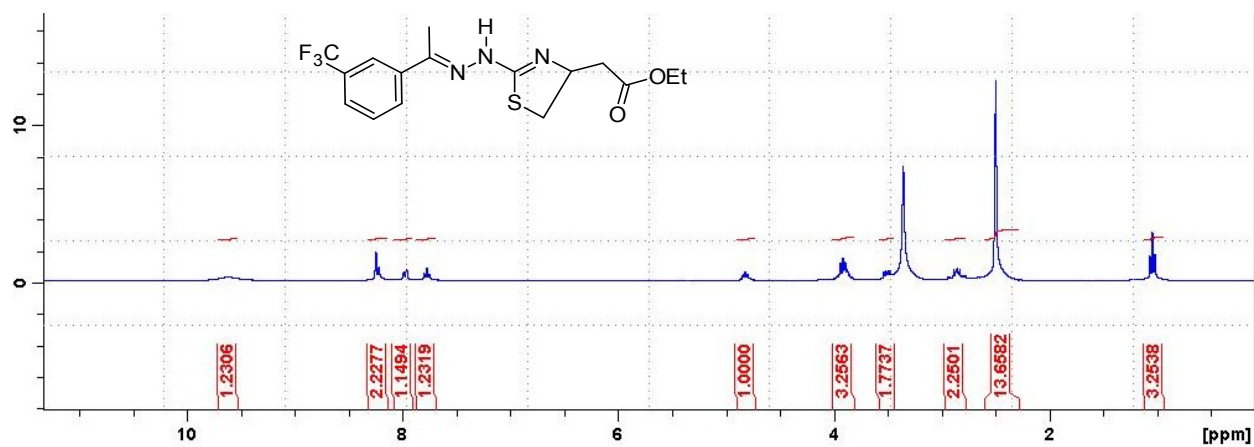

<sup>13</sup>C NMR of 37

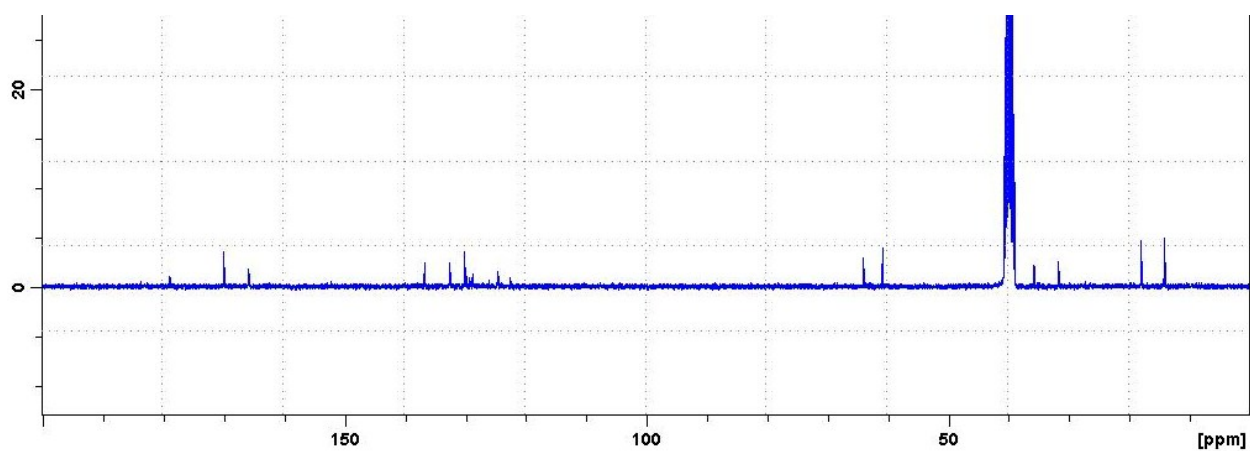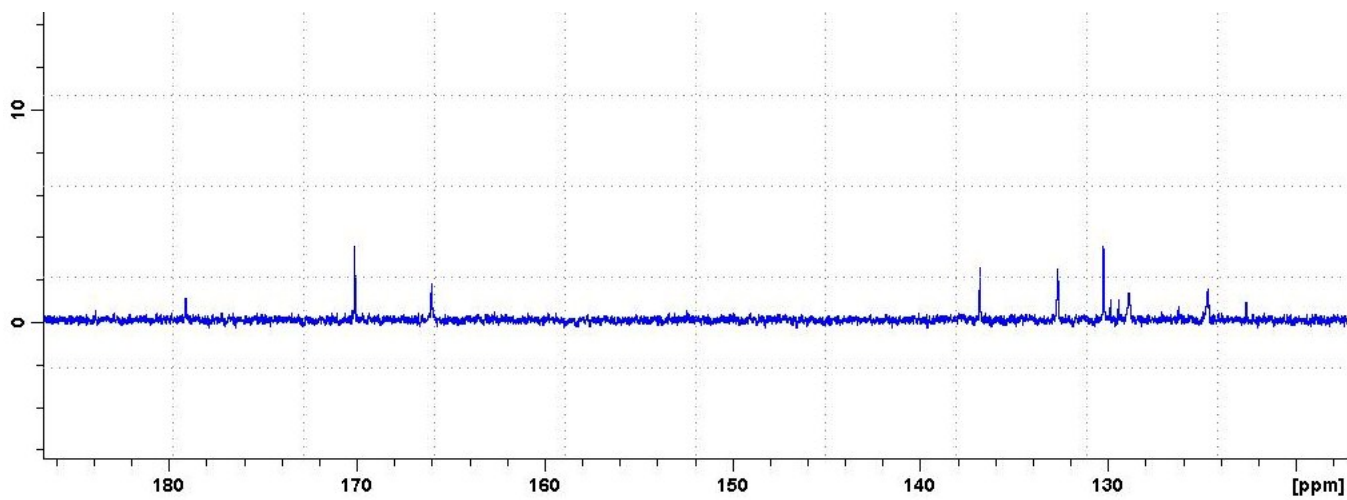

# Ethyl (2-((2E)-2-[2-(naphthalen-2-yl)propylidene]hydrazinyl)-4,5-dihydro-1,3-thiazol-4-yl)acetate (38)

<sup>1</sup>H NMR of 38

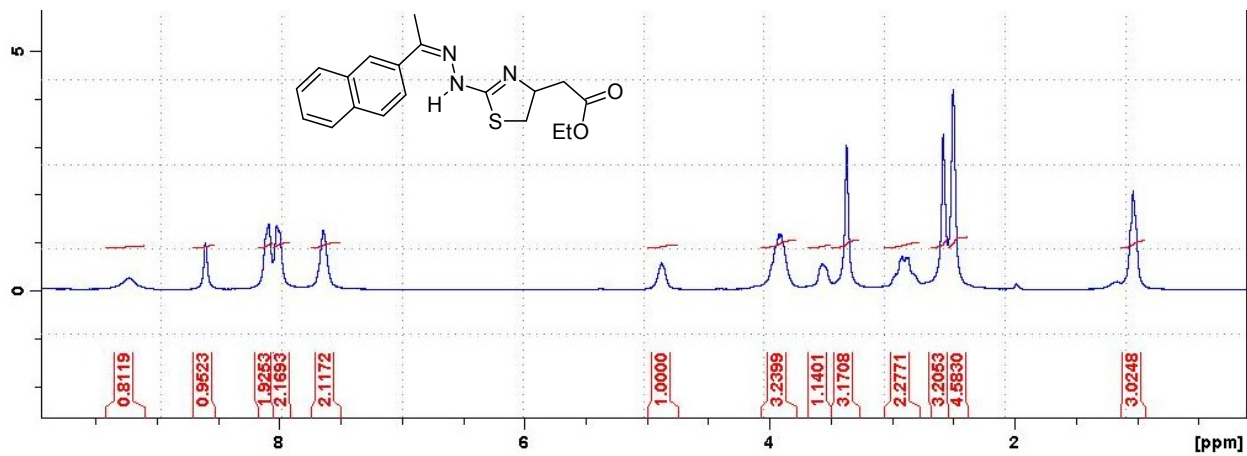

<sup>13</sup>C NMR of 38

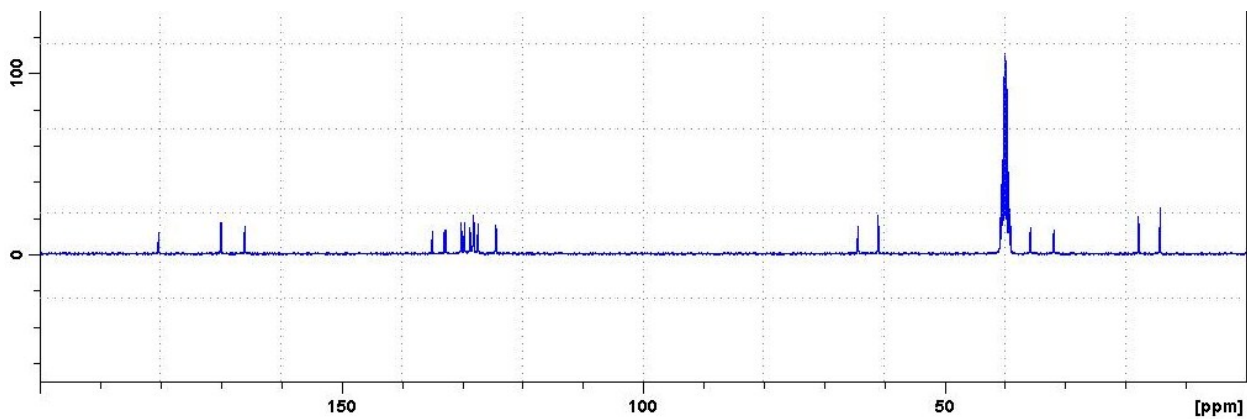

Ethyl (2-((2Z)-2-[1-(6-methoxynaphthalen-2-yl)ethylidene]hydrazinyl)-4,5-dihydro-1,3-thiazol-4-yl)acetate (39)

<sup>1</sup>H NMR of 39

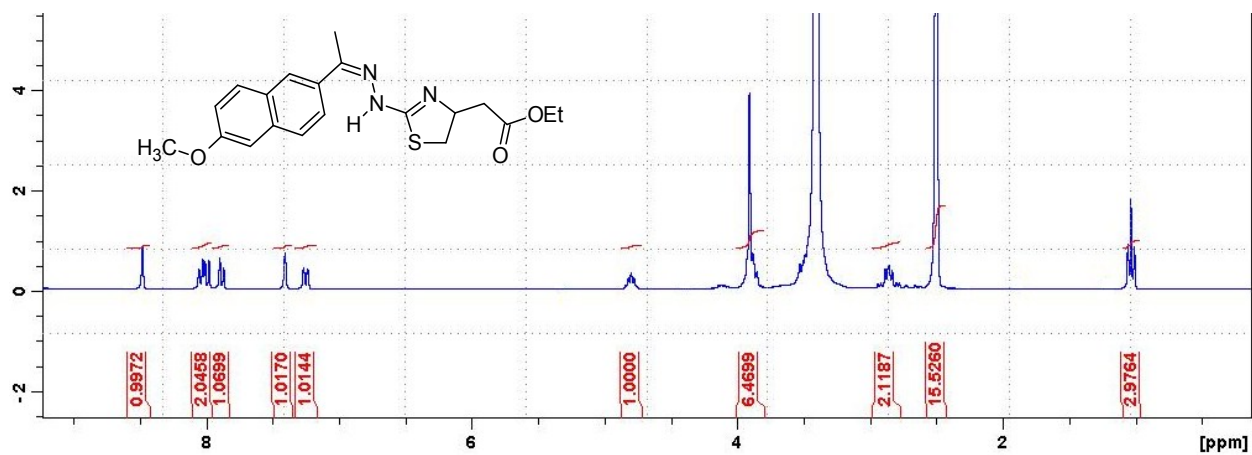

<sup>13</sup>C NMR of 39

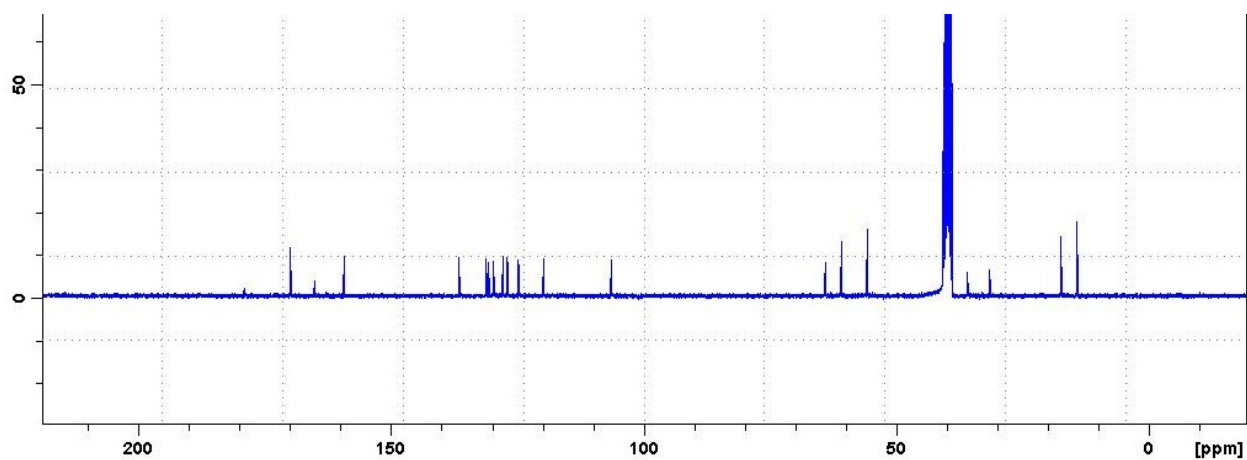

# 4-{{4-(2-Ethoxy-2-oxoethyl)-1,3-thiazol-2-yl}amino}benzoic acid (40)

<sup>1</sup>H NMR of 40

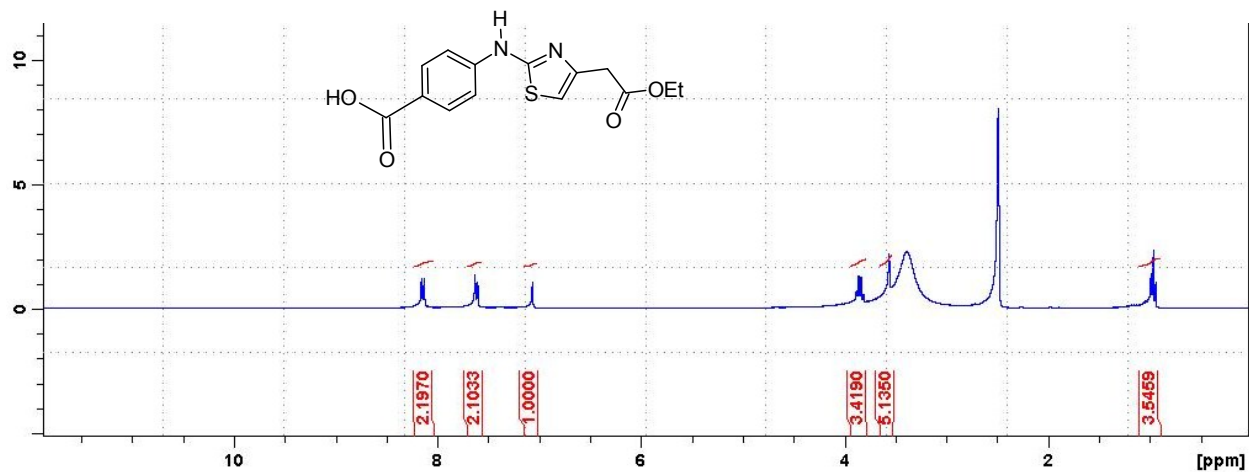

<sup>13</sup>C NMR of 40

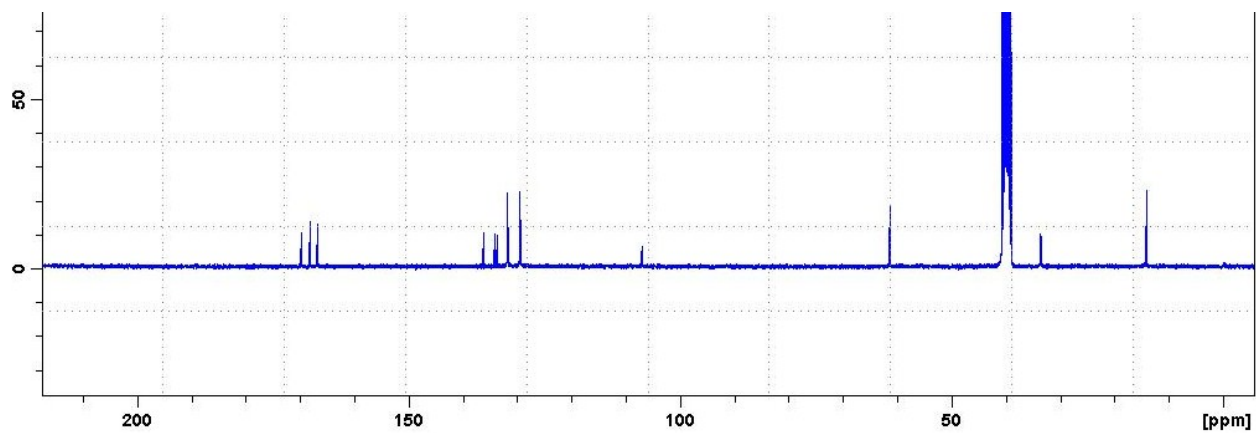

# Ethyl [2-(benzylamino)-1,3-thiazol-4-yl]acetate (41)

<sup>1</sup>H NMR of 41

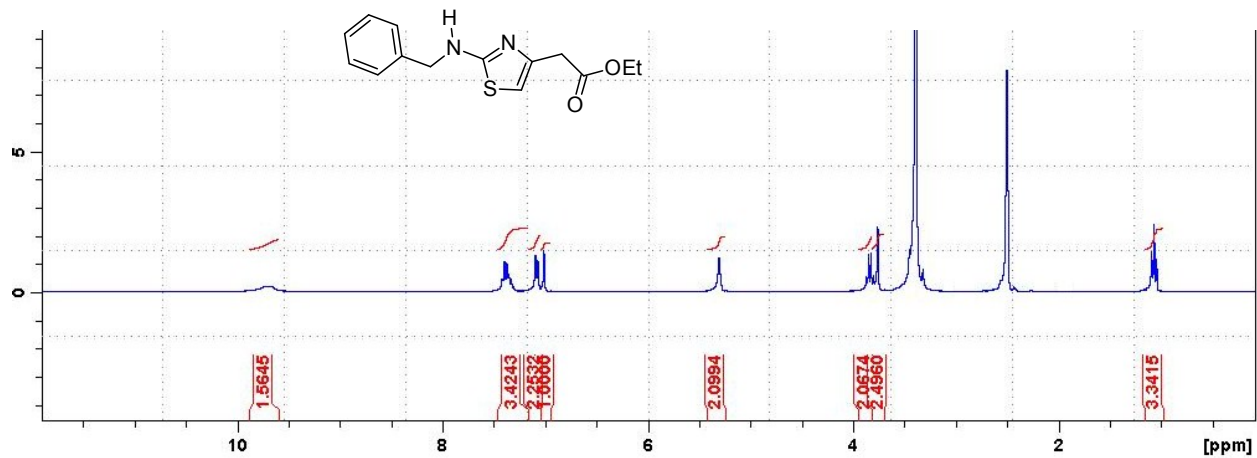

<sup>13</sup>C NMR of 41

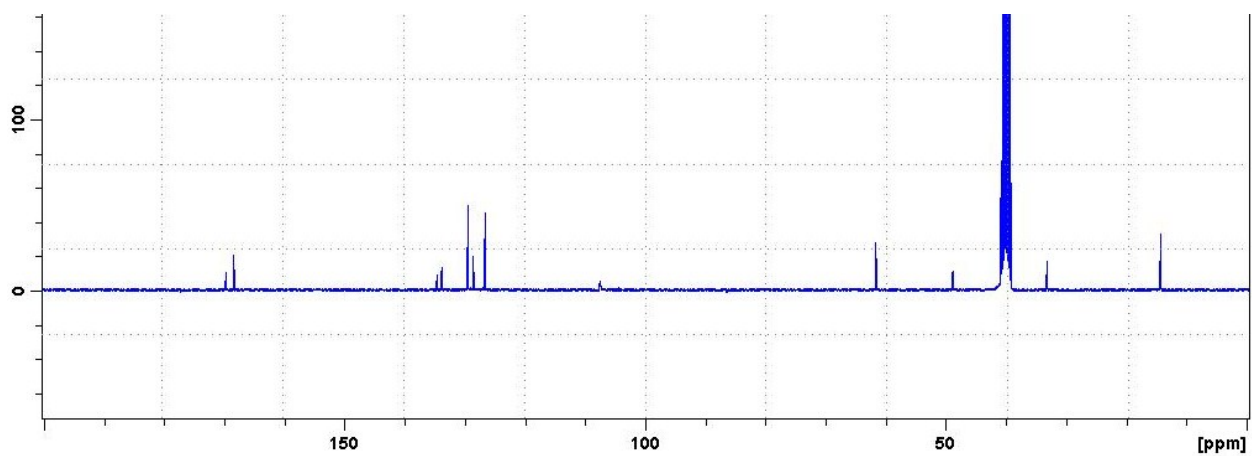



Ethyl {2-[(4-chlorophenyl)amino]-1,3-thiazol-4-yl}acetate (42)

<sup>1</sup>H NMR of 42

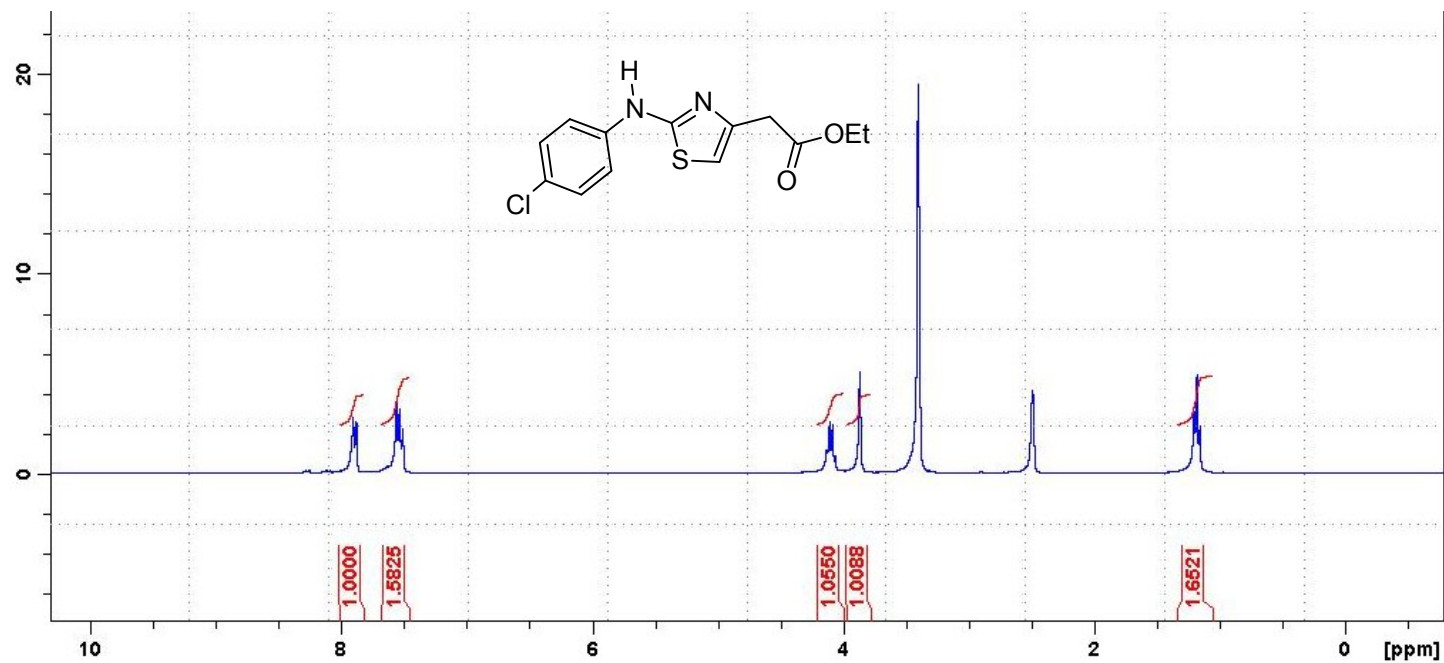

<sup>13</sup>C NMR of 42

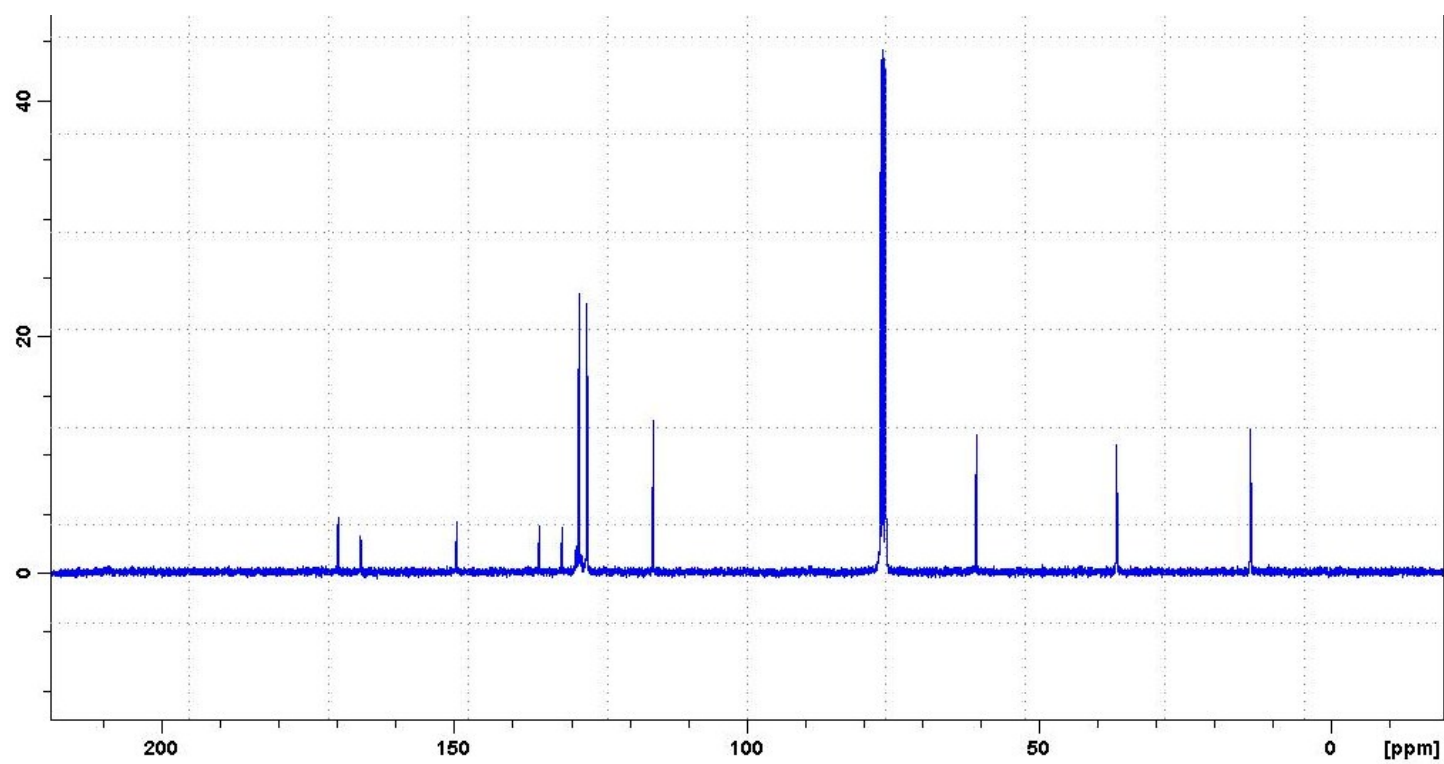

Ethyl (2-{{4-(trifluoromethyl)phenyl}amino}-1,3-thiazol-4-yl)acetate (43)

<sup>1</sup>H NMR of 43

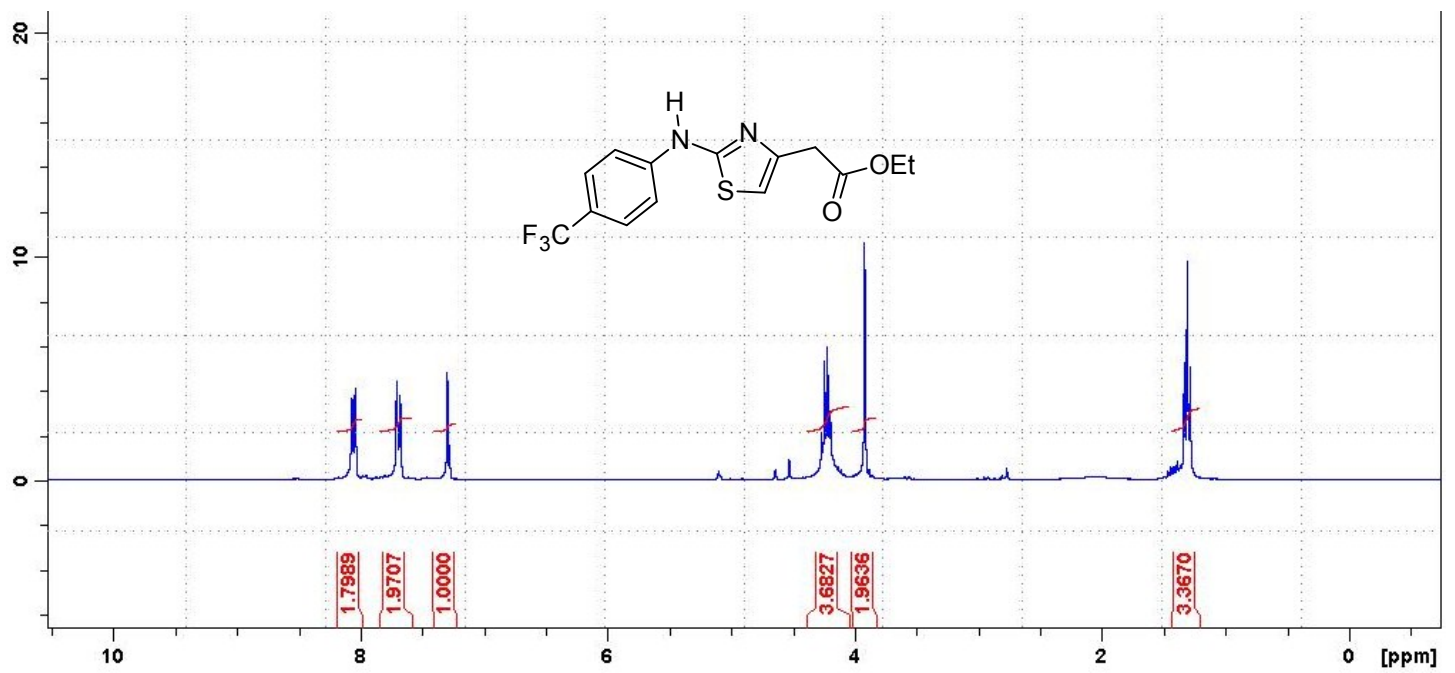

<sup>13</sup>C NMR of 43

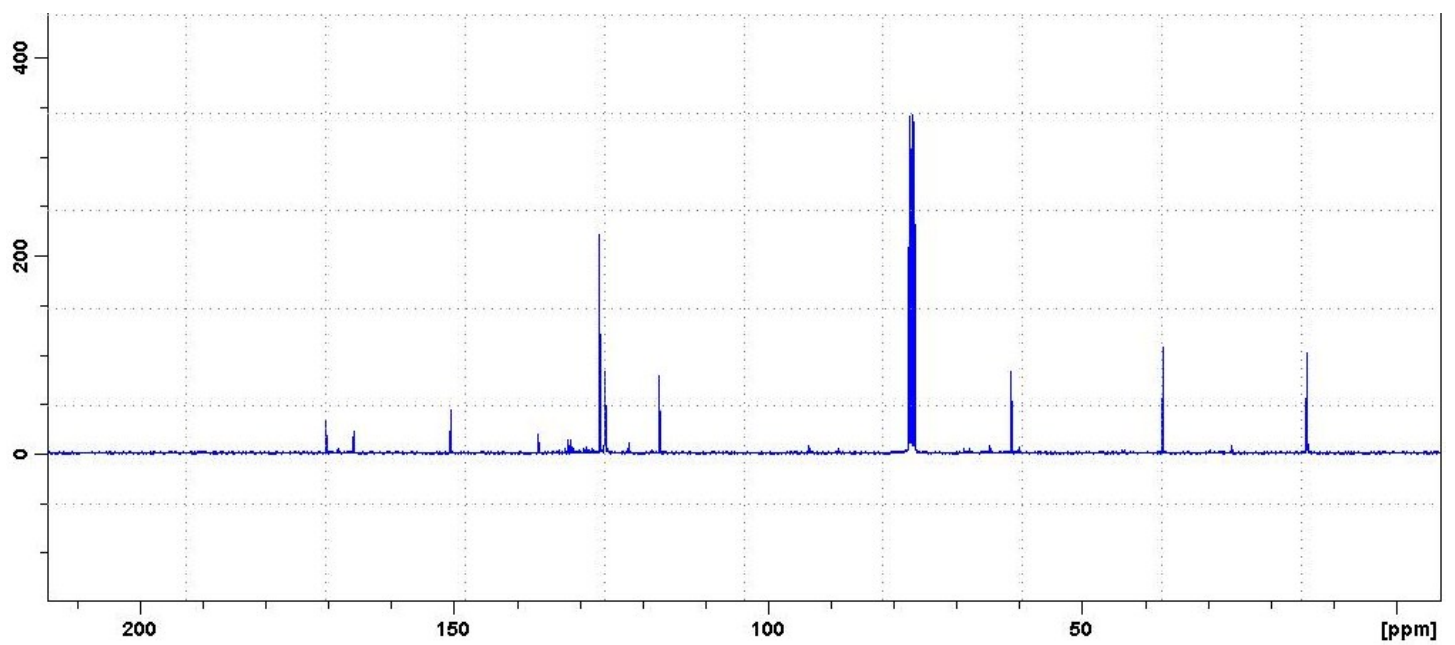

Supplement: RA-007-C7RA05993K-s001.pdf [file RA-007-C7RA05993K-s001.pdf]
